# Supplementary material for: Phosphine-catalyzed [3 + 2] and [4 + 2] annulation reactions of ynones with barbiturate-derived alkenes
Source: Royal Society of Chemistry journal article supplement (doi:10.1039/c7ob01034f), 2017-01-01
Supplement: c7ob01034f1.pdf [file c7ob01034f1.pdf]

## Electronic Supplementary Information

# Phosphine-Catalyzed [3+2] and [4+2] Annulation Reactions of Ynones with Barbiturate-derived Alkenes

Xing Gao, Zhen Li, Wenjun Yang, Yang Liu, Wufeng Chen, Cheng Zhang, Lufei Zheng,\* and

Hongchao Guo\*

### Contents

|                                                                |         |
|----------------------------------------------------------------|---------|
| <sup>1</sup> H and <sup>13</sup> C NMR Spectra of All Products | S2–S36  |
| Chiral HPLC analysis of chiral catalyst entry                  | S37     |
| X-Ray Crystallographic Data                                    | S38–S73 |

# <sup>1</sup>H and <sup>13</sup>C NMR Spectra of All Products

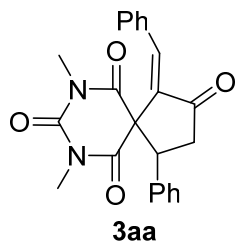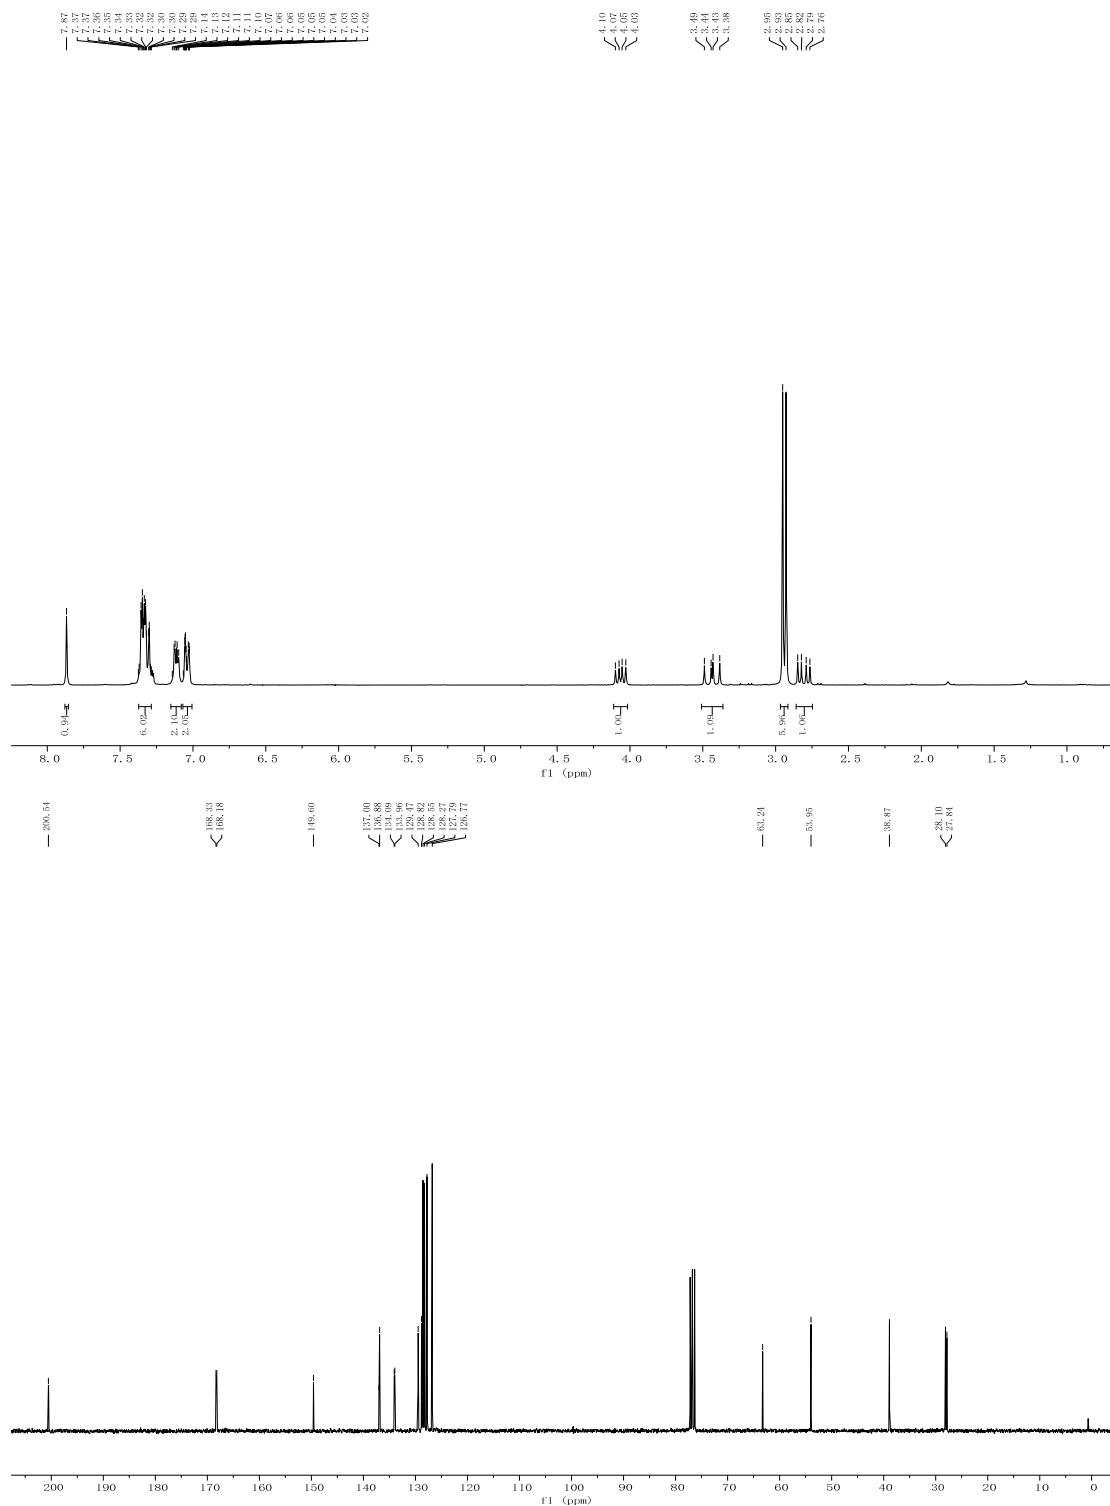

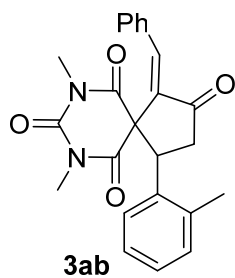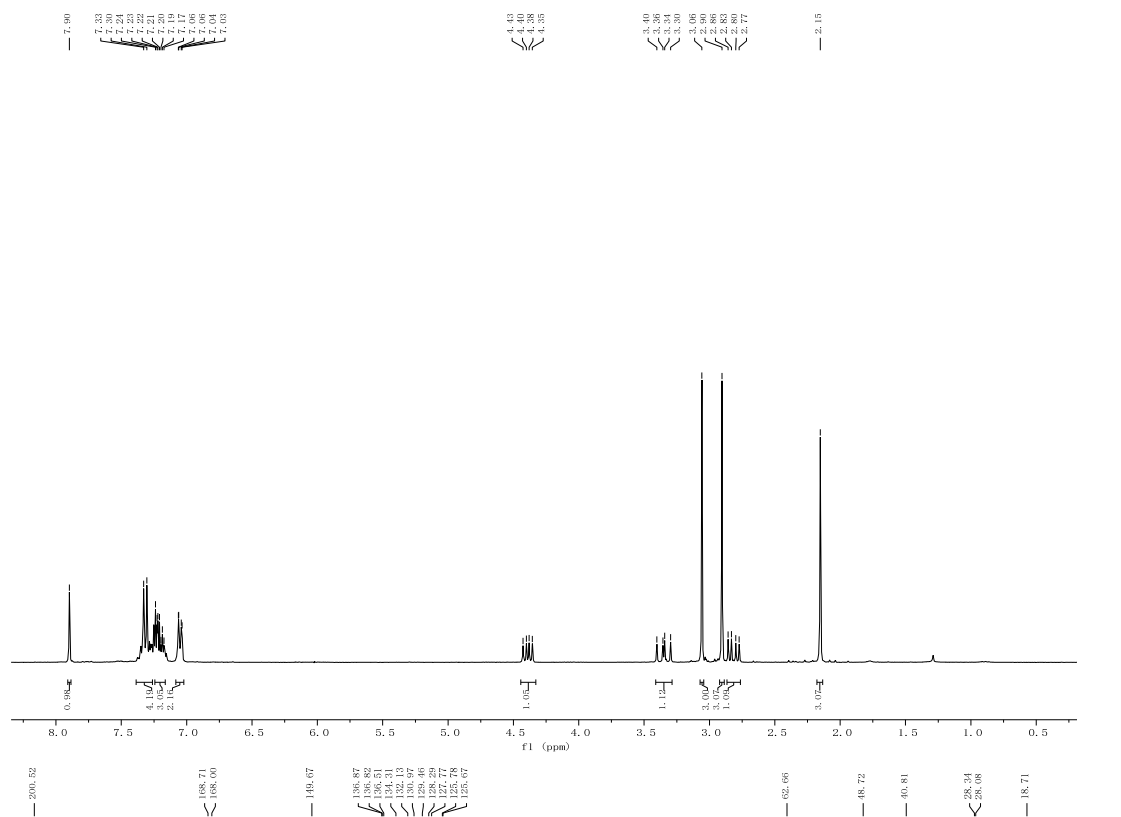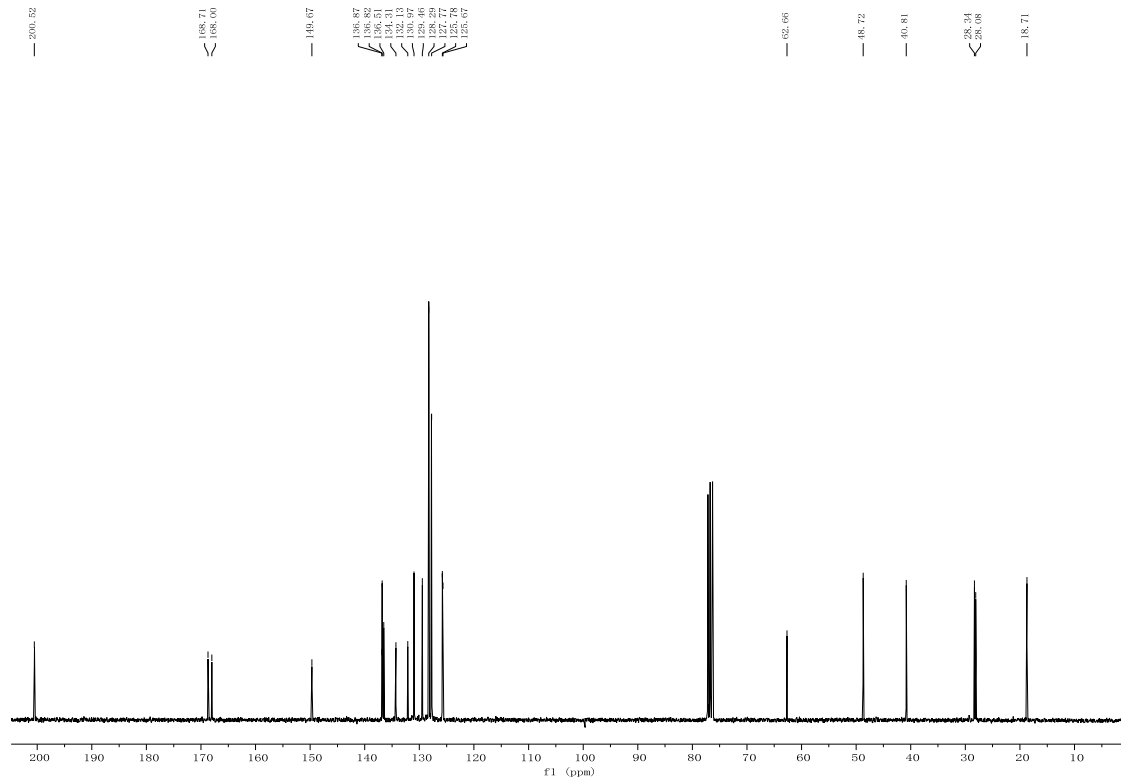

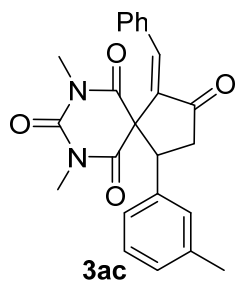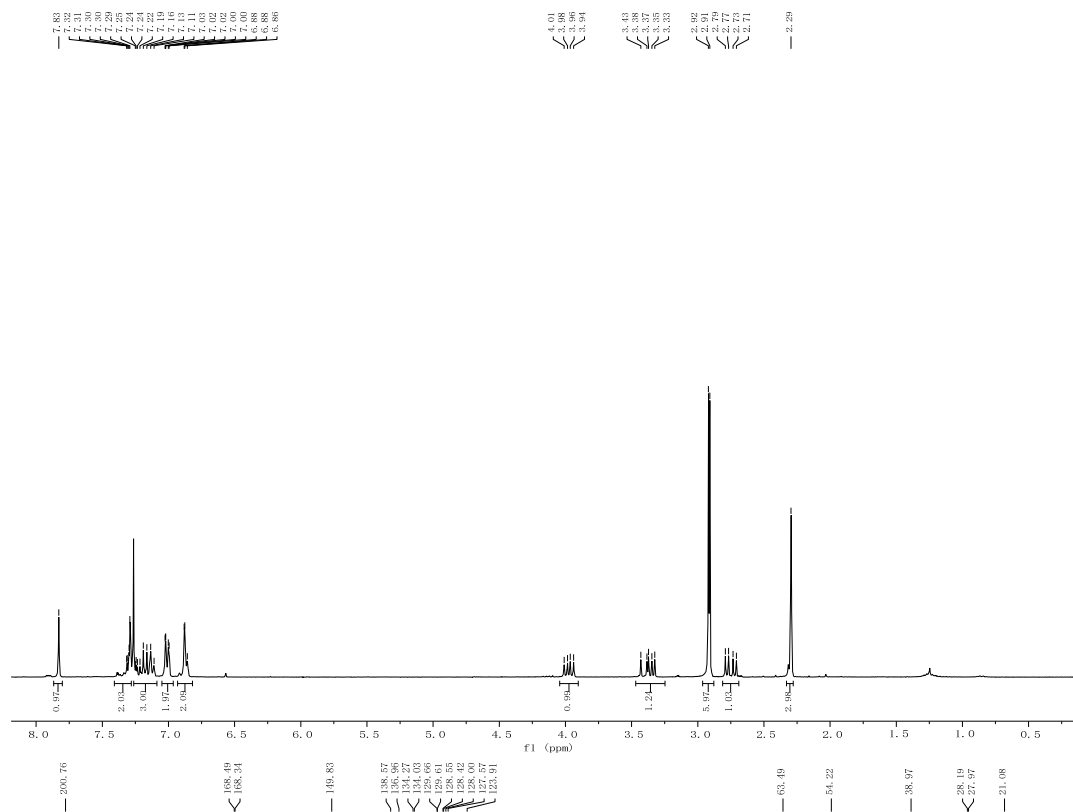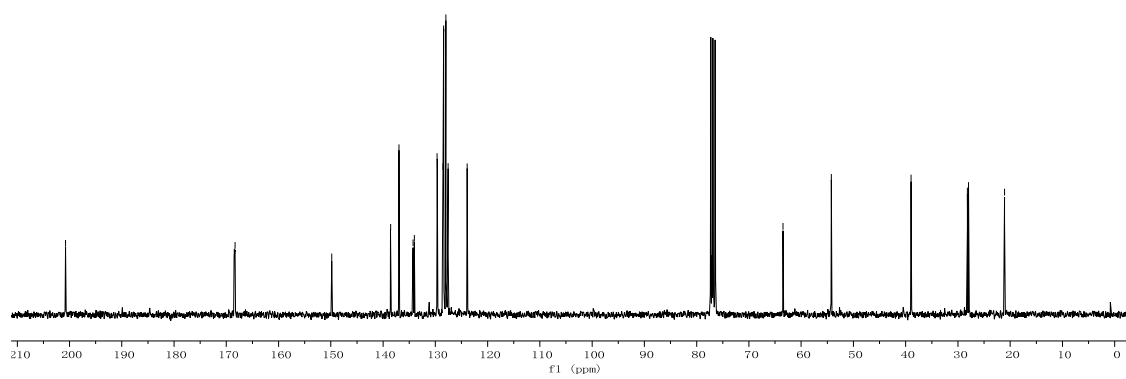

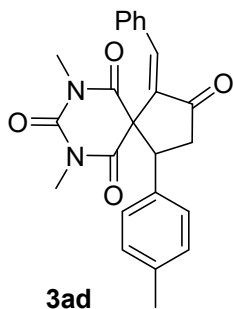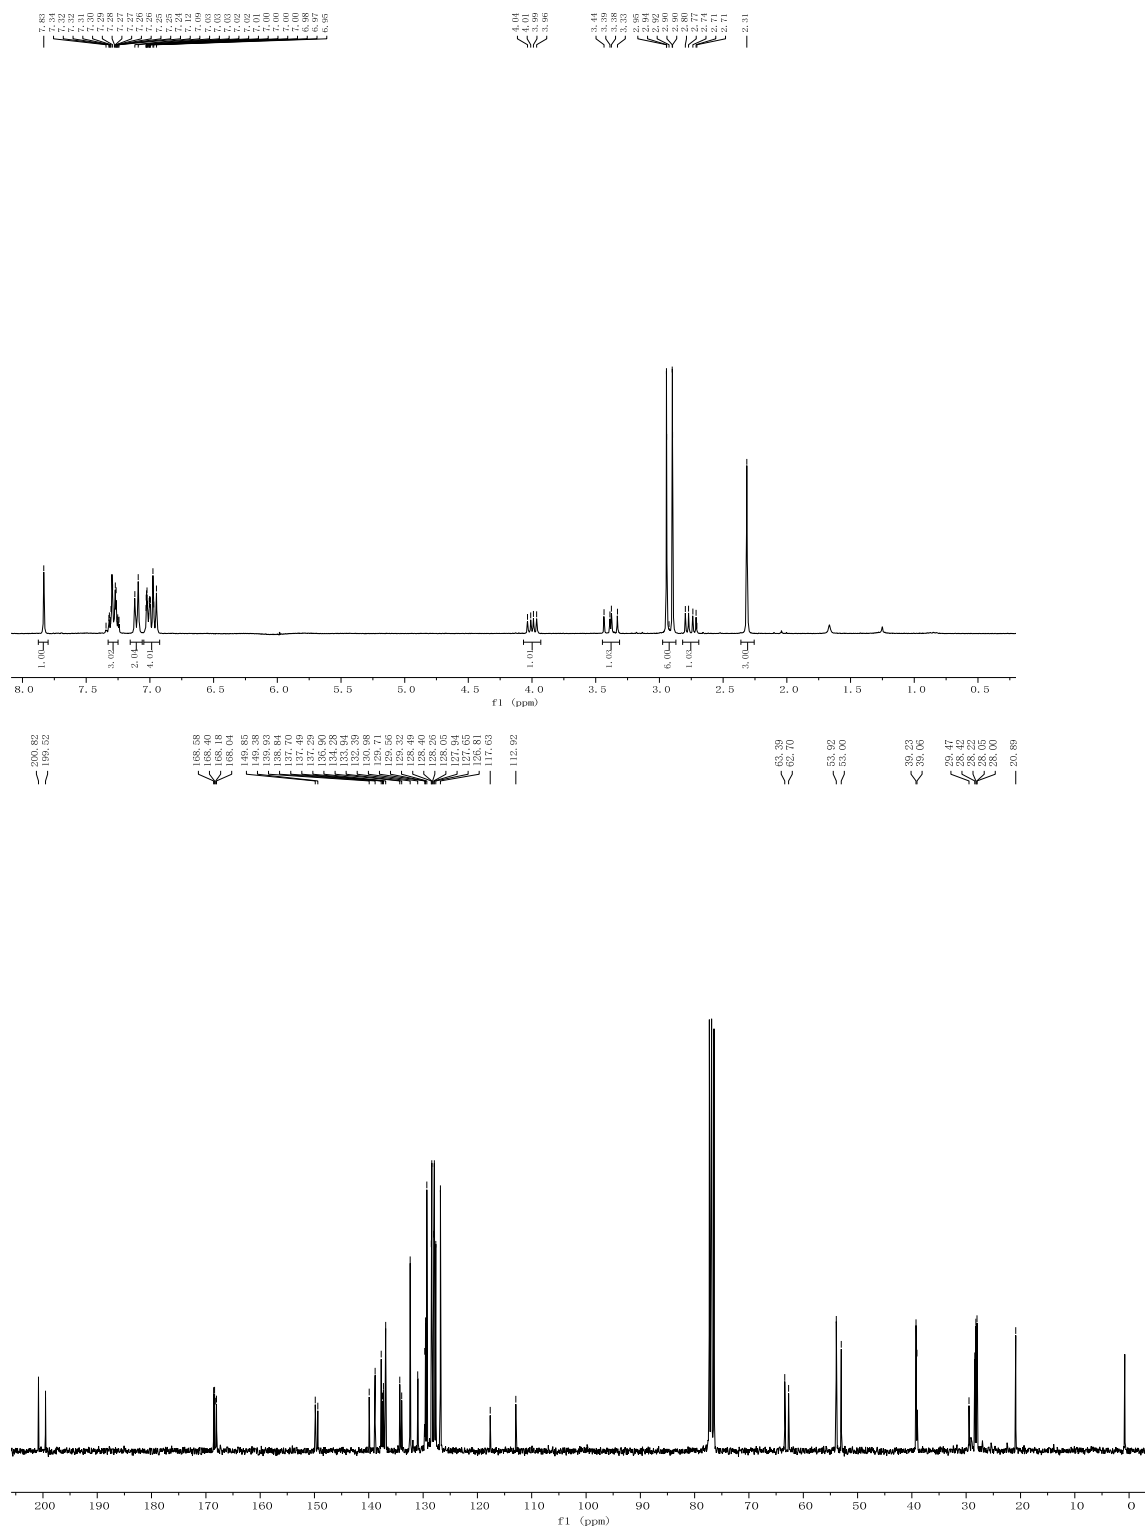

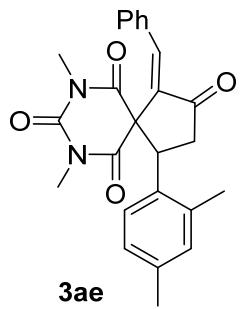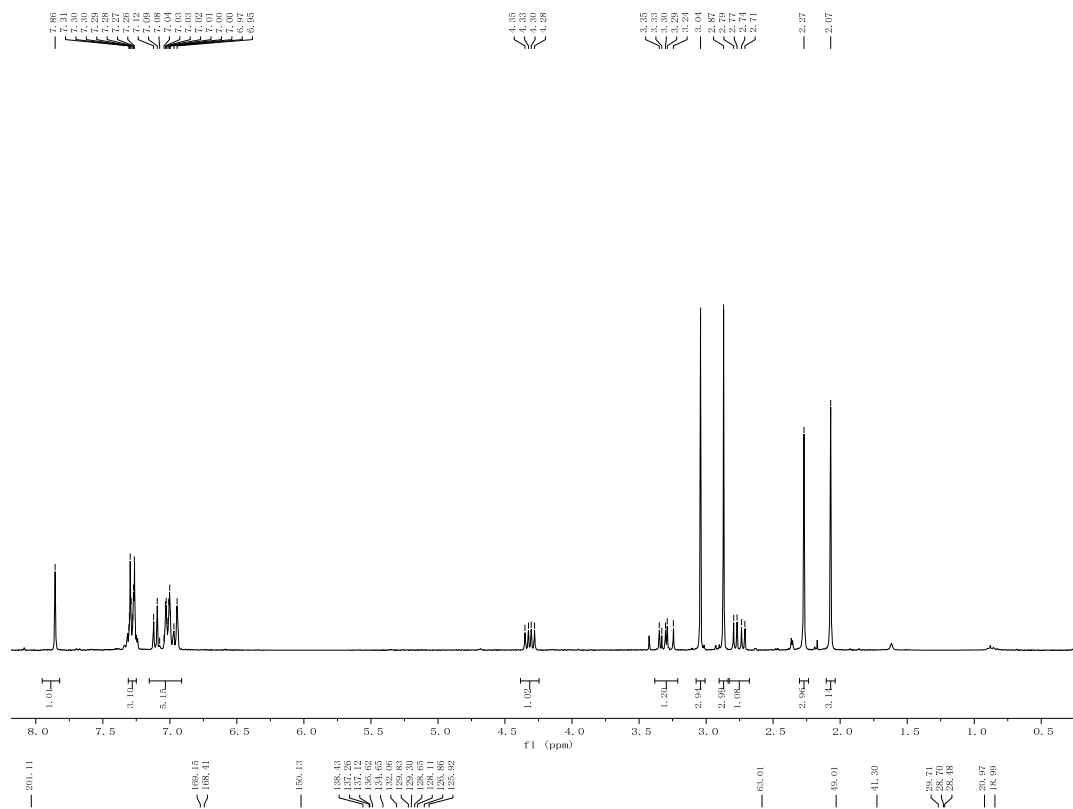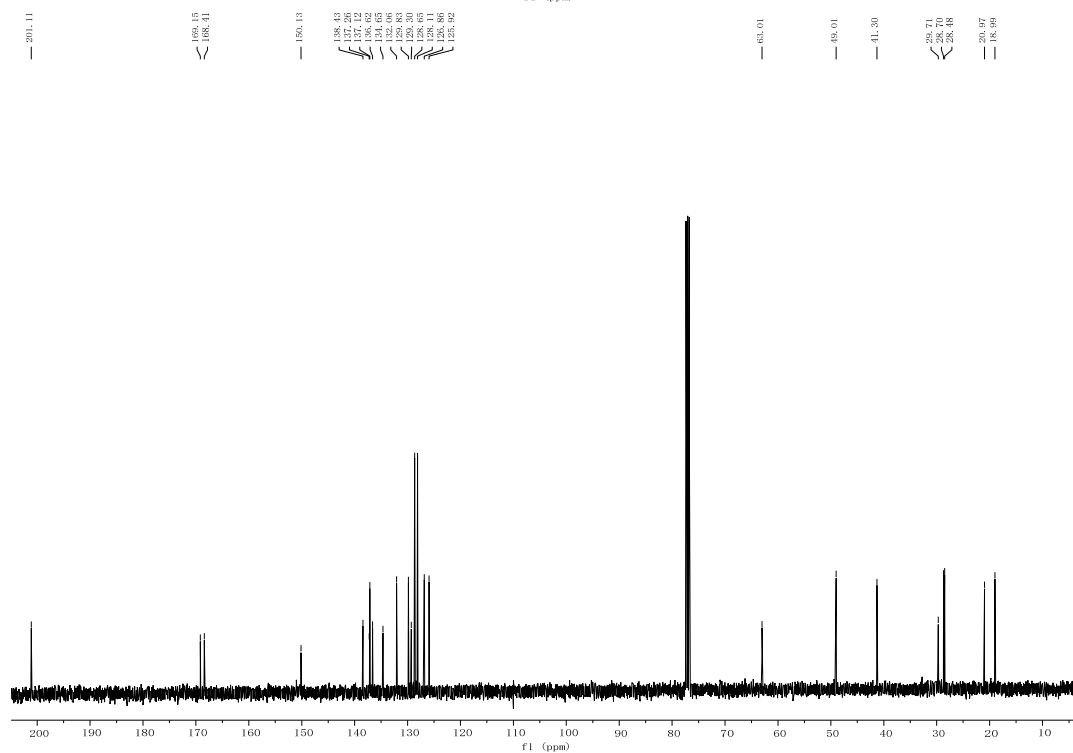

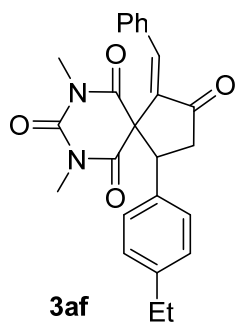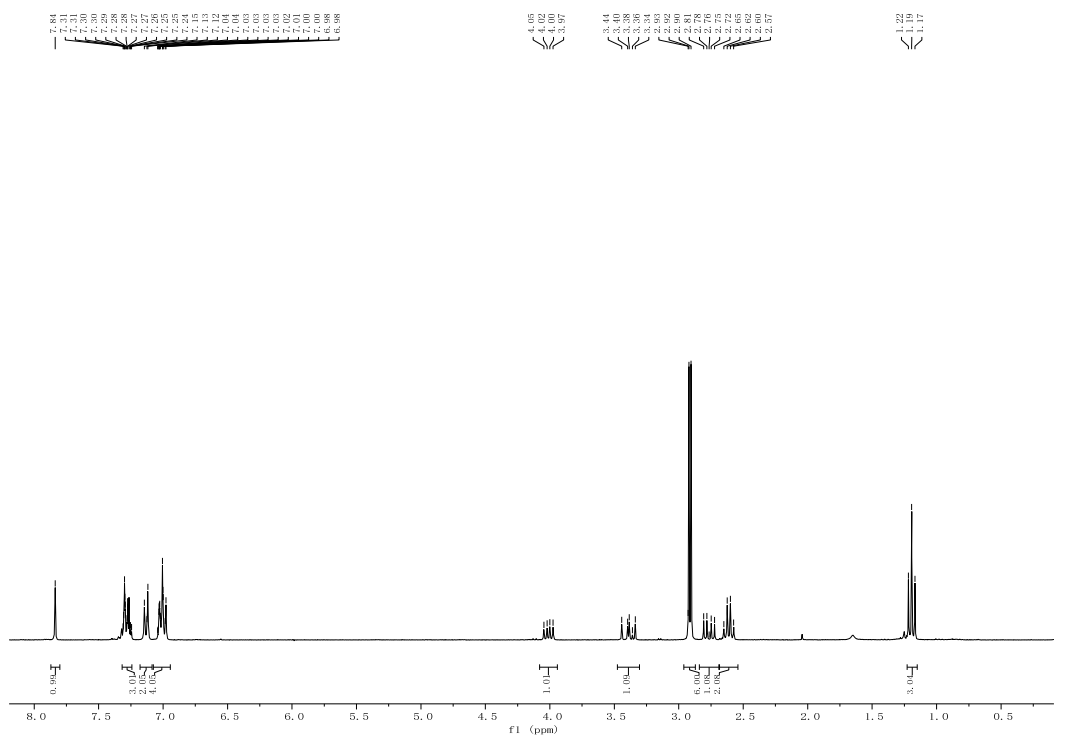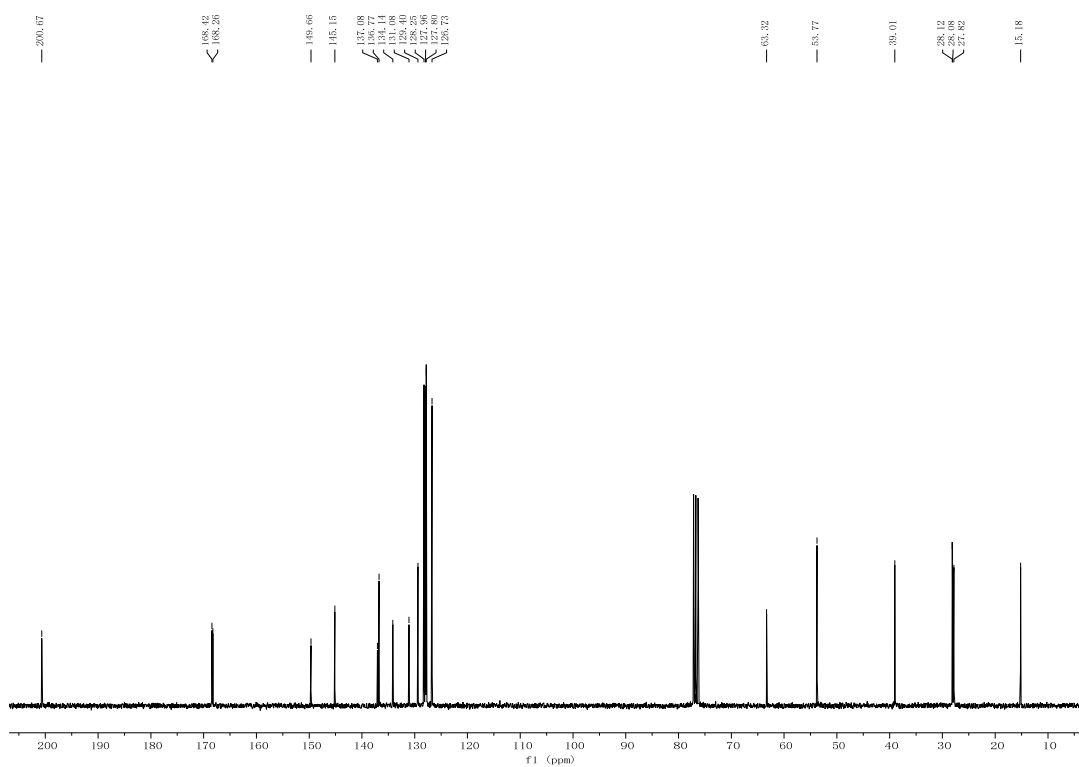

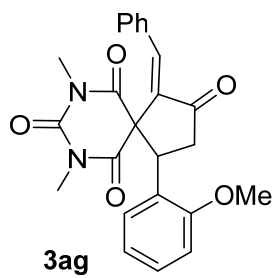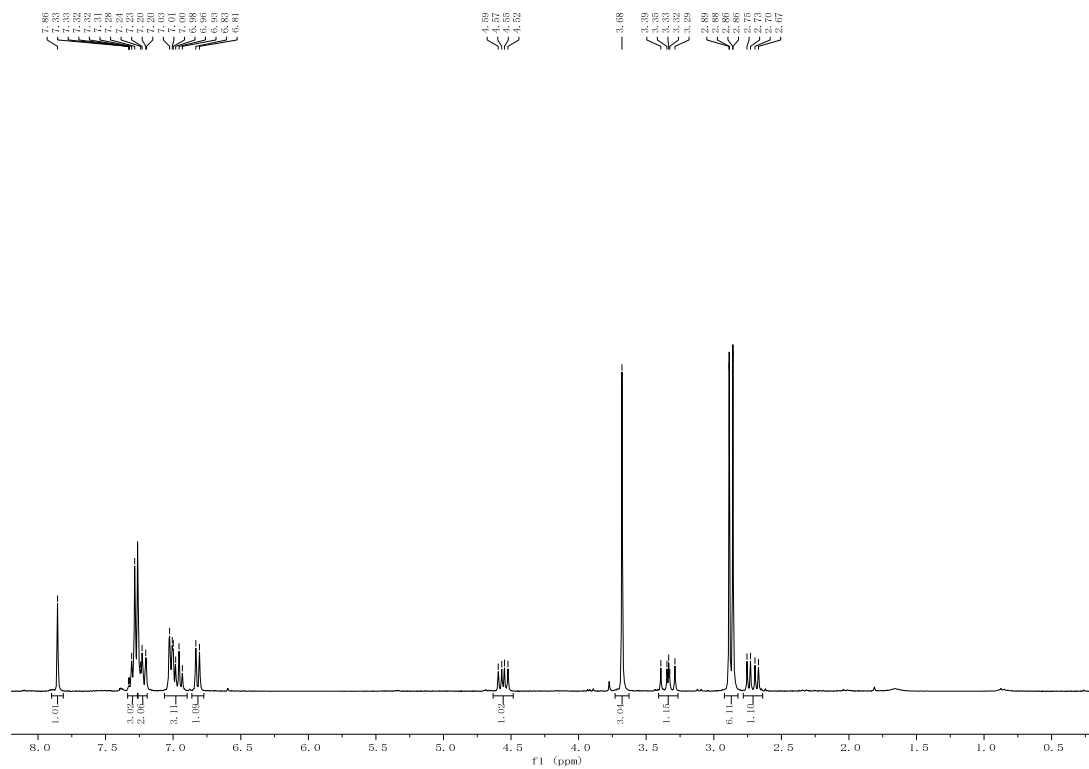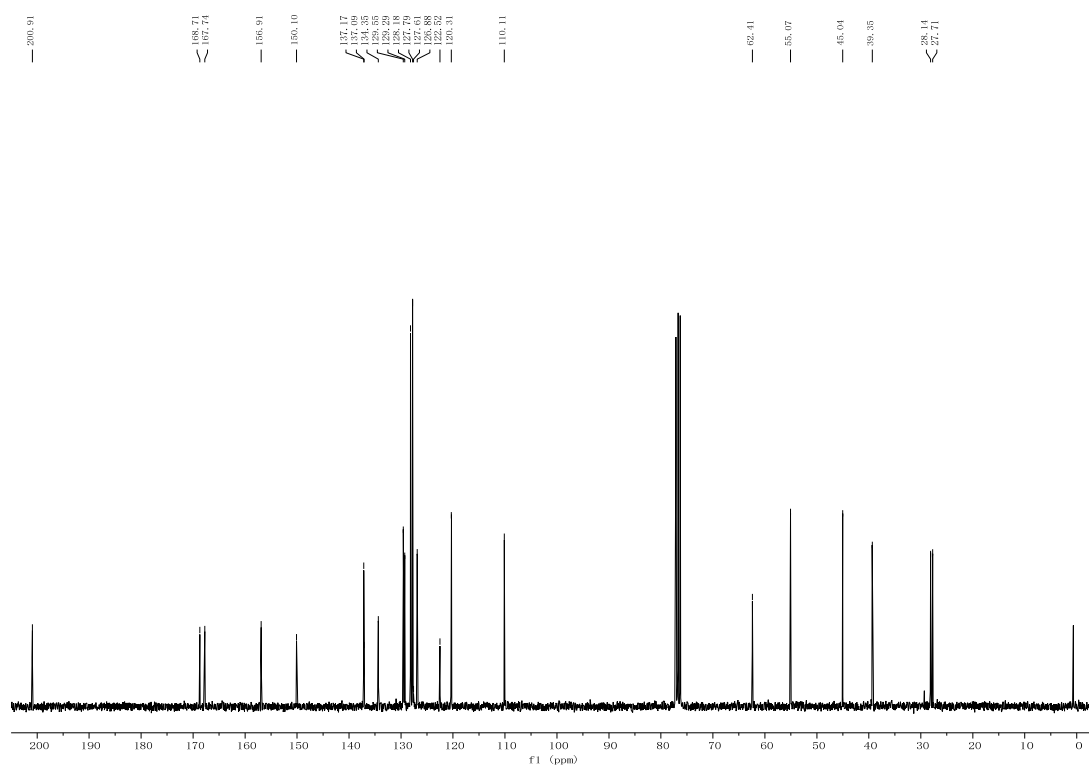



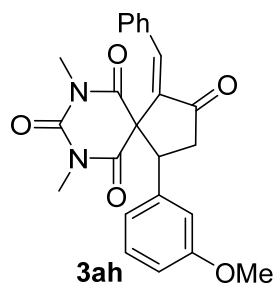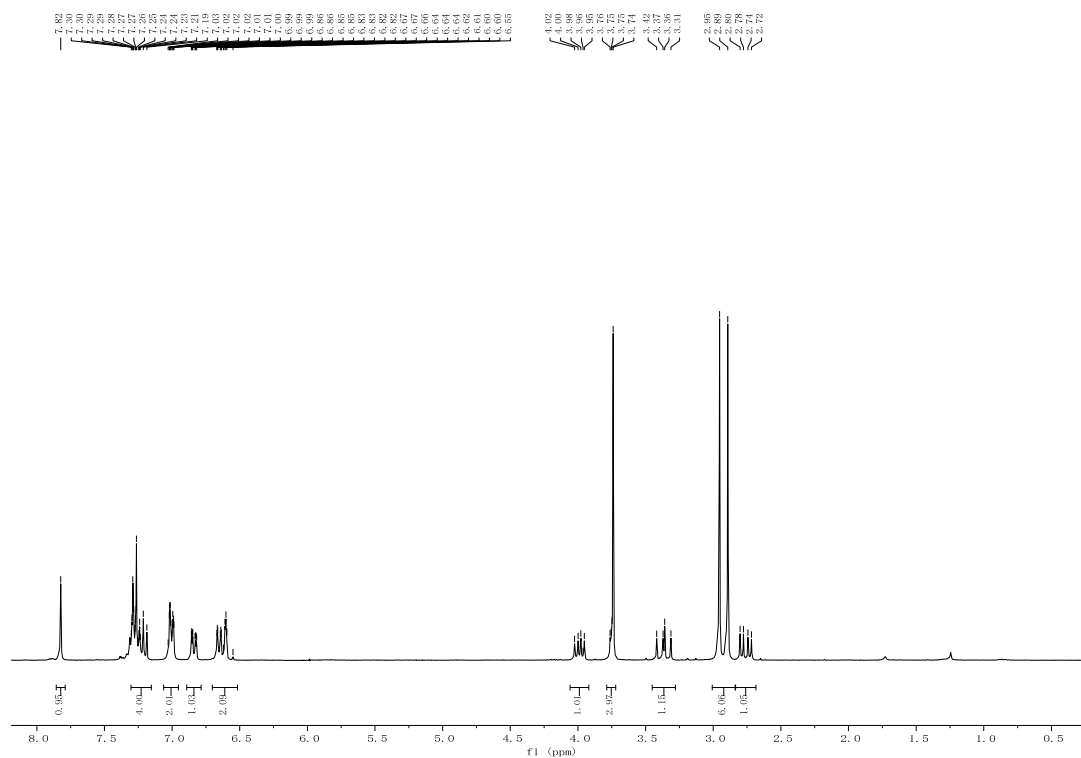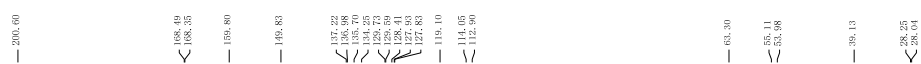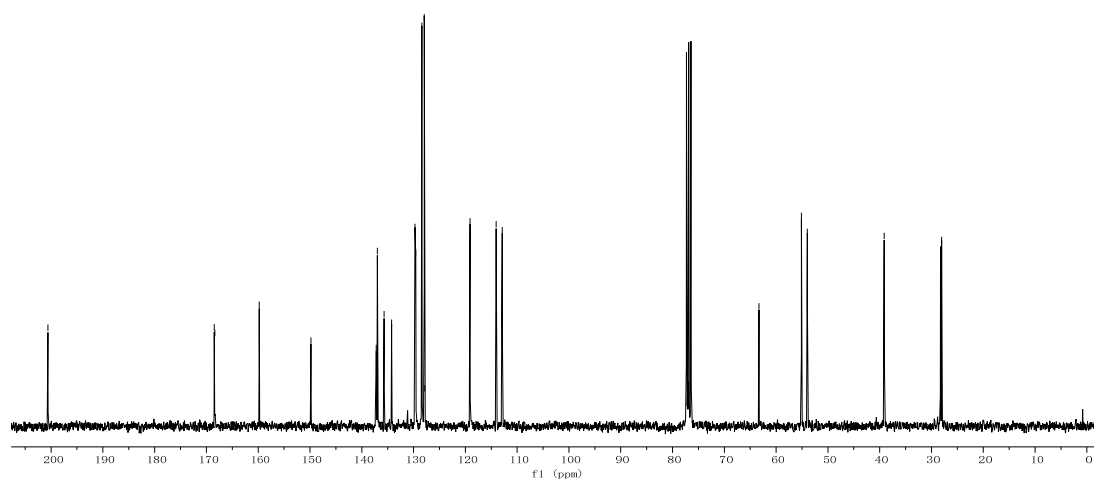

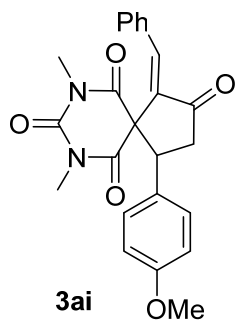

7.483  
7.432  
7.431  
7.431  
7.431  
7.429  
7.429  
7.427  
7.427  
7.426  
7.403  
7.403  
7.400  
7.400  
6.996  
6.984  
6.984  
6.881  
6.881  
6.879

4.103  
4.100  
3.996  
3.978  
3.41  
3.397  
3.397  
3.331  
3.068  
2.880  
2.874  
2.71

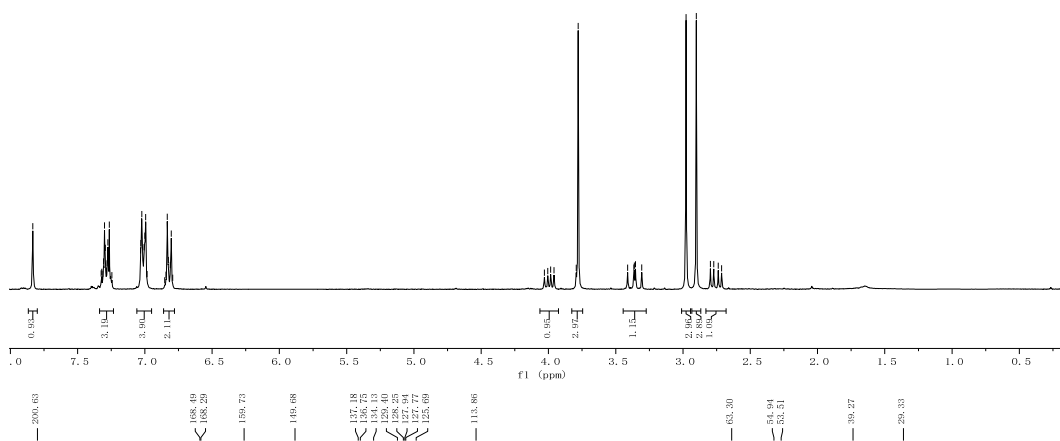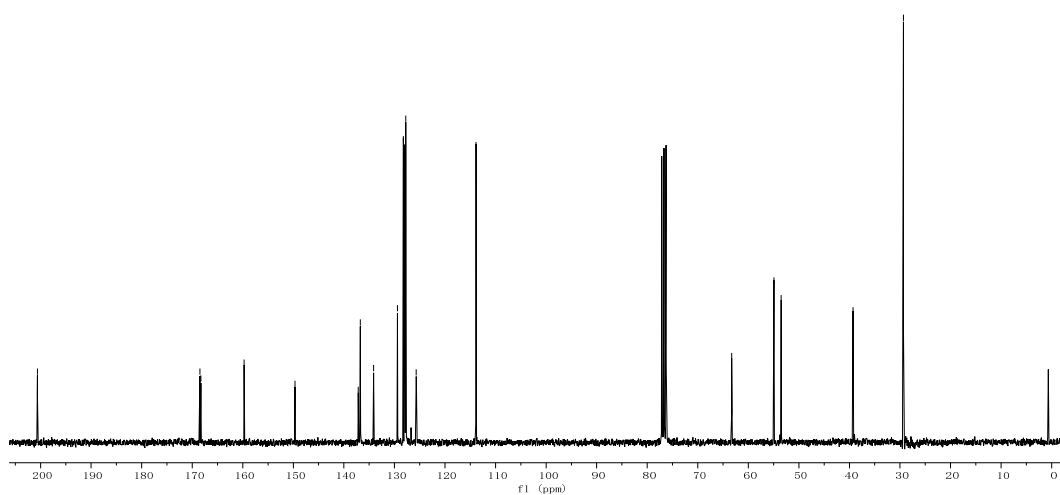

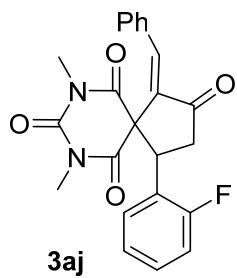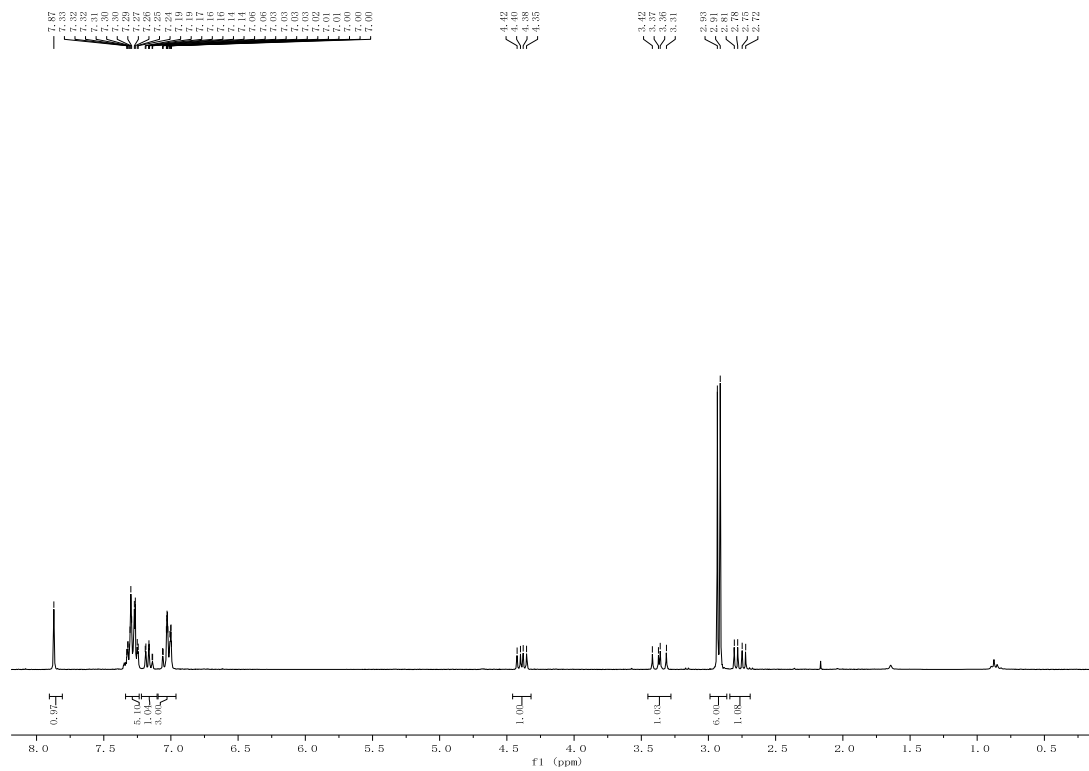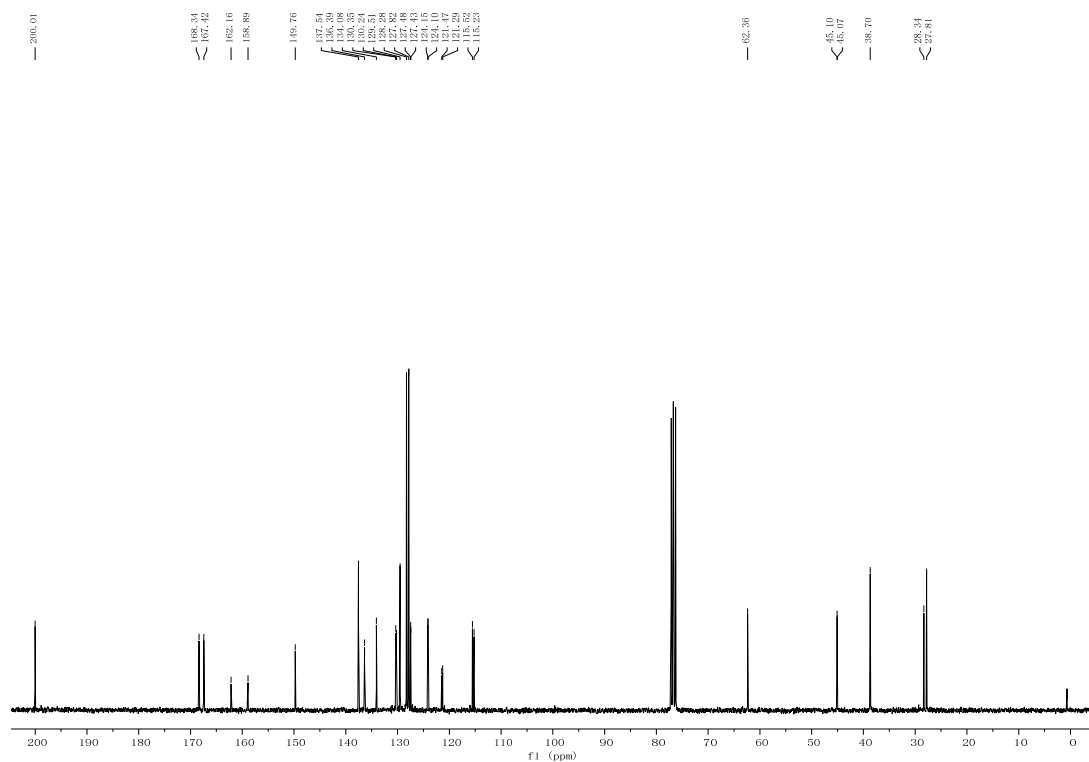

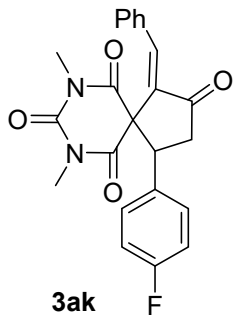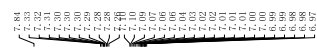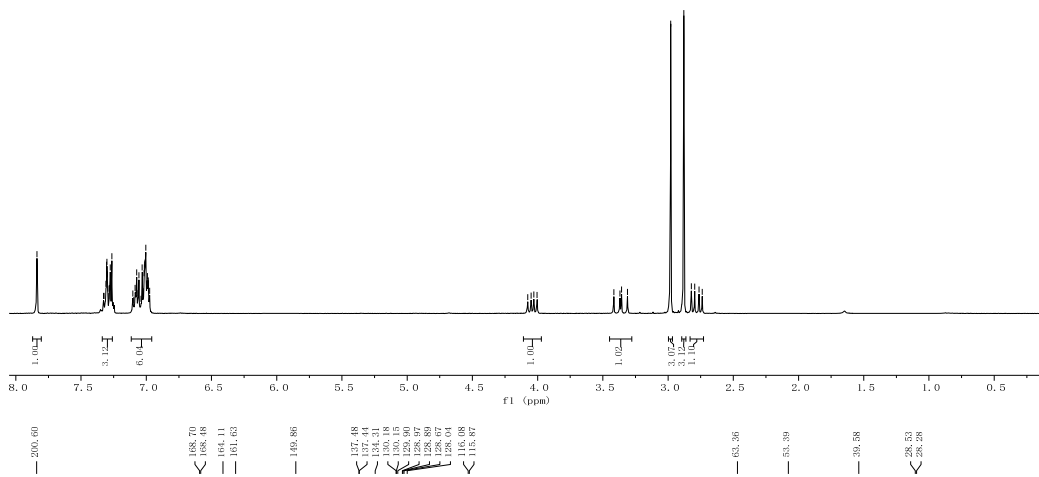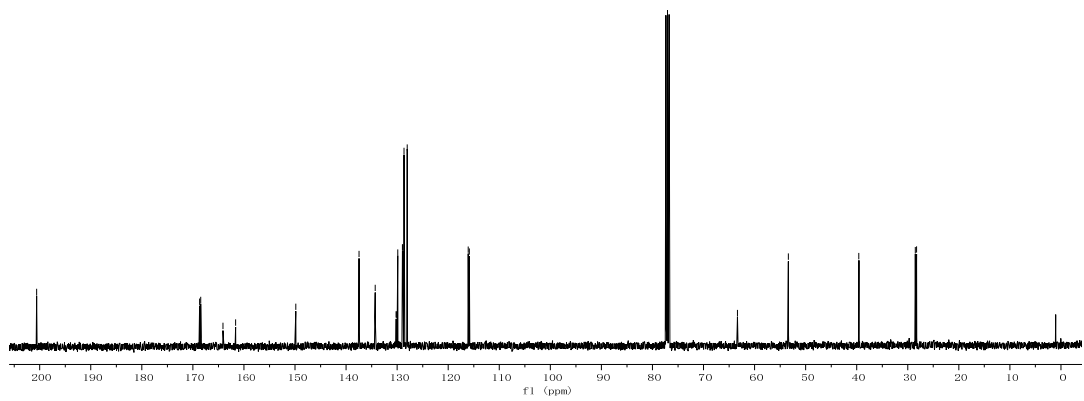

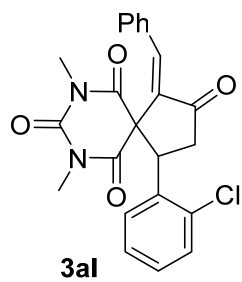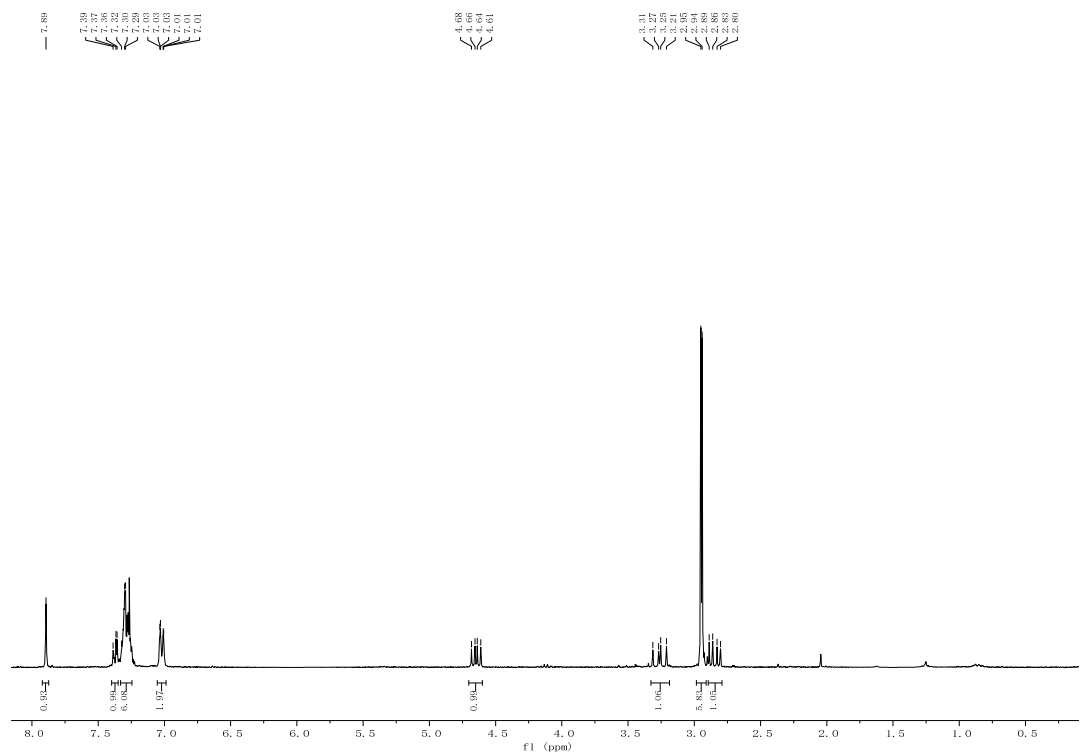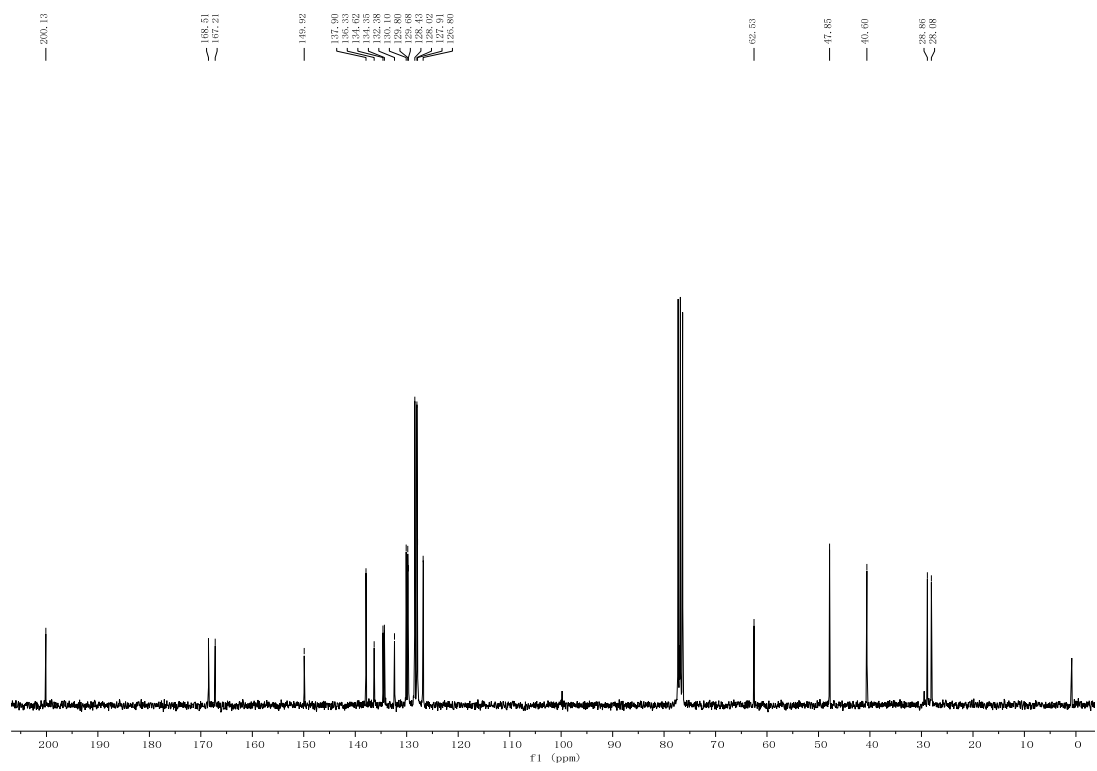

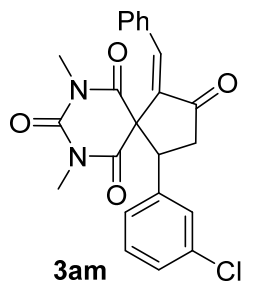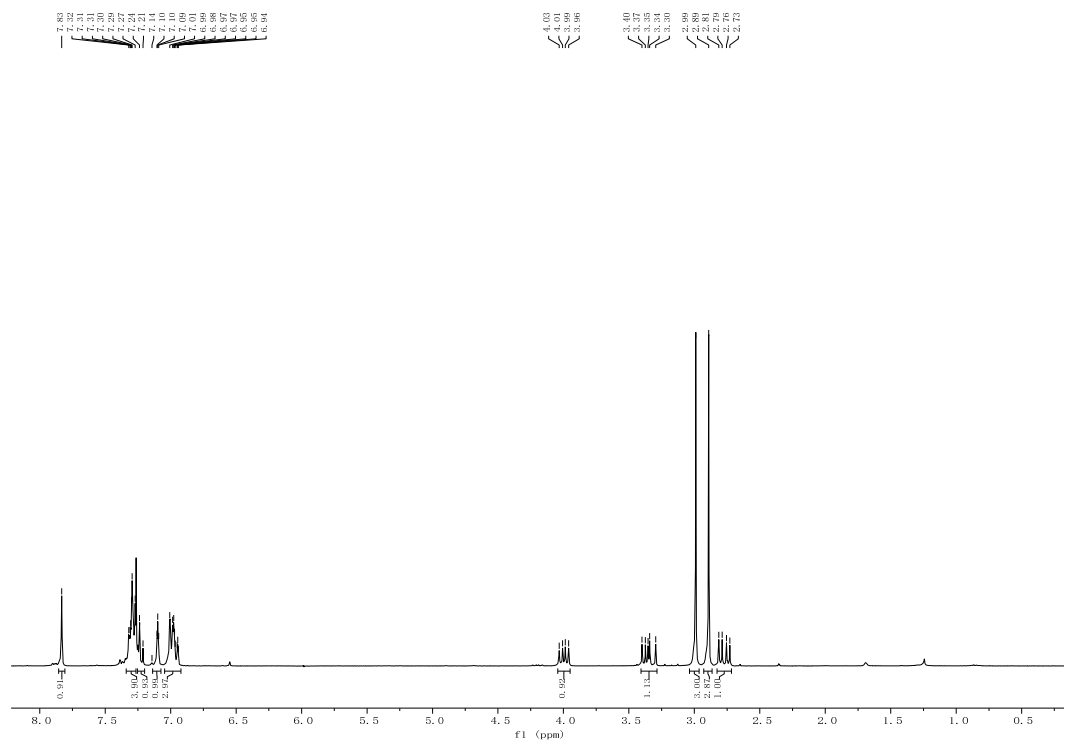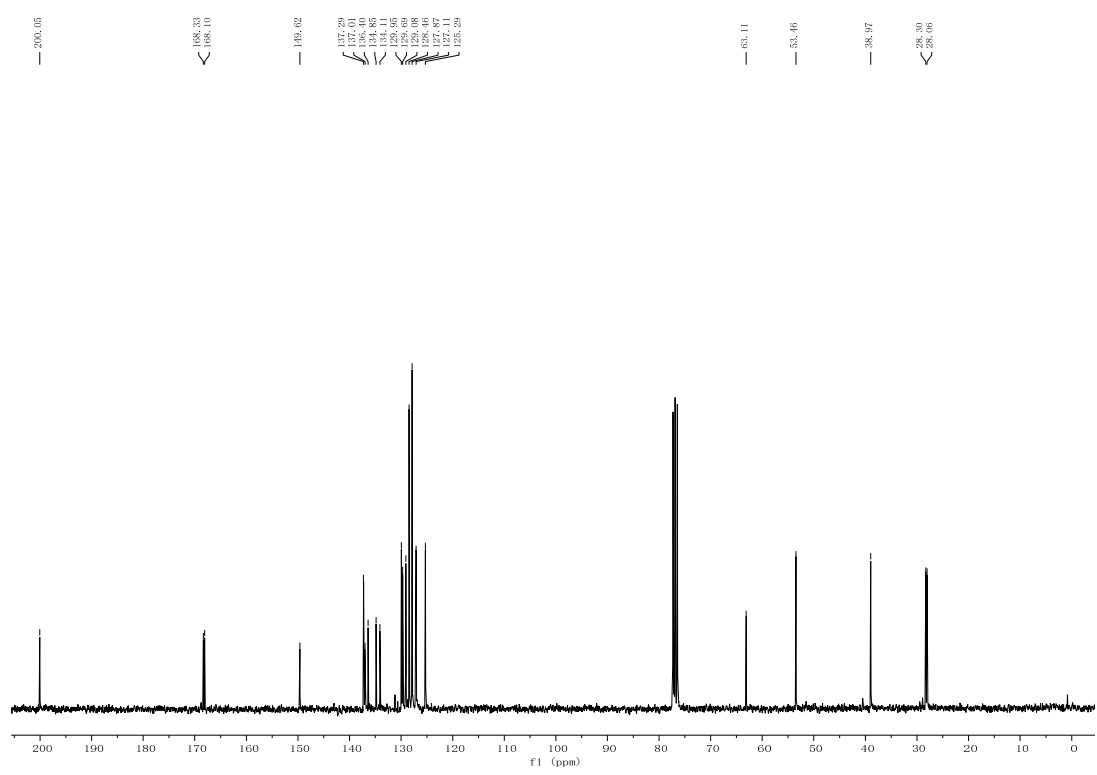

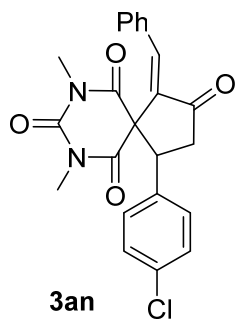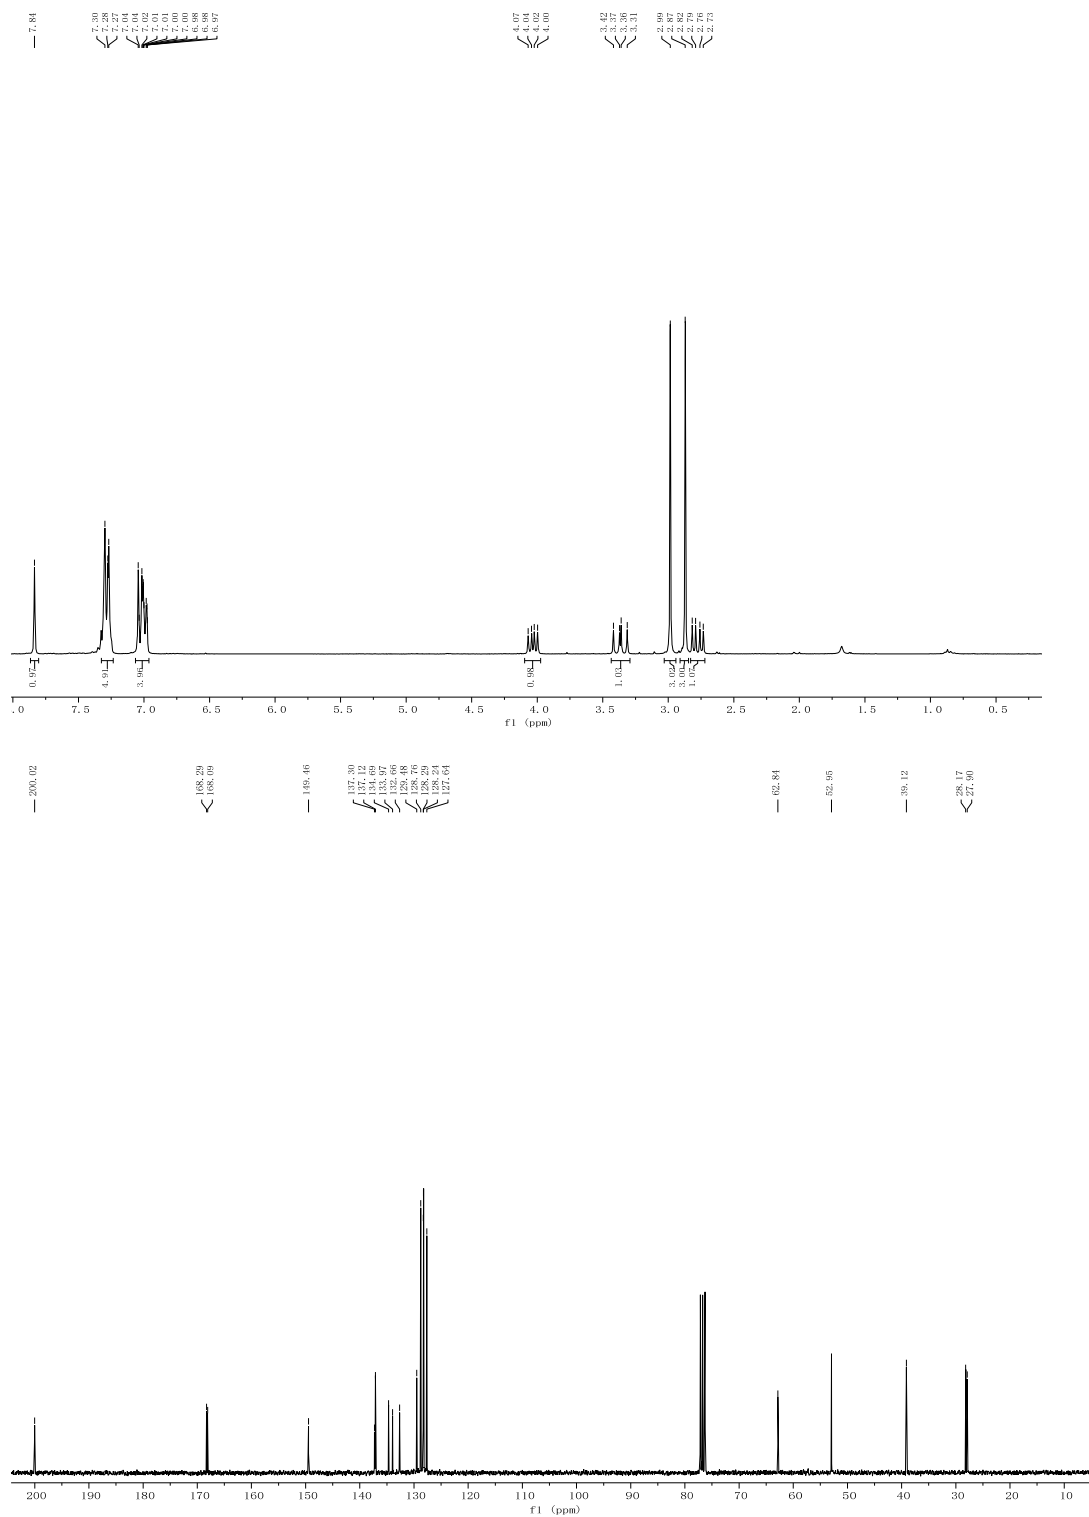

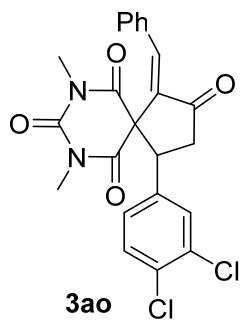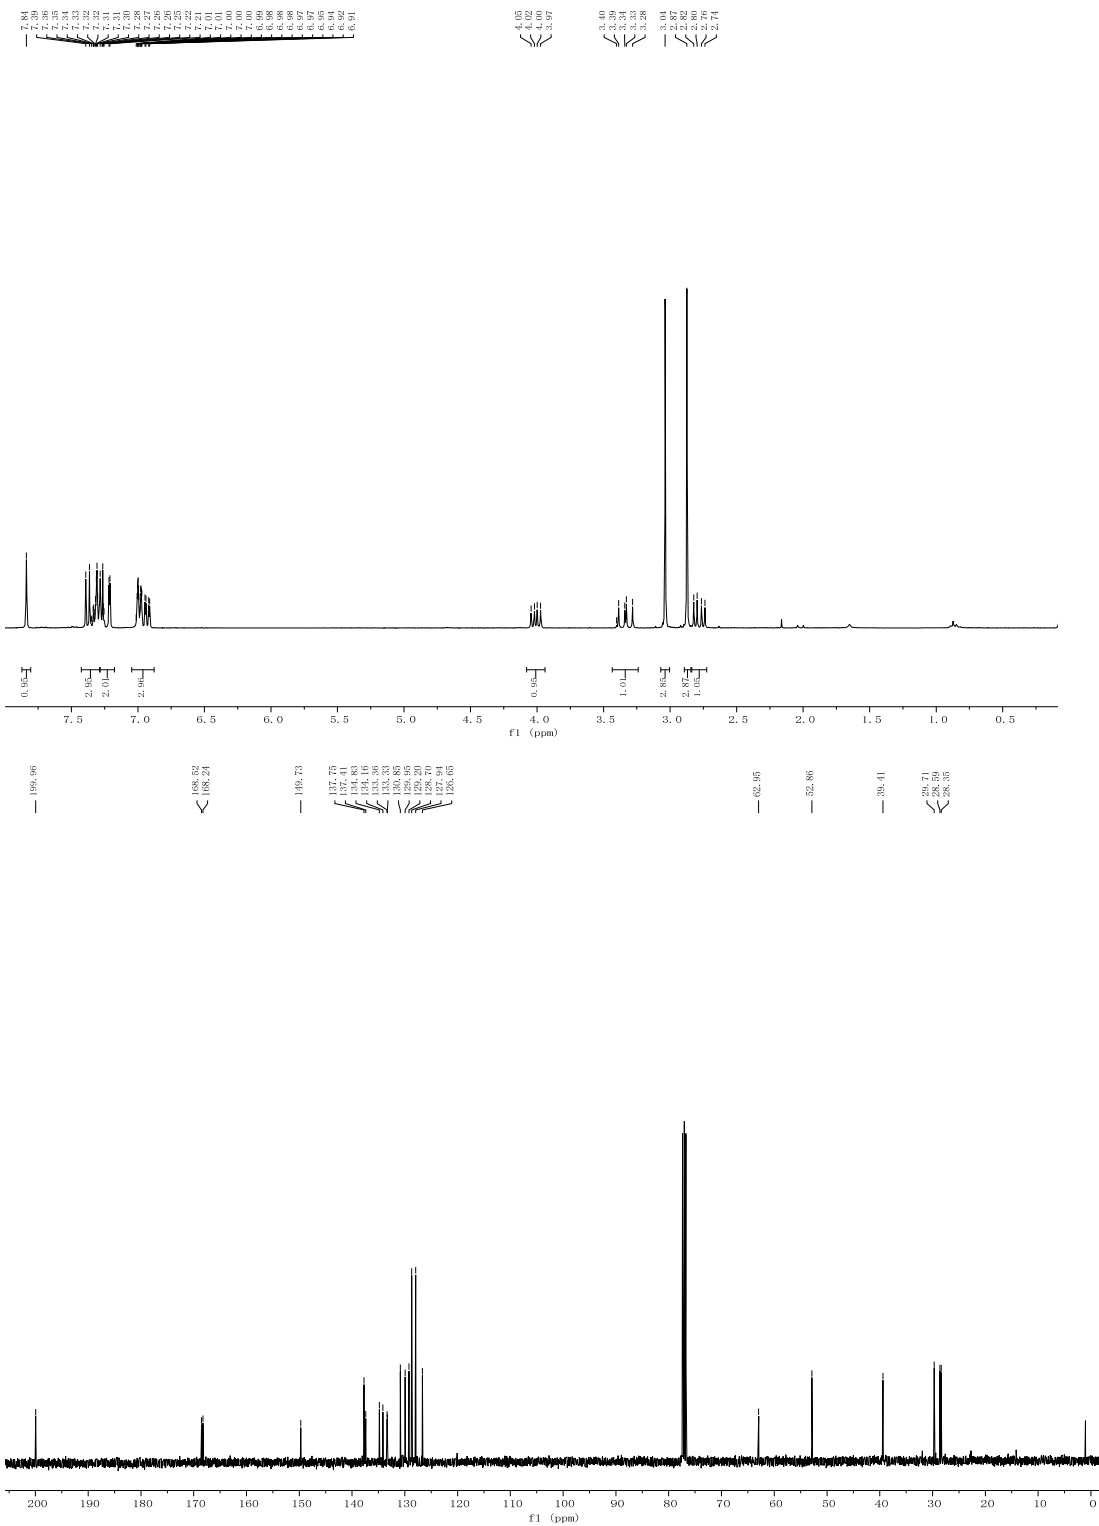



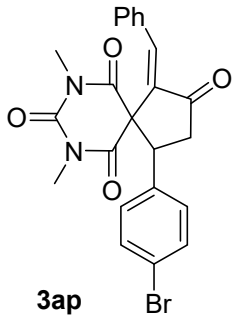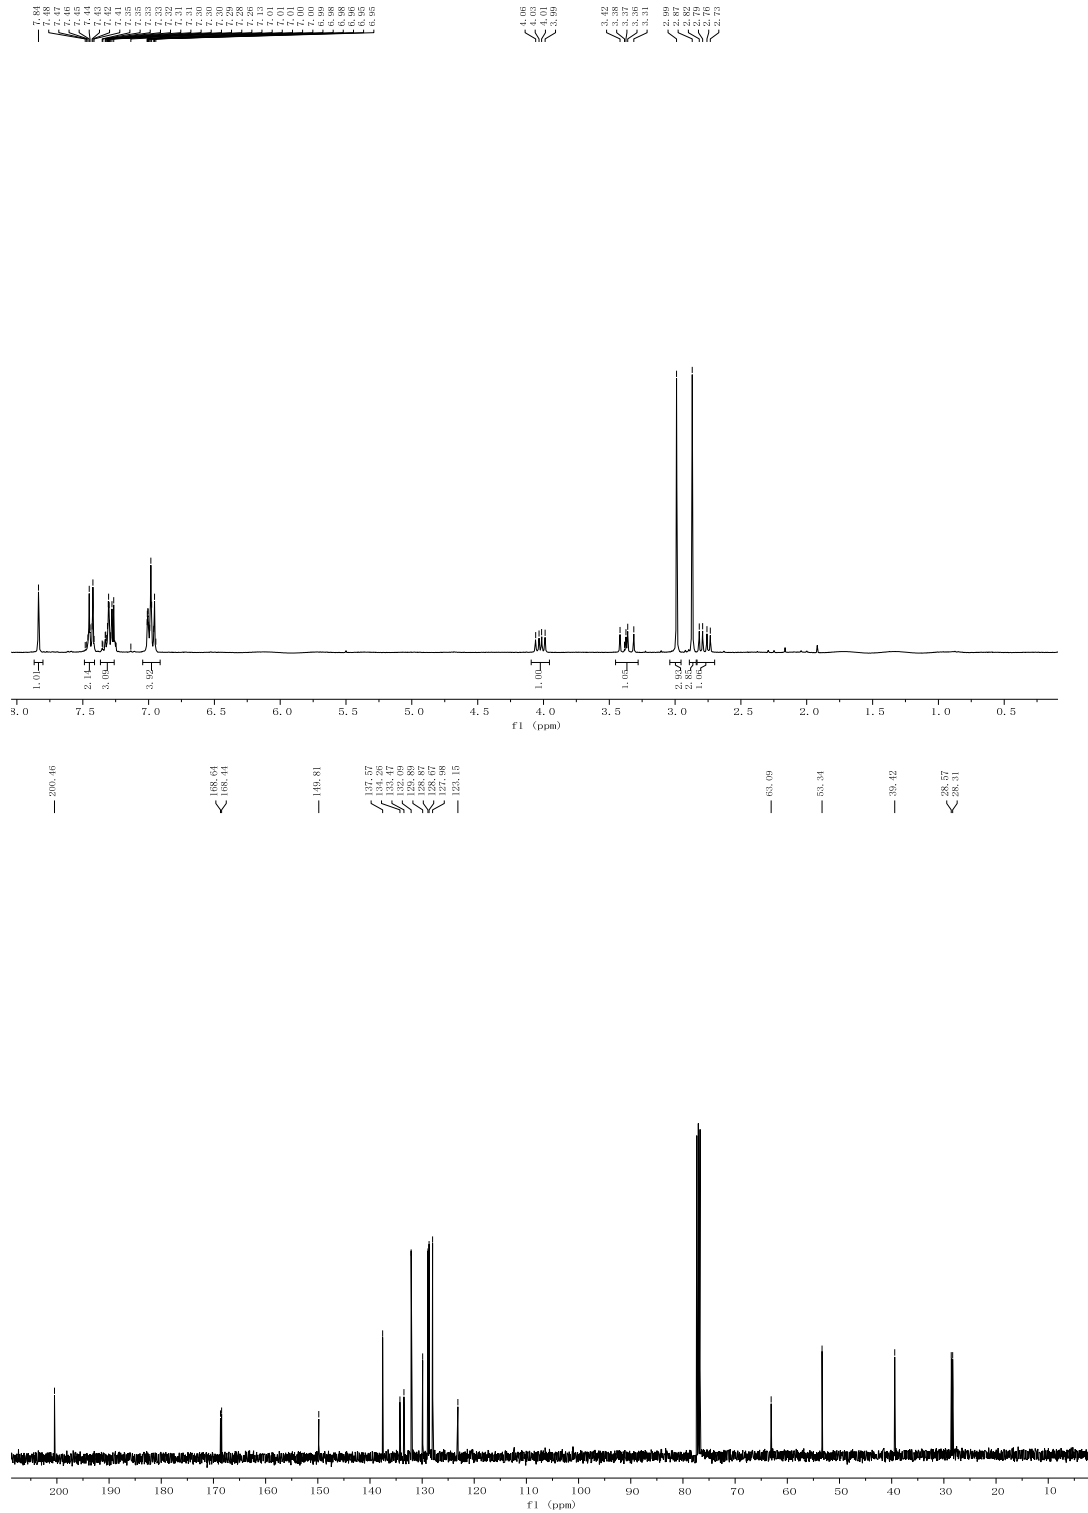

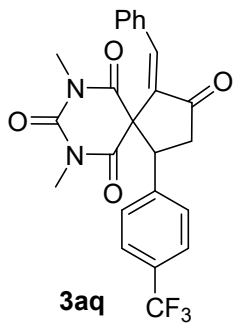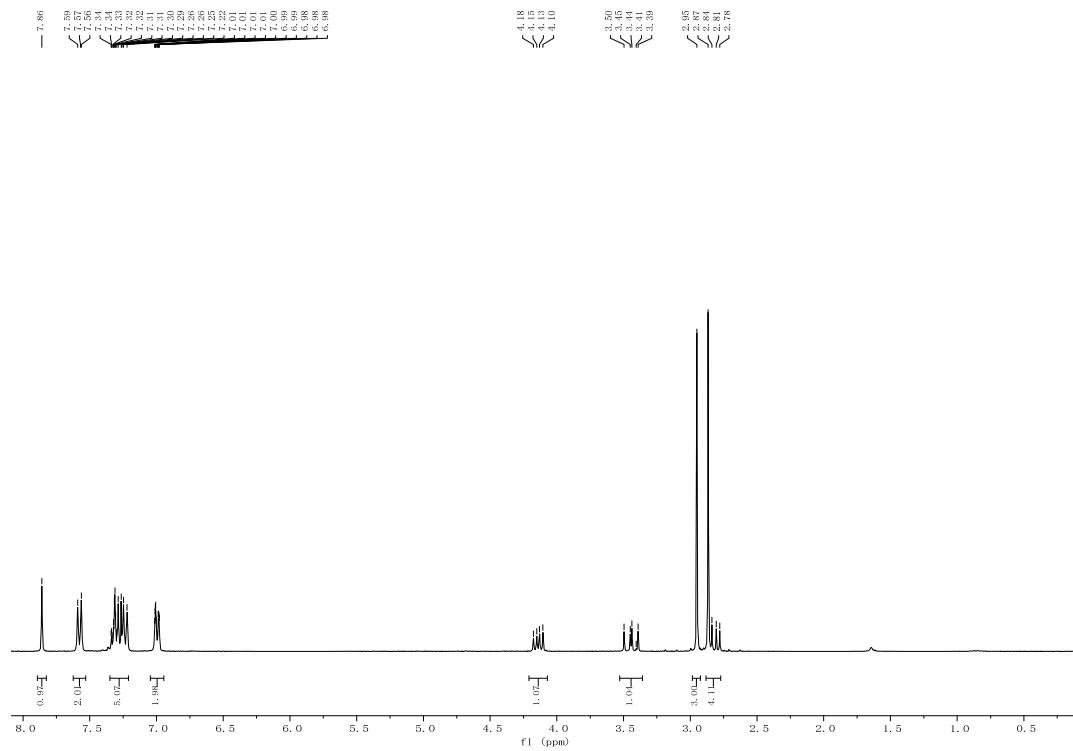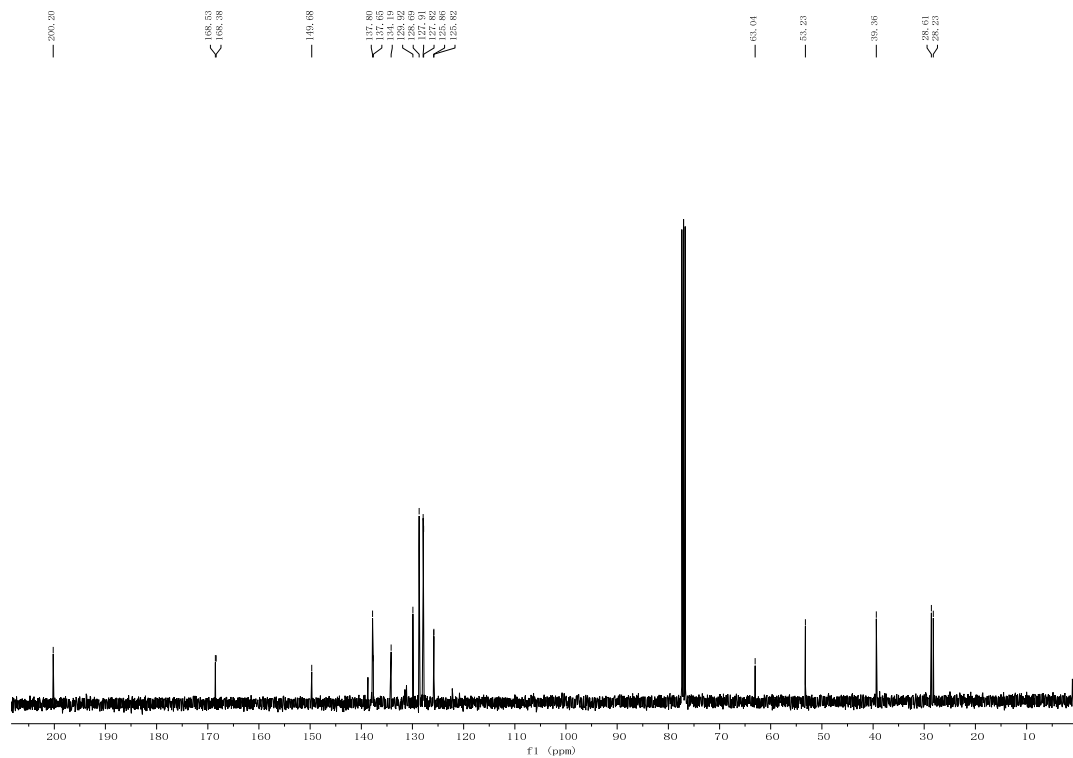

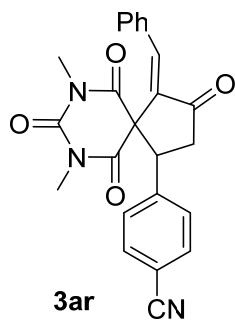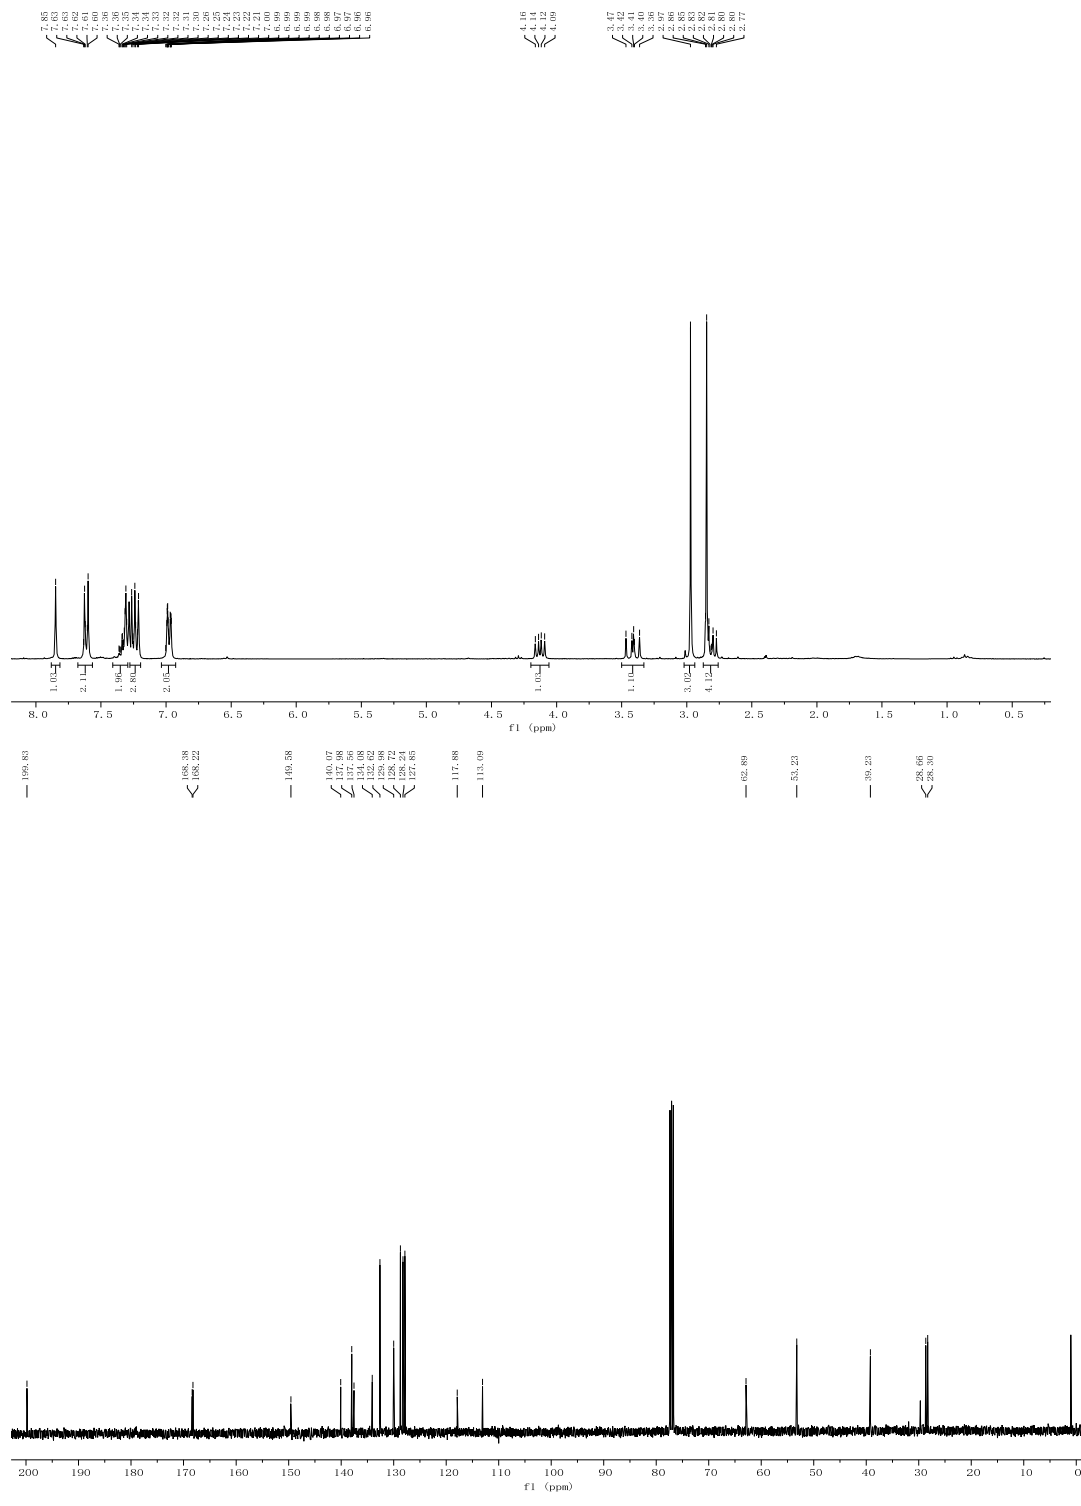

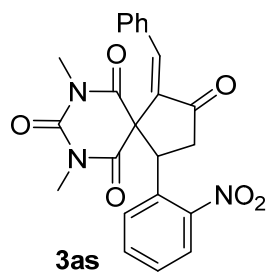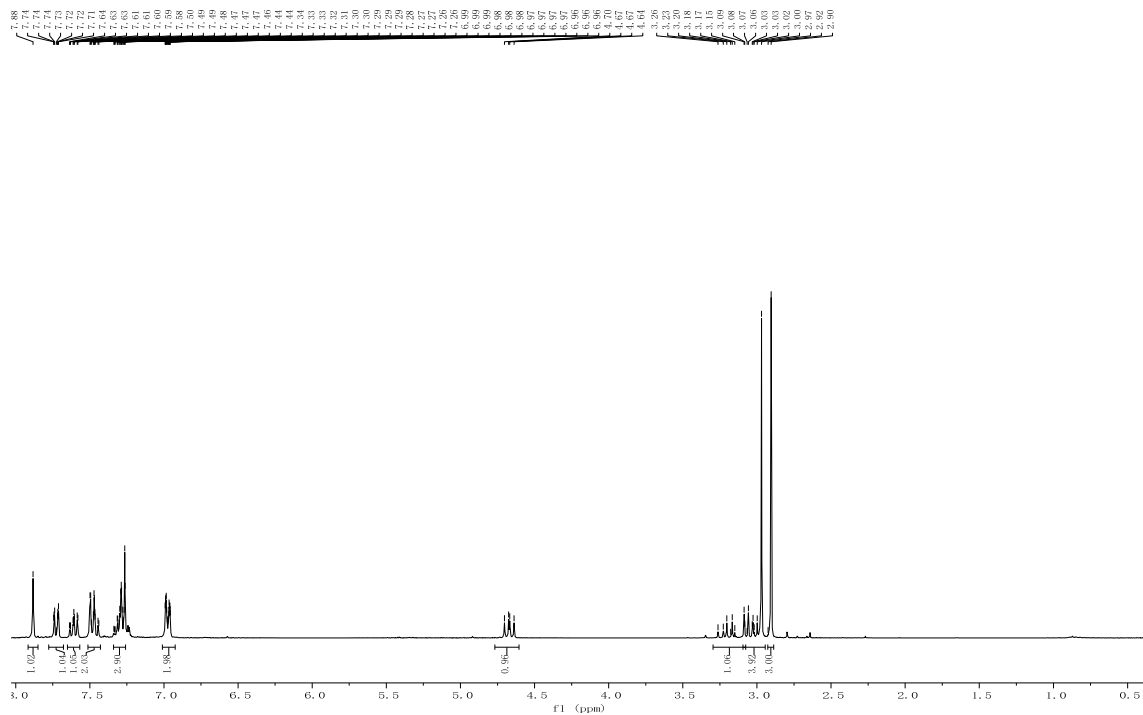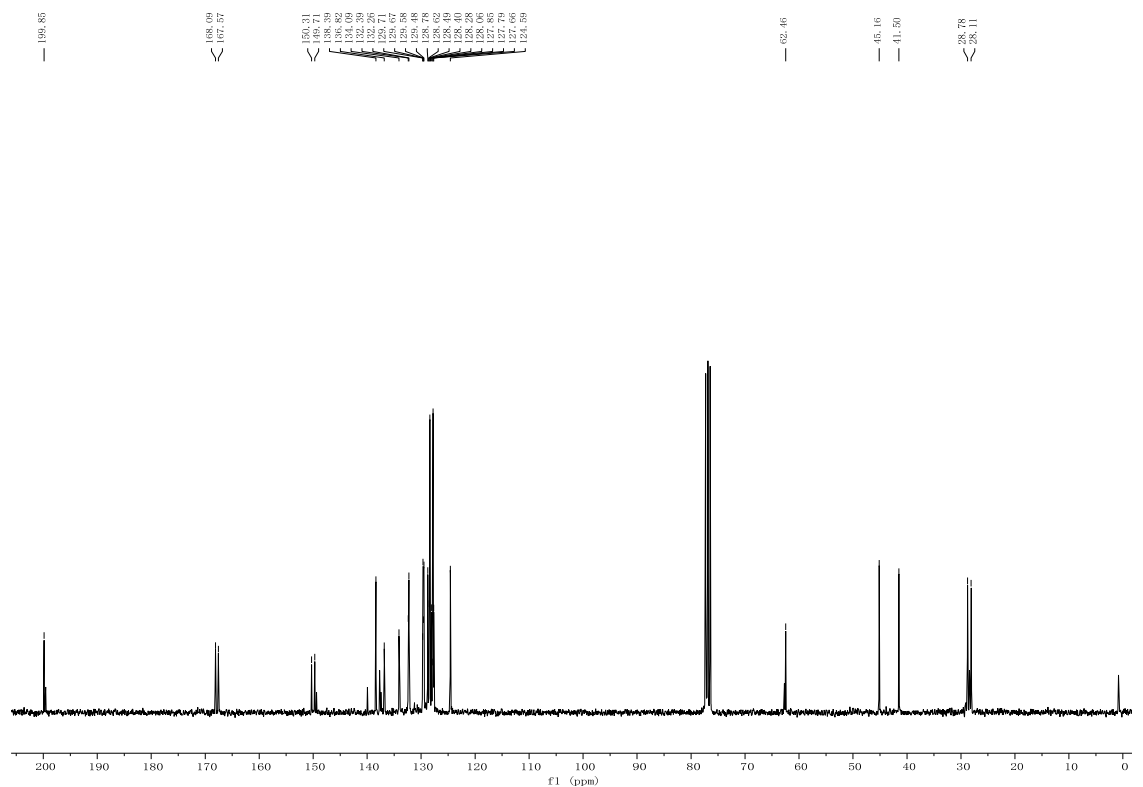

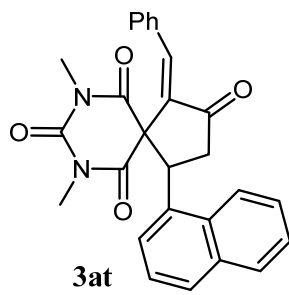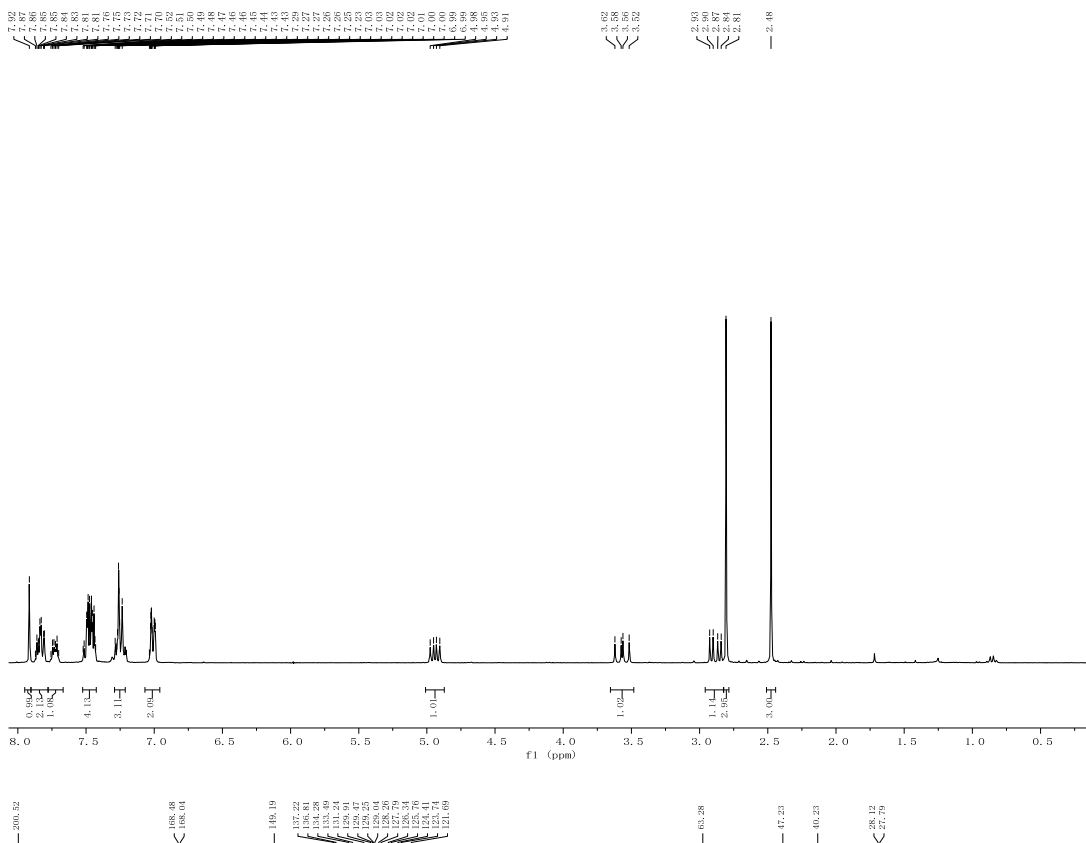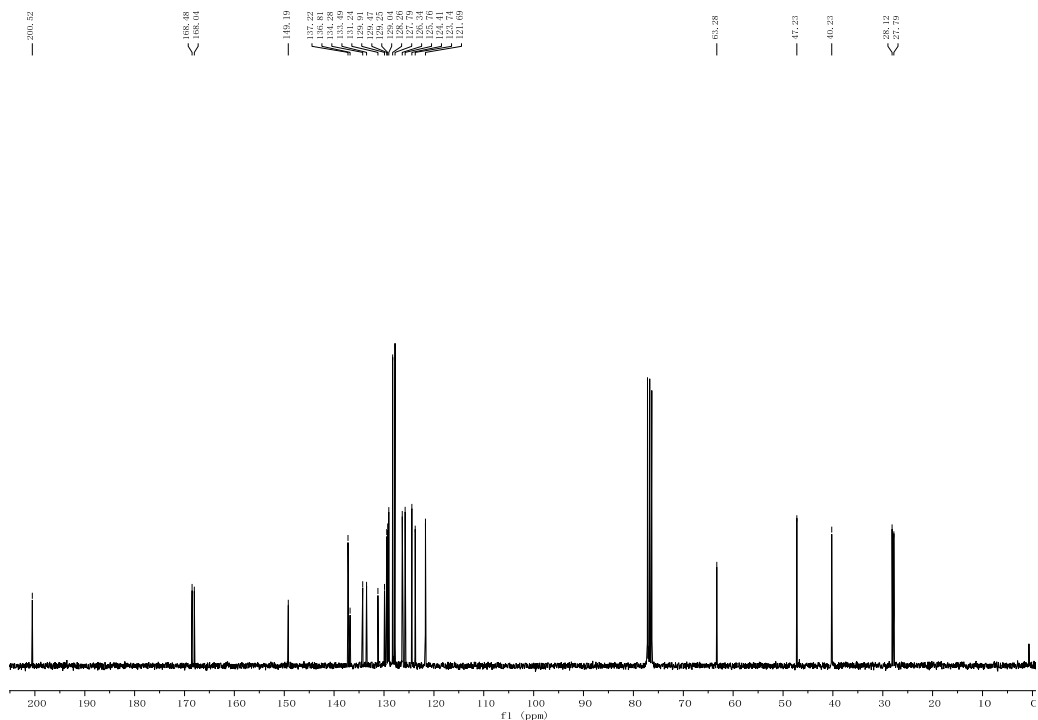

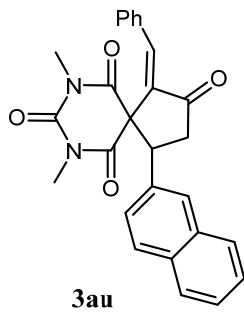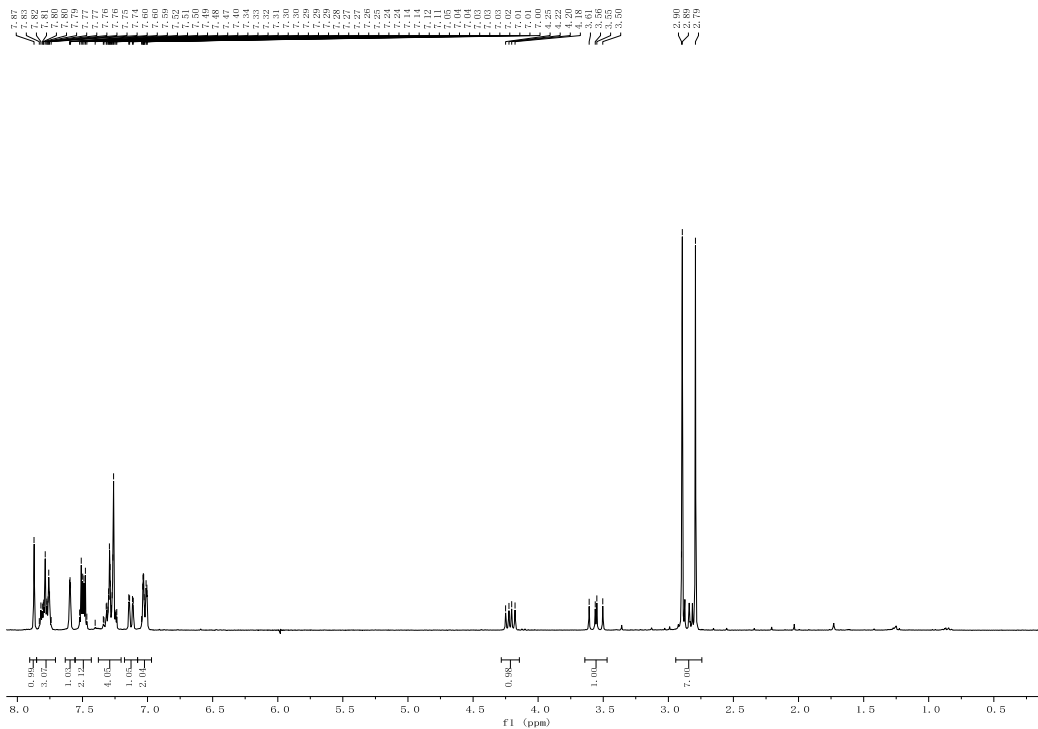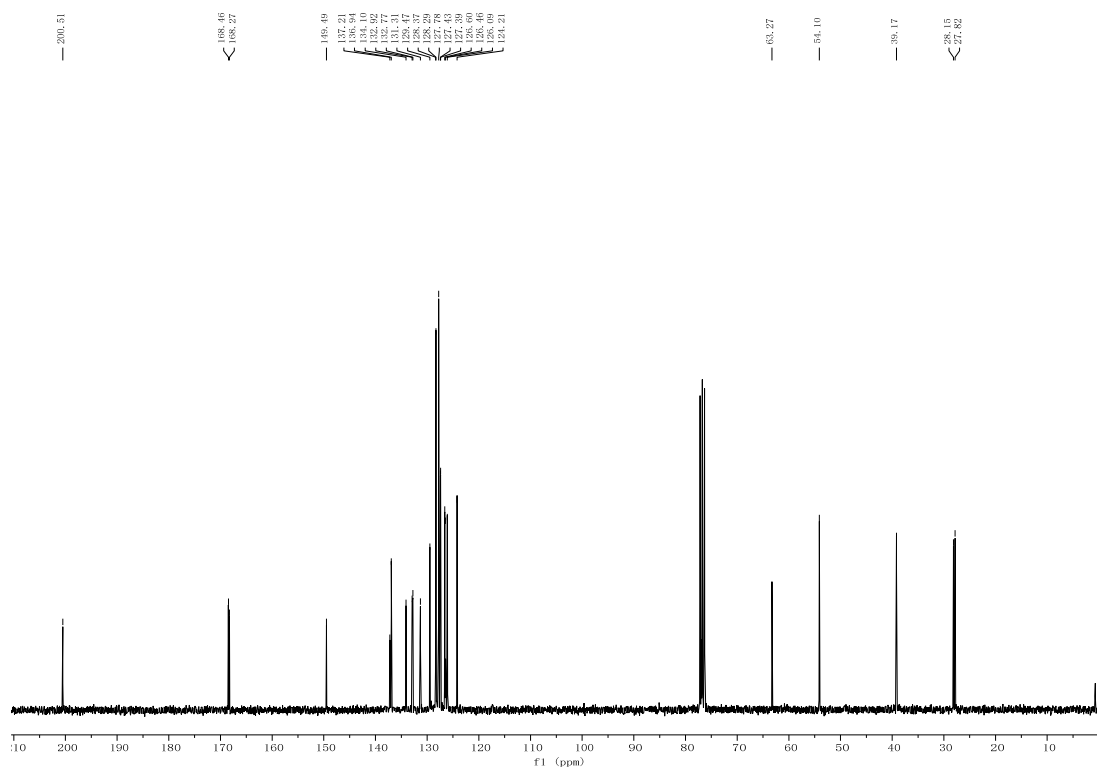

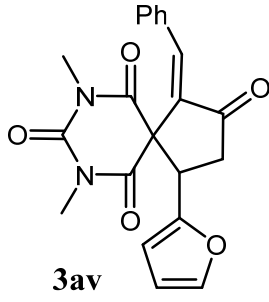

7.822  
7.782  
7.736  
7.735  
7.734  
7.733  
7.732  
7.731  
7.730  
7.729  
7.728  
7.727  
7.726  
7.725  
7.724  
7.723  
7.722  
7.721  
7.720  
7.719  
7.718  
7.717  
7.716  
7.715  
7.714  
7.713  
7.712  
7.711  
7.710  
7.709  
7.708  
7.707  
7.706  
7.705  
7.704  
7.703  
7.702  
7.701  
7.700  
7.699  
7.698  
7.697  
7.696  
7.695  
7.694  
7.693  
7.692  
7.691  
7.690  
7.689  
7.688  
7.687  
7.686  
7.685  
7.684  
7.683  
7.682

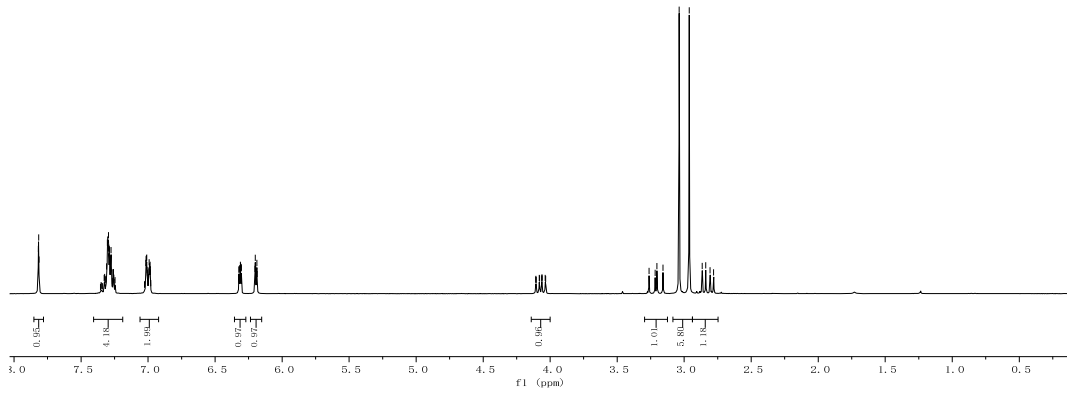

199.57  
198.69  
197.89  
150.09  
149.69  
142.86  
137.69  
136.49  
133.82  
129.82  
127.75  
110.41  
108.03  
61.62  
46.78  
36.11  
28.36  
26.15

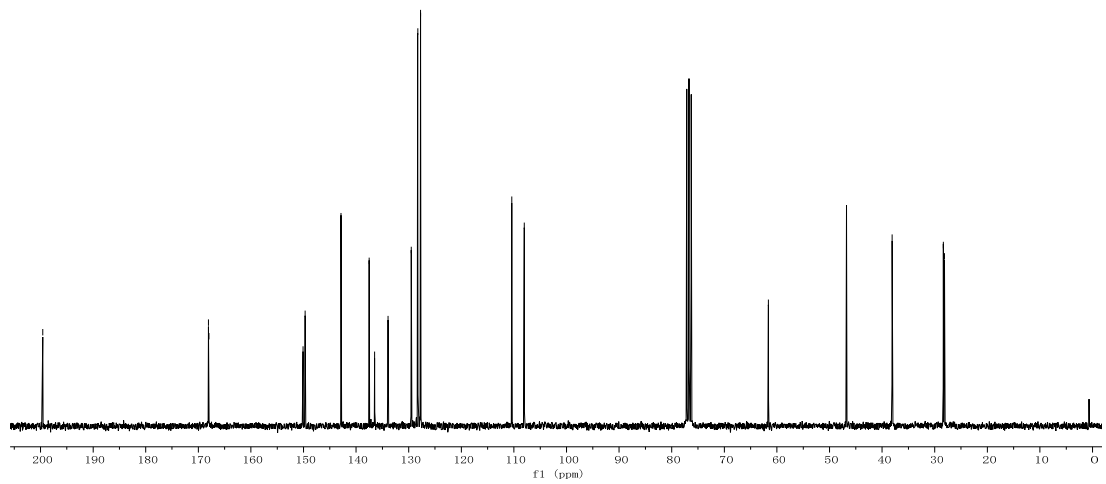

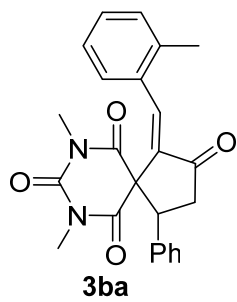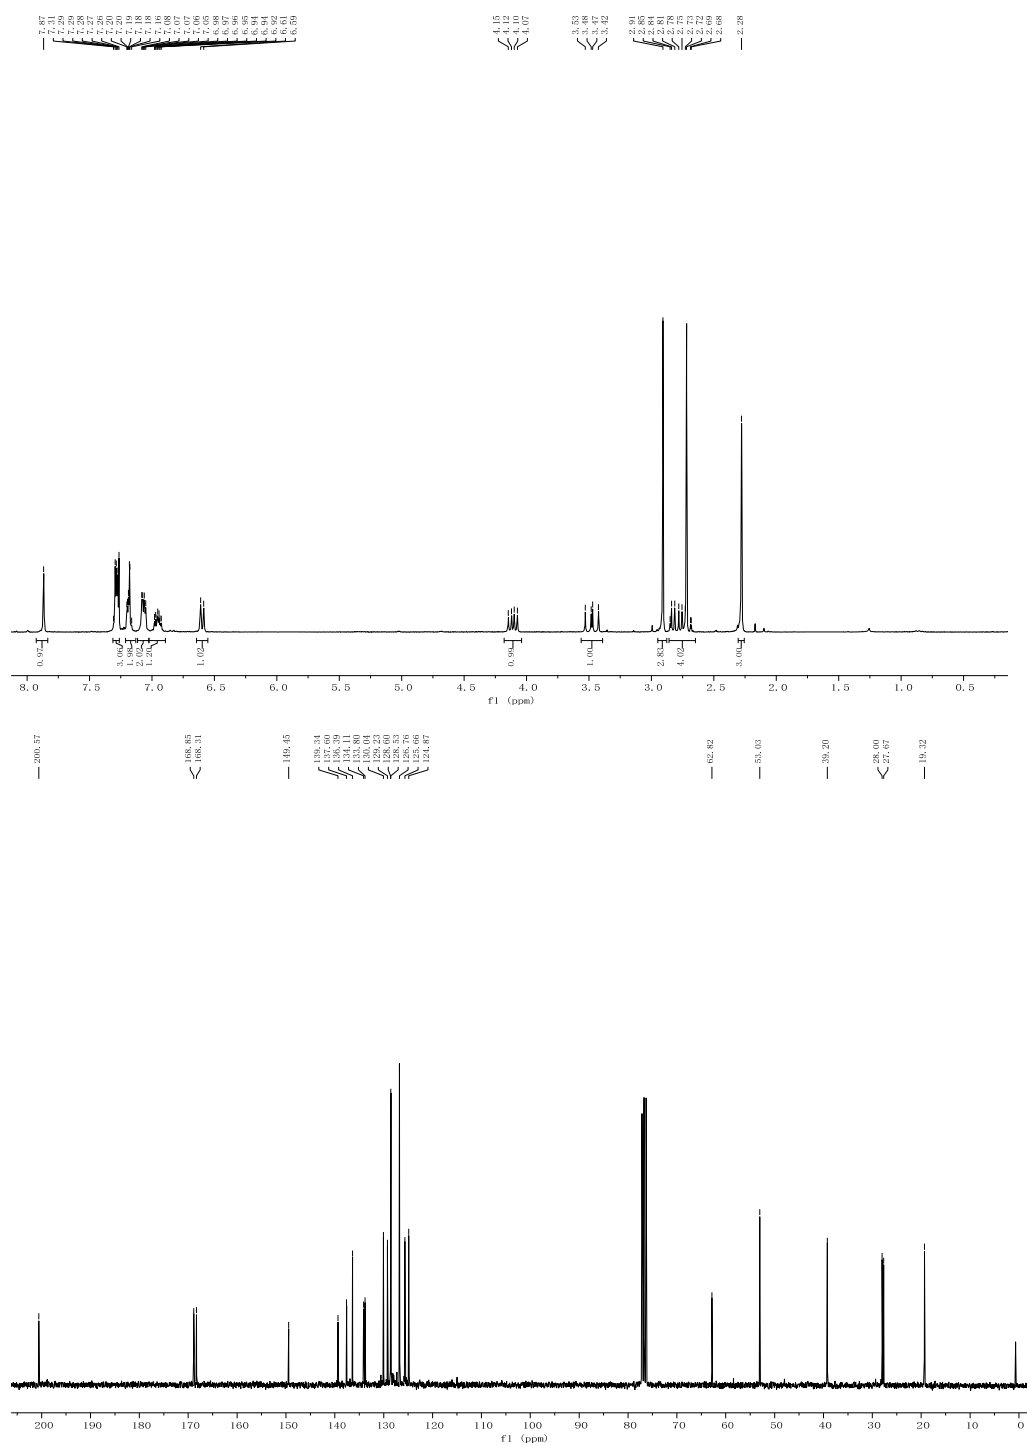



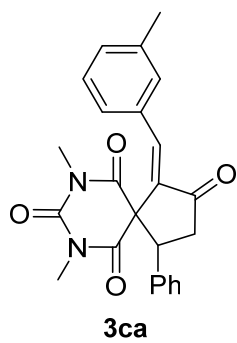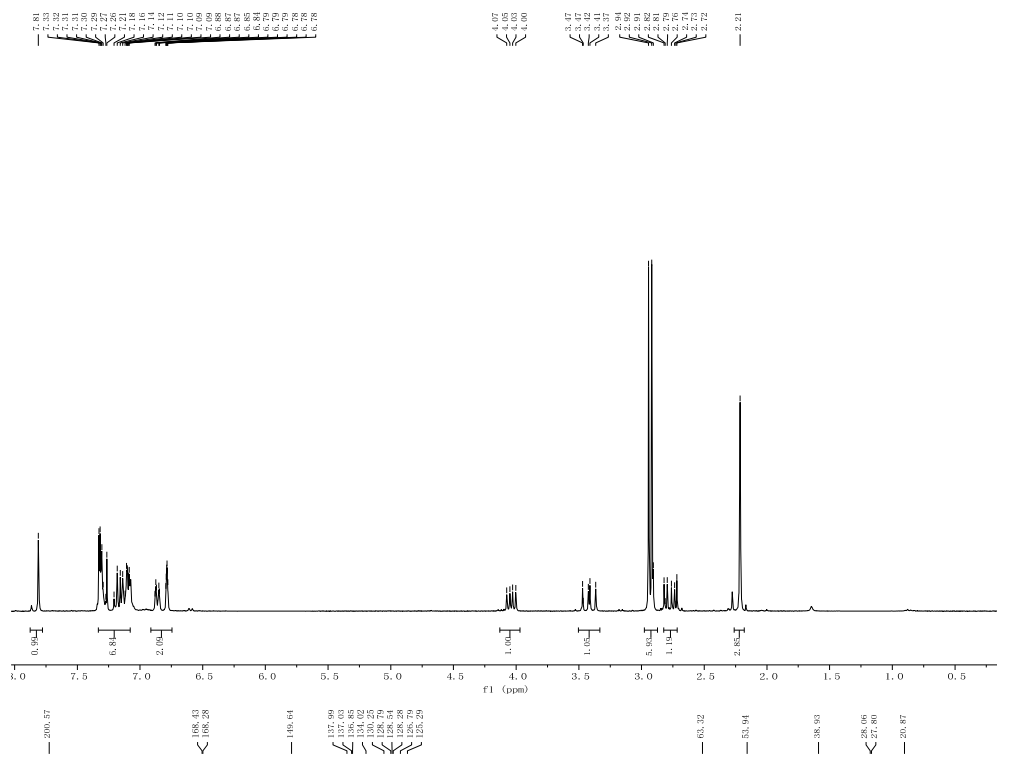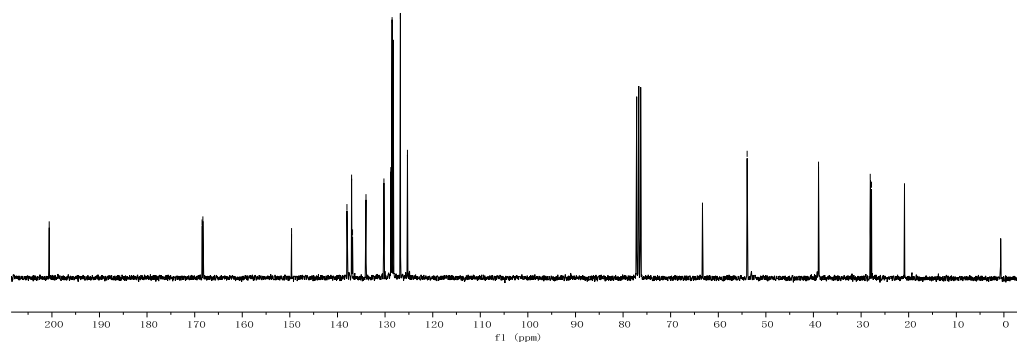

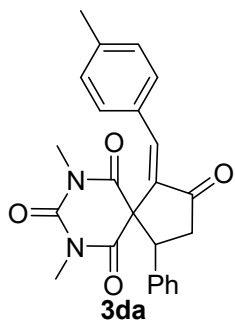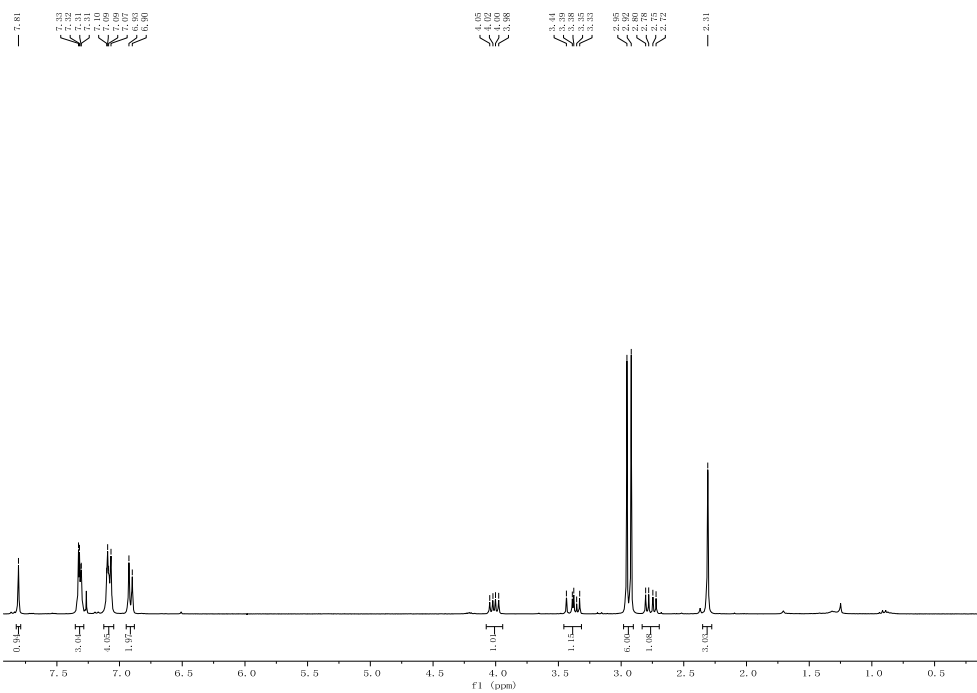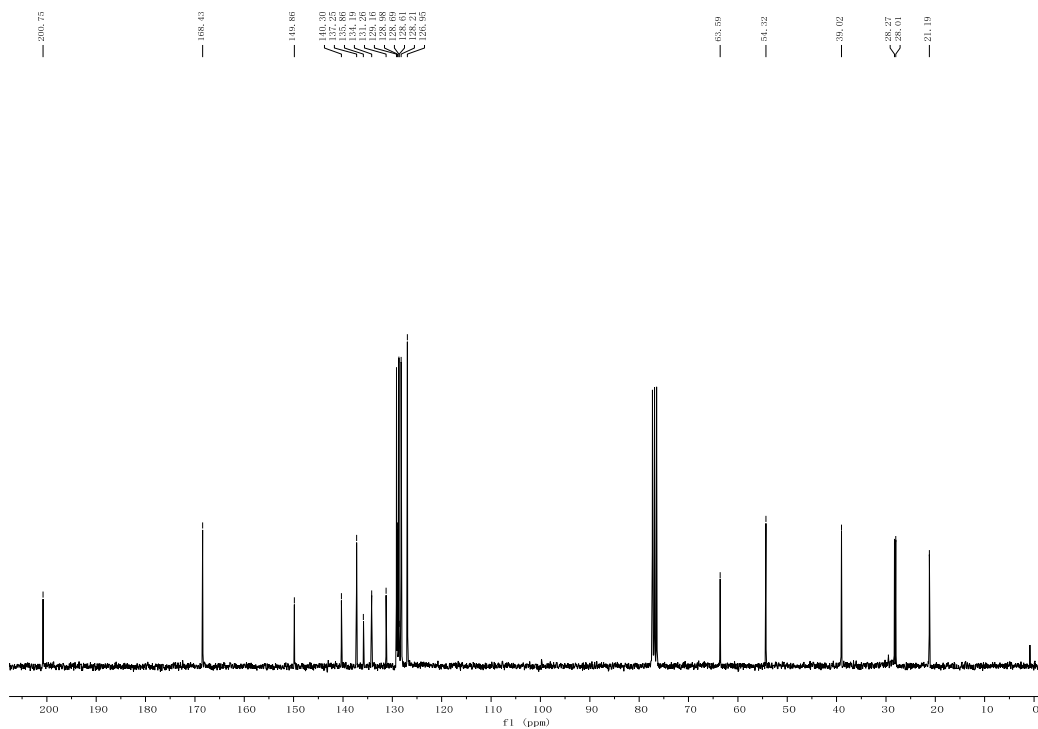

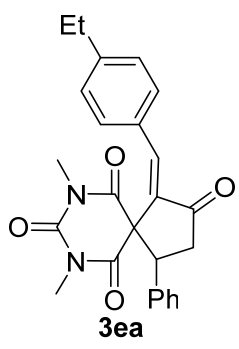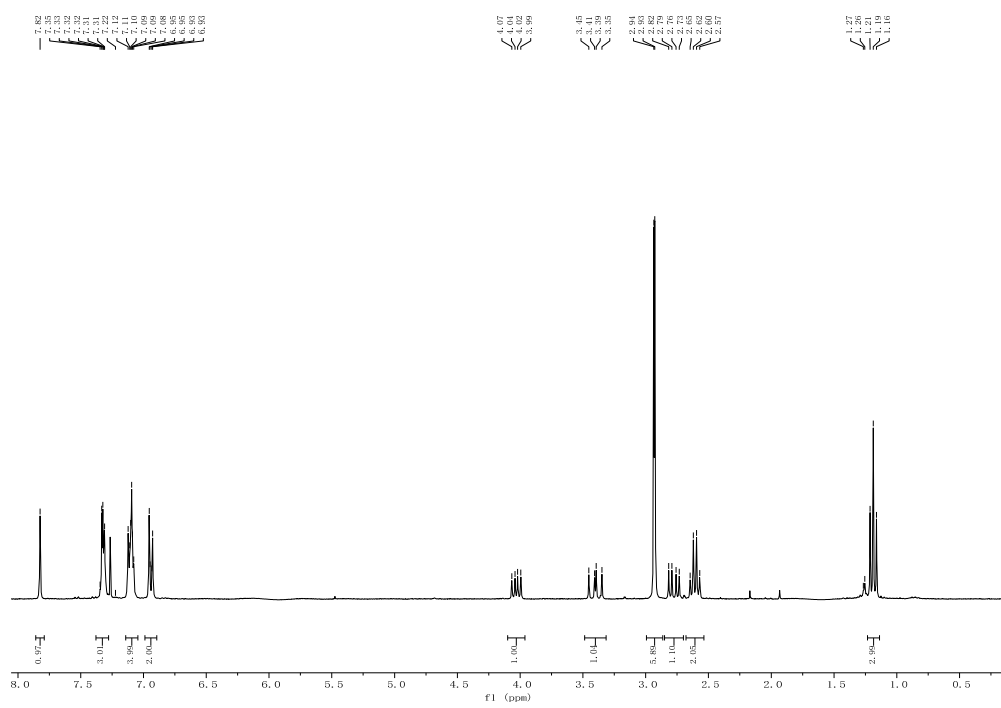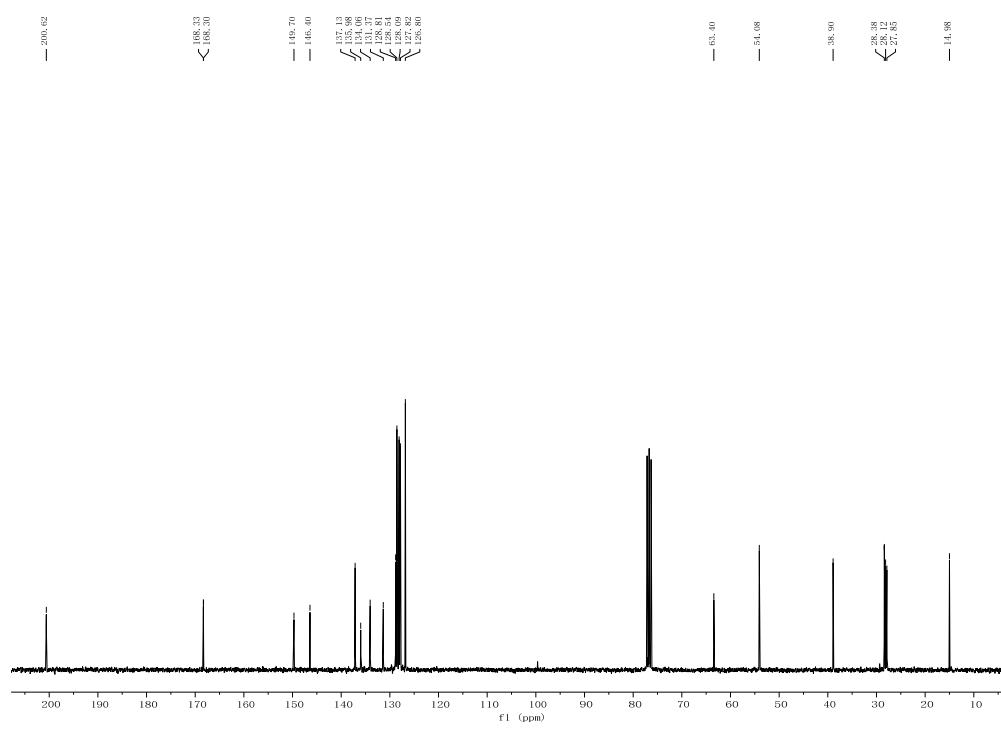

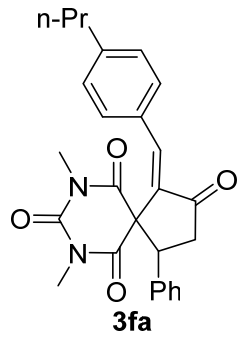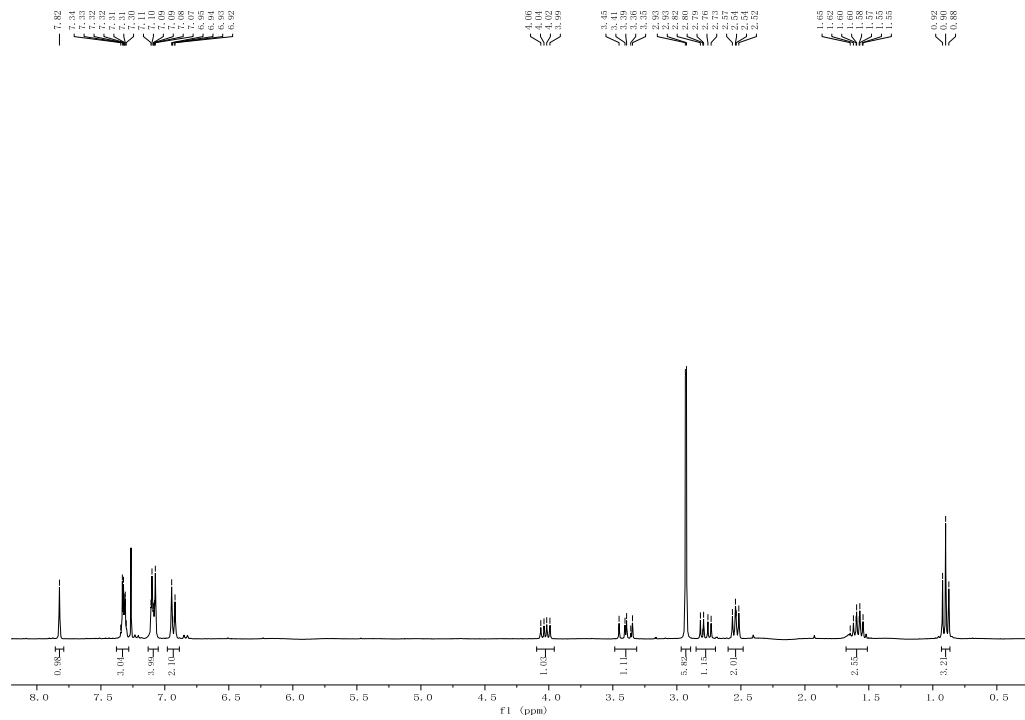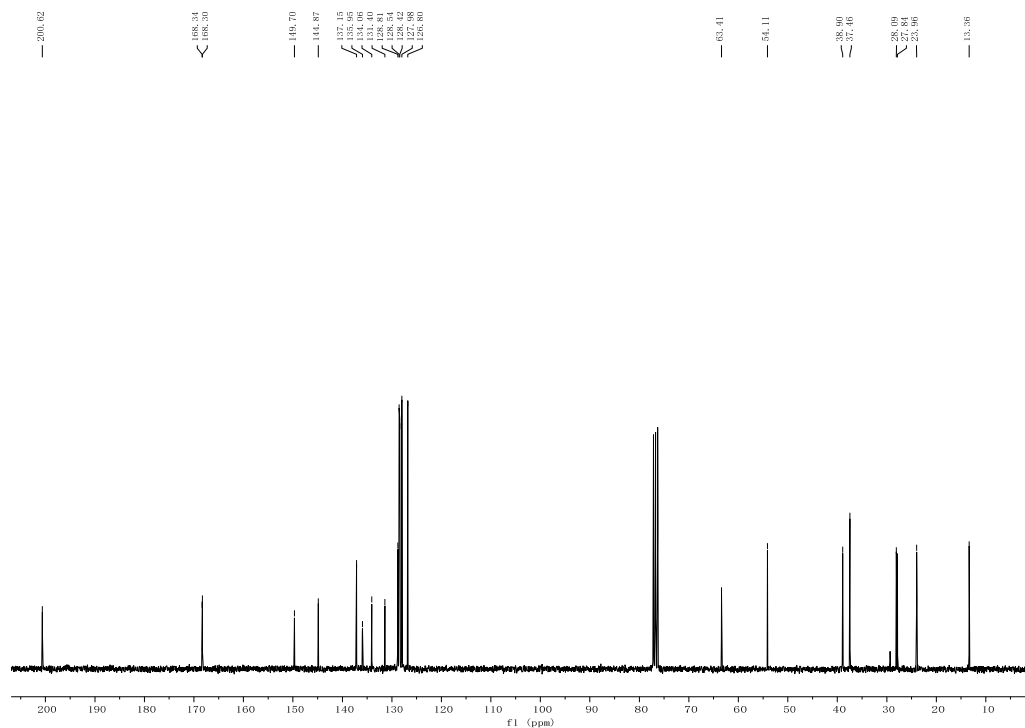

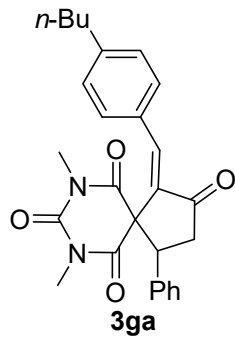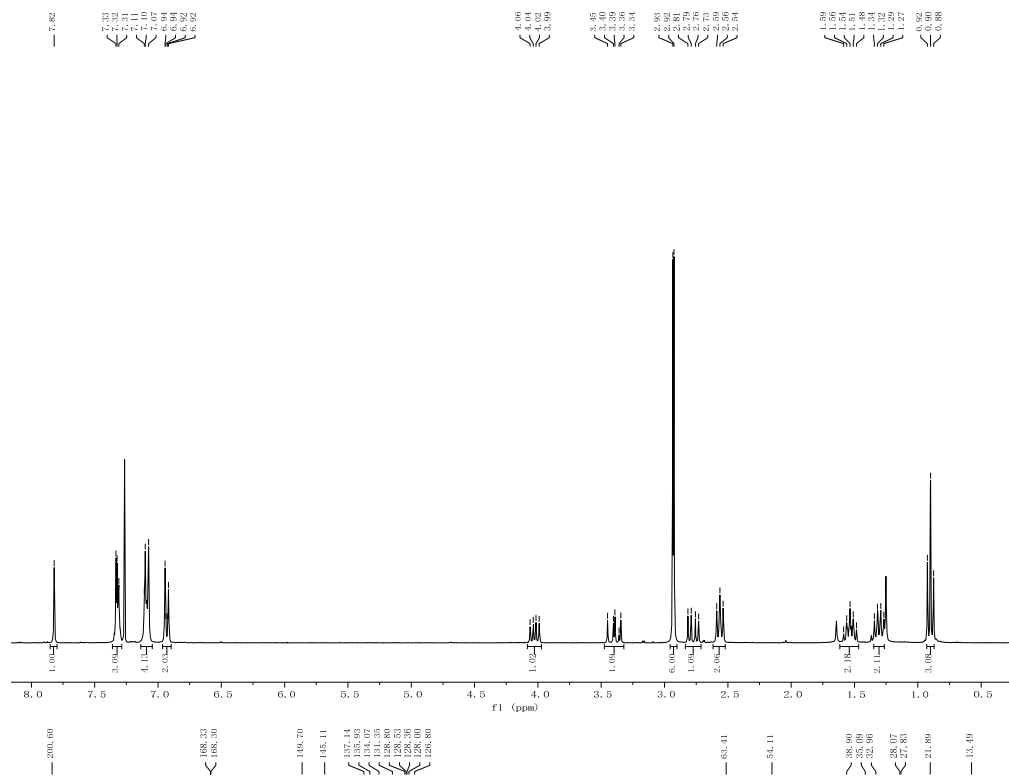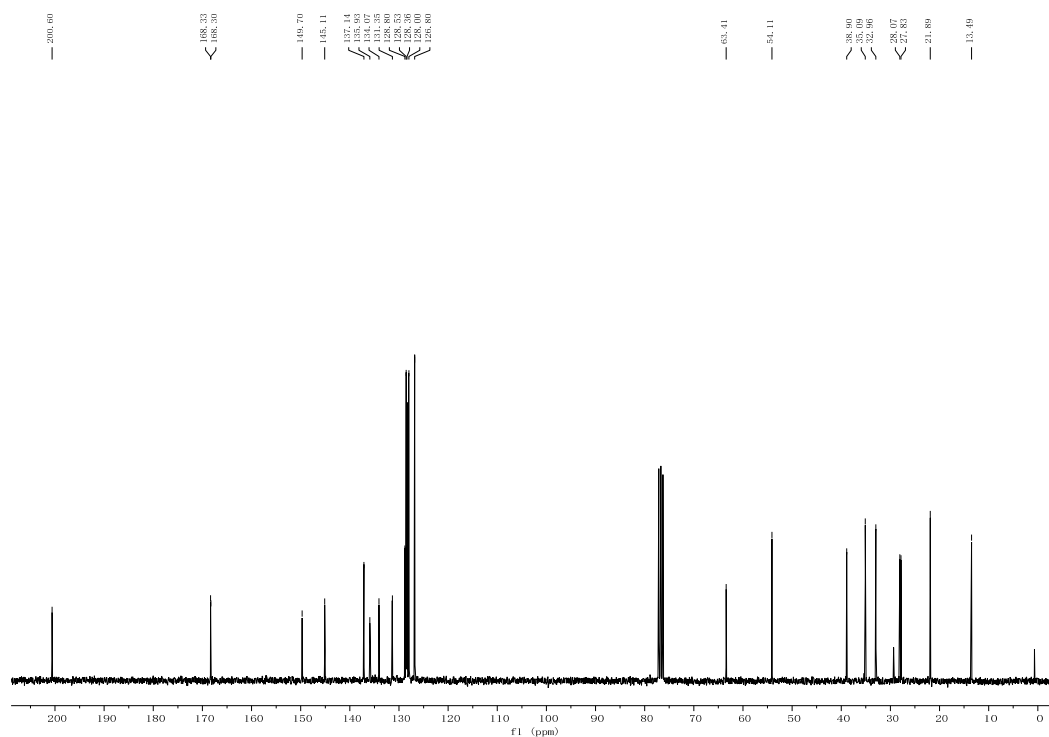

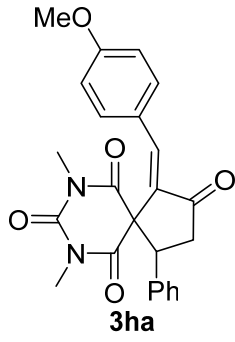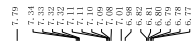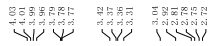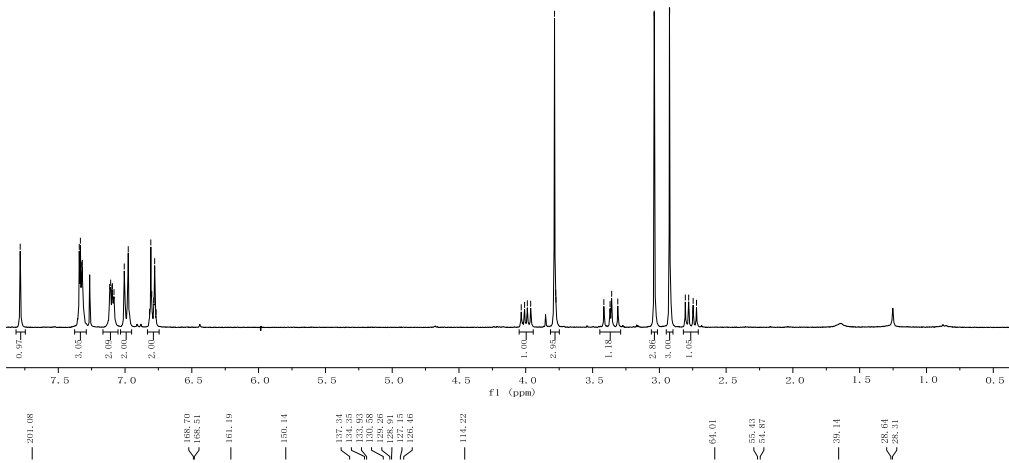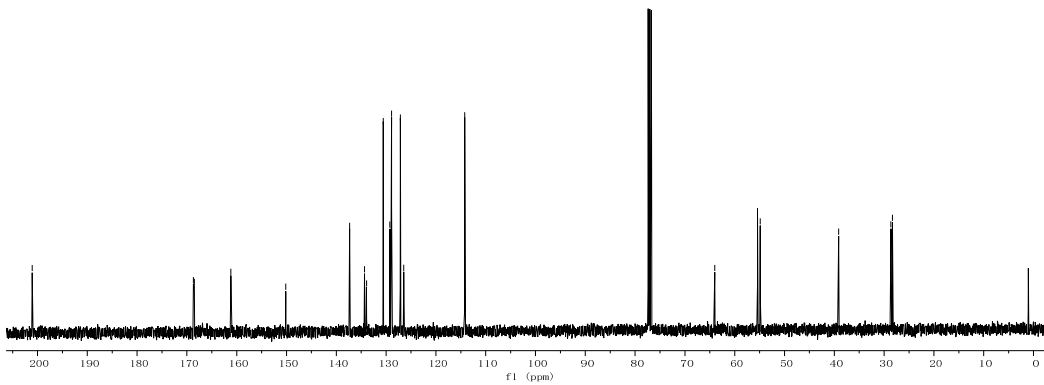

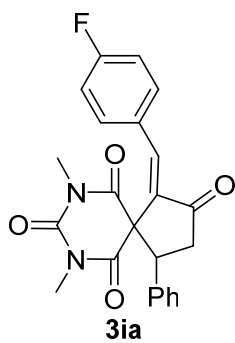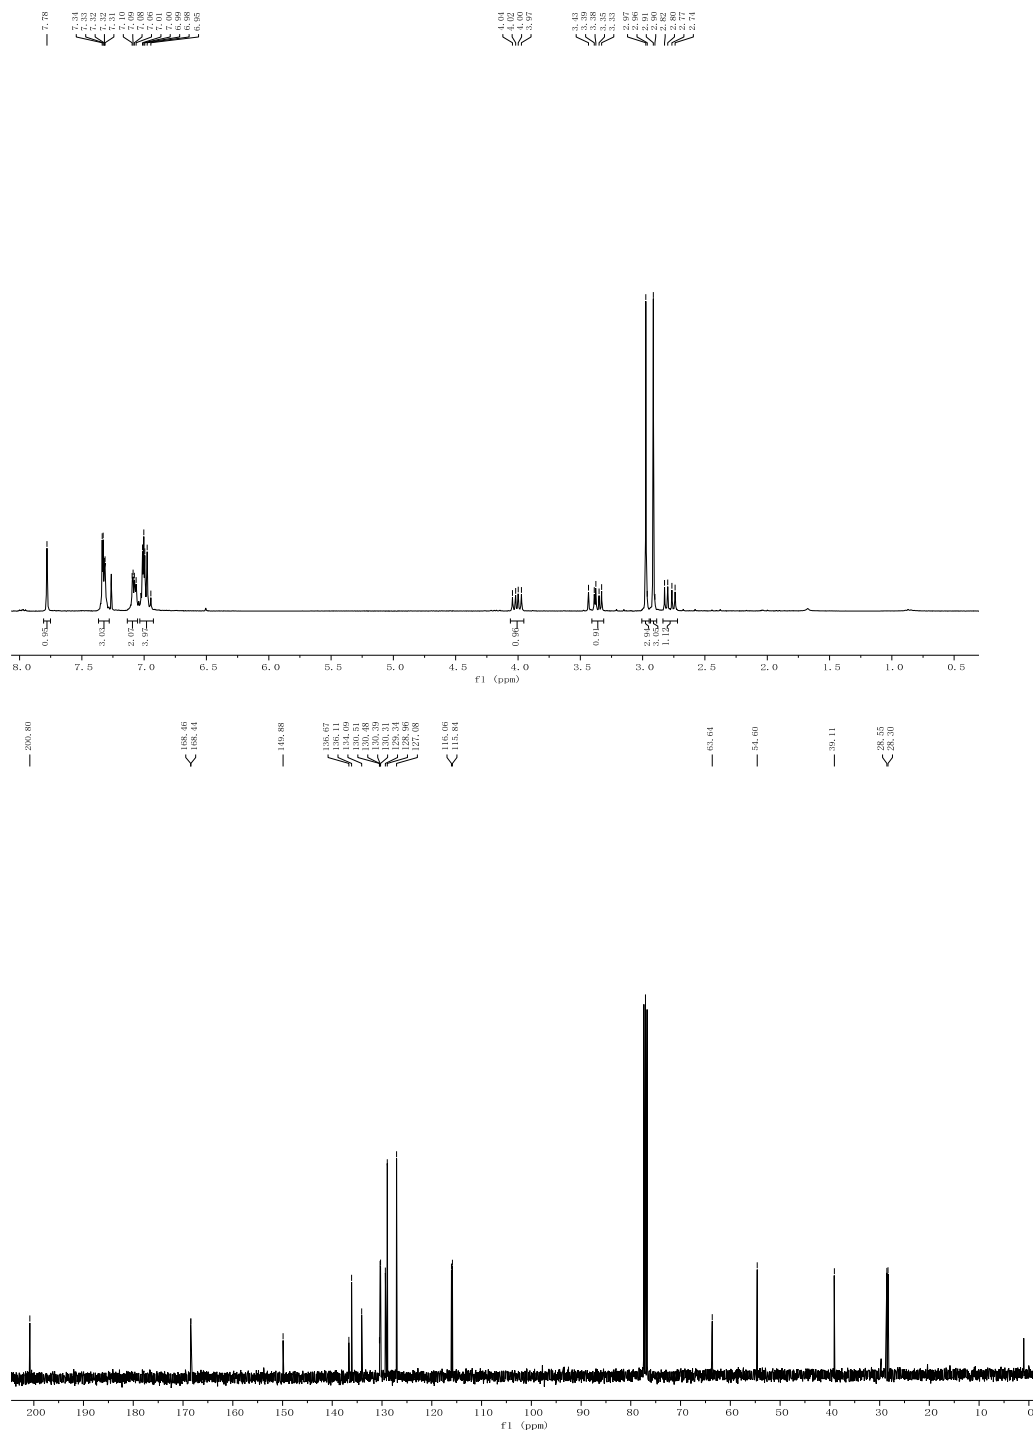

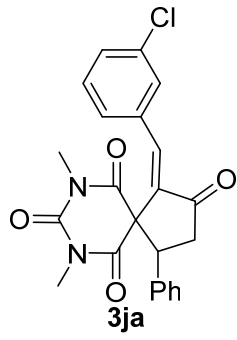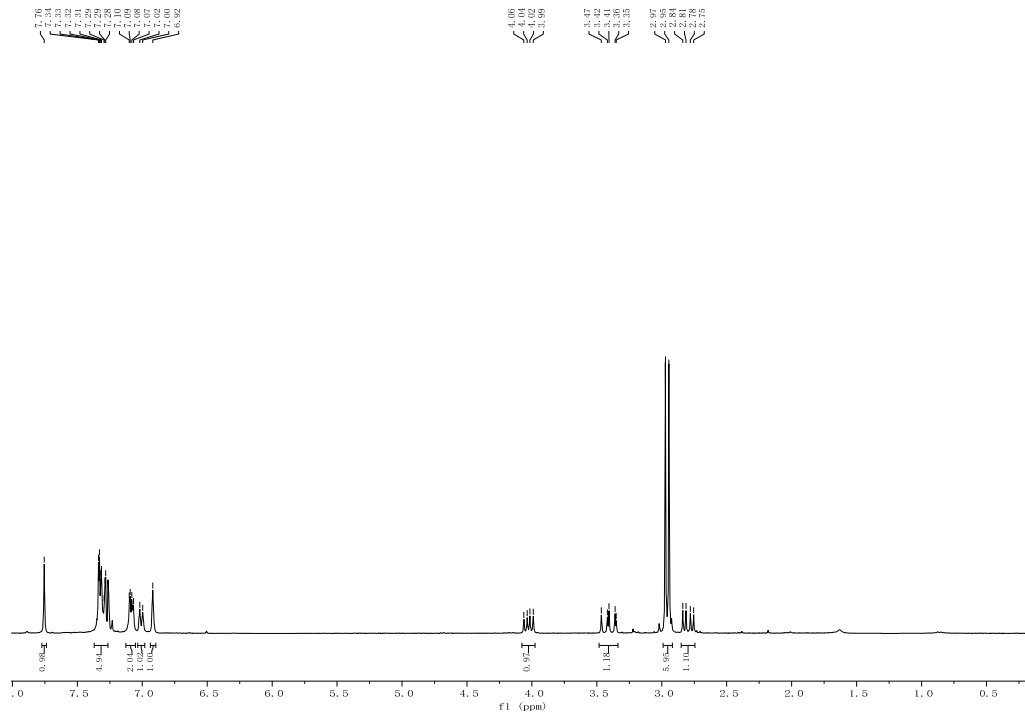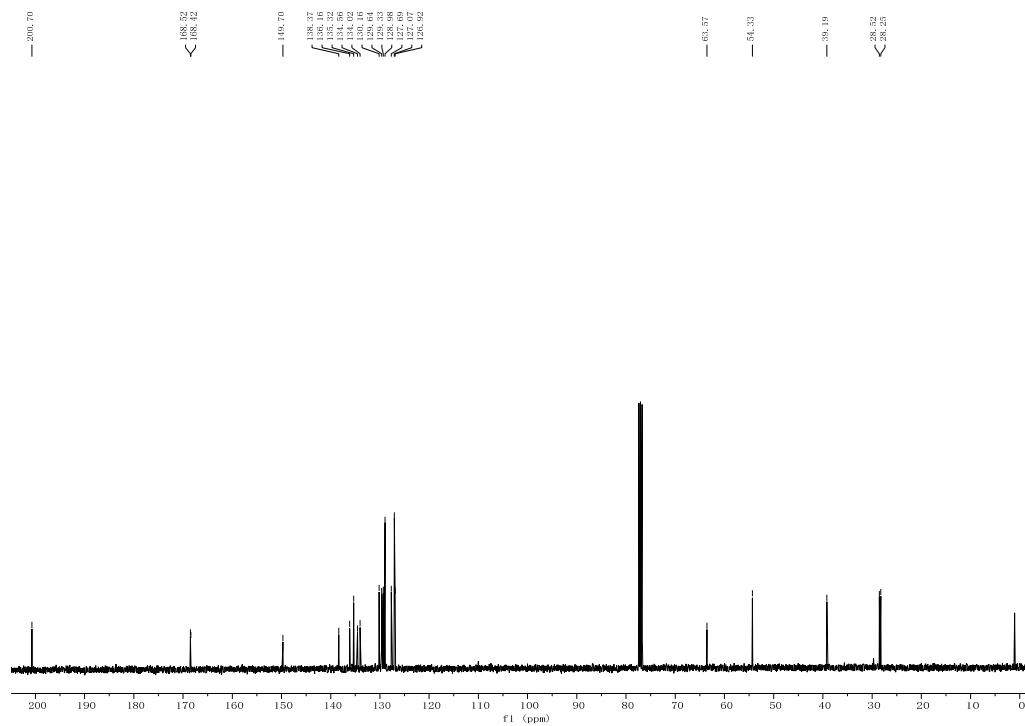



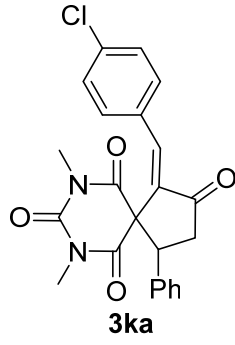

7.75  
7.53  
7.52  
7.51  
7.47  
7.24  
7.24  
7.07  
7.05  
6.96  
6.93

4.85  
4.81  
3.89  
3.86  
3.43  
3.38  
3.34  
3.32  
2.89  
2.82  
2.79  
2.73

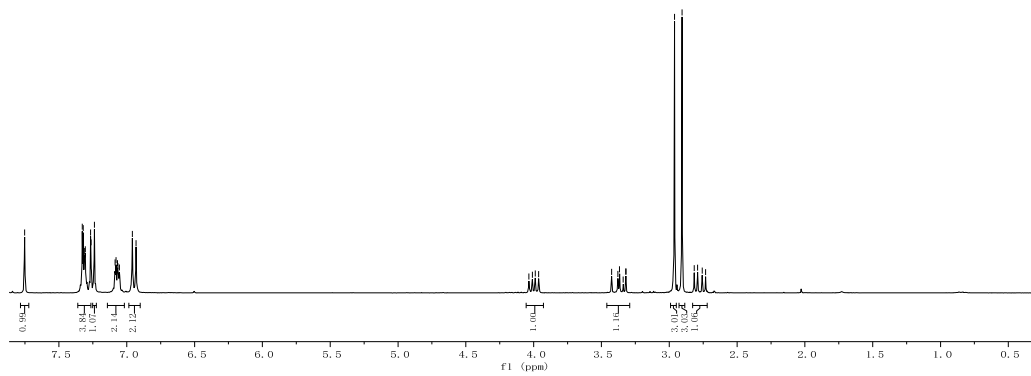

200.41  
188.22  
186.16  
149.63  
137.18  
136.51  
133.91  
129.52  
128.11  
126.90

63.42  
54.32  
38.92  
28.31  
28.06

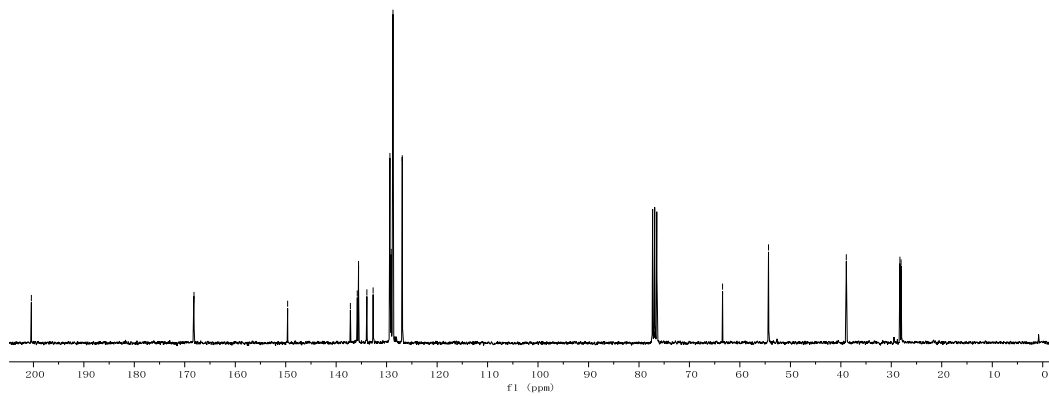

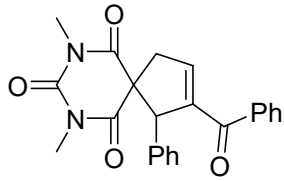

**3ma**

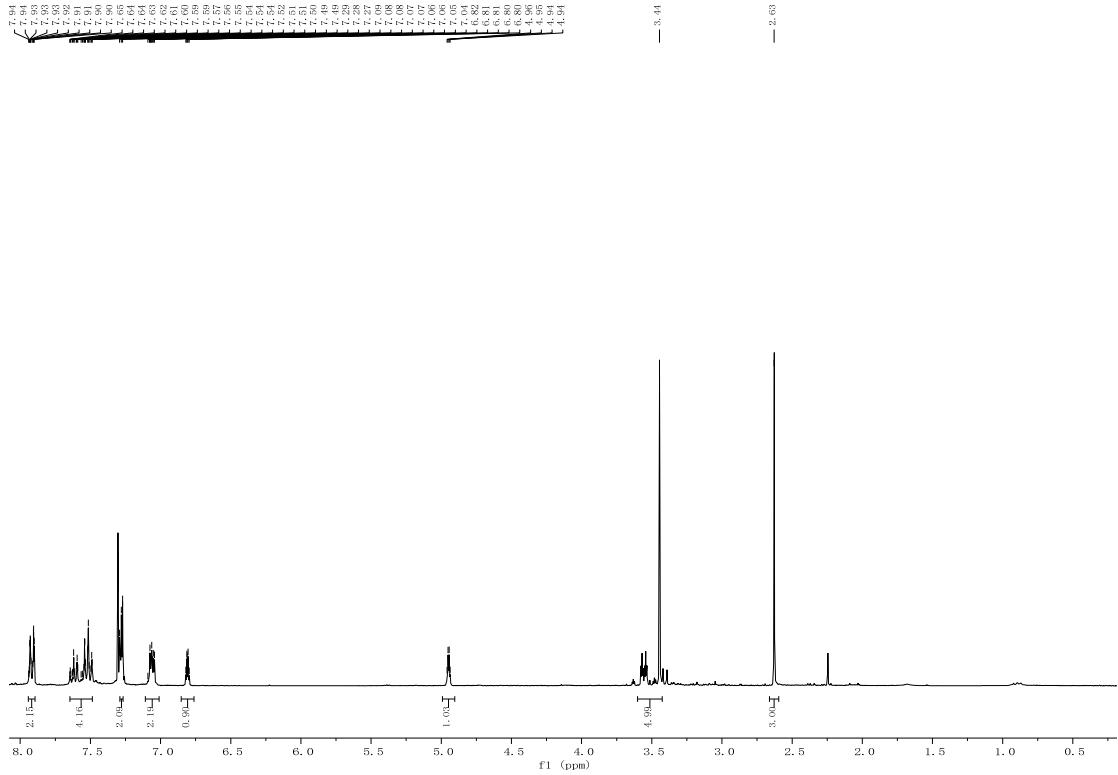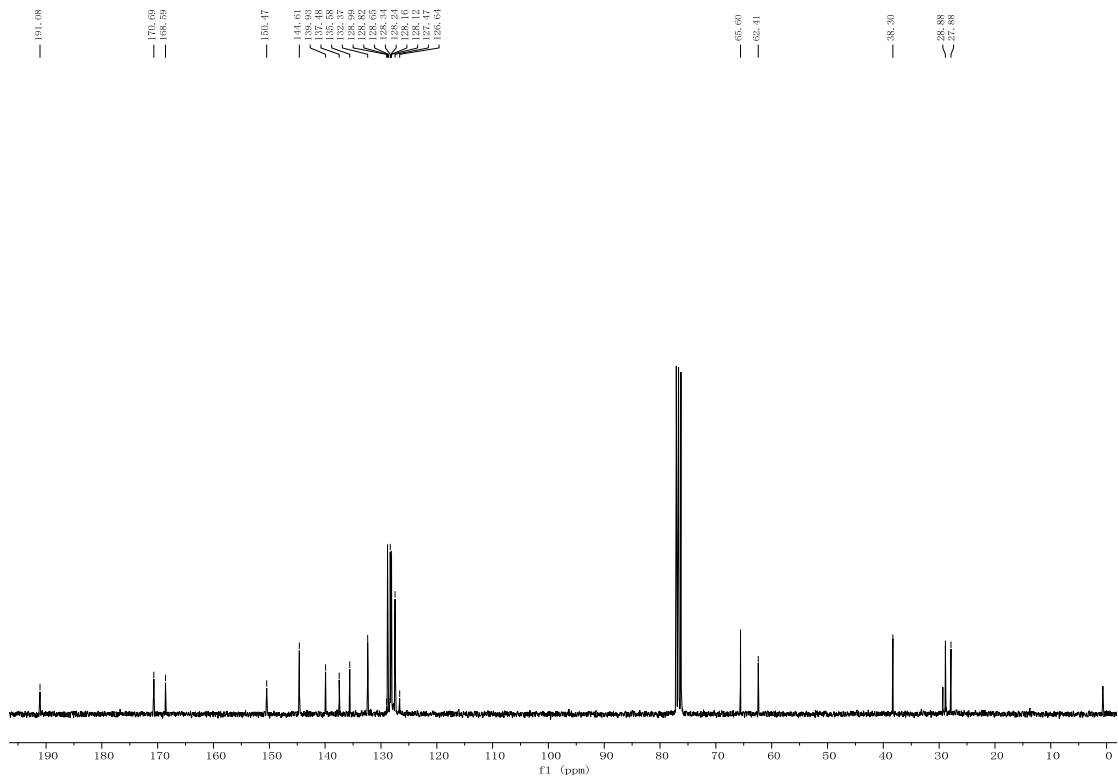

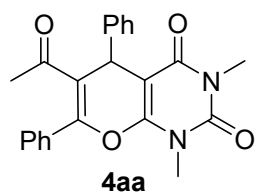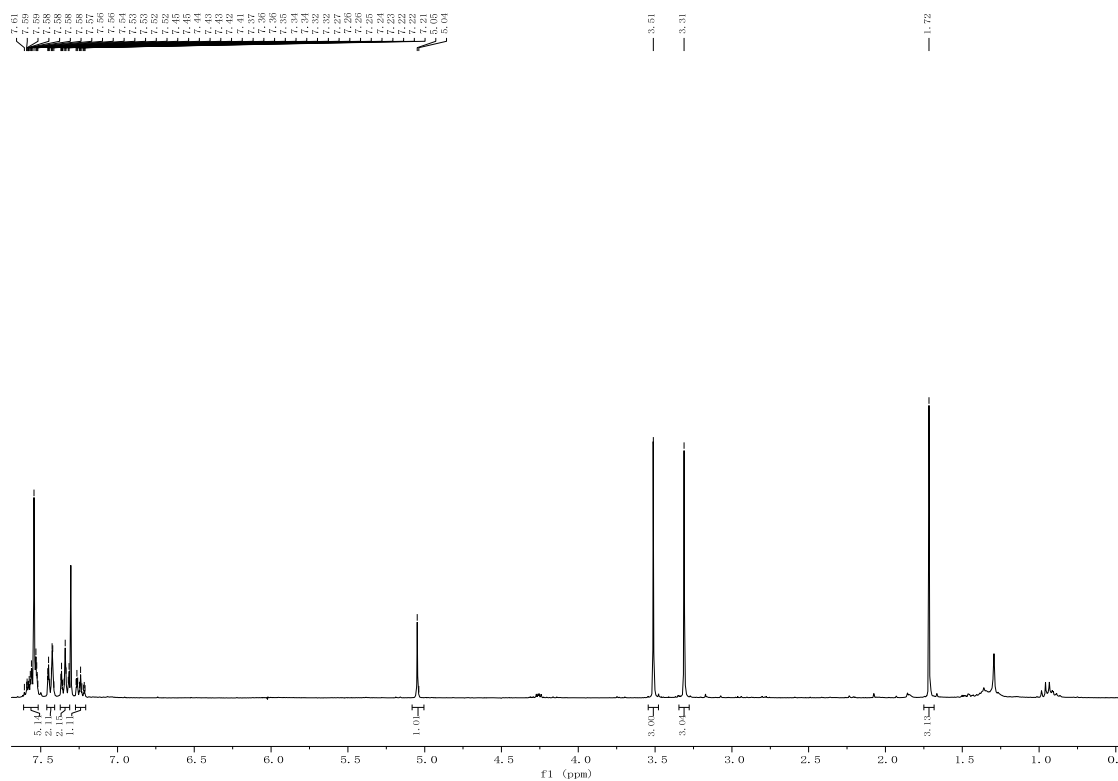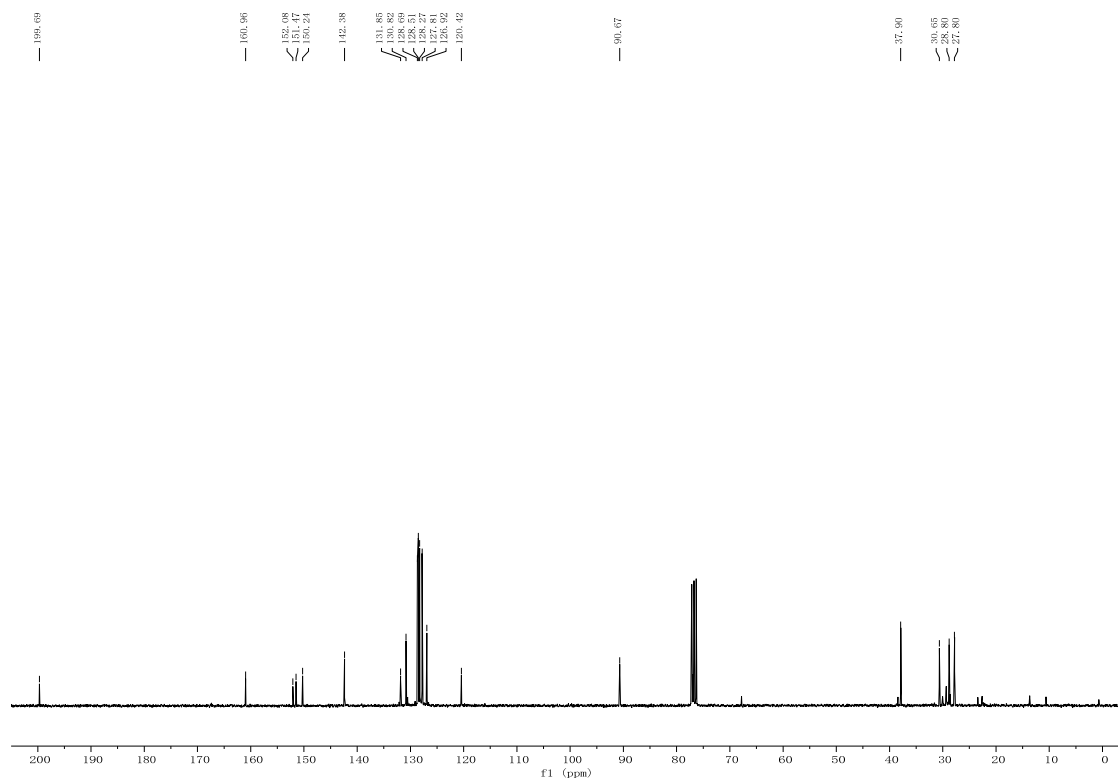

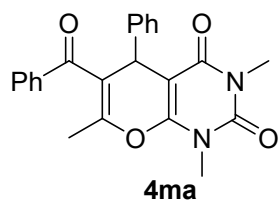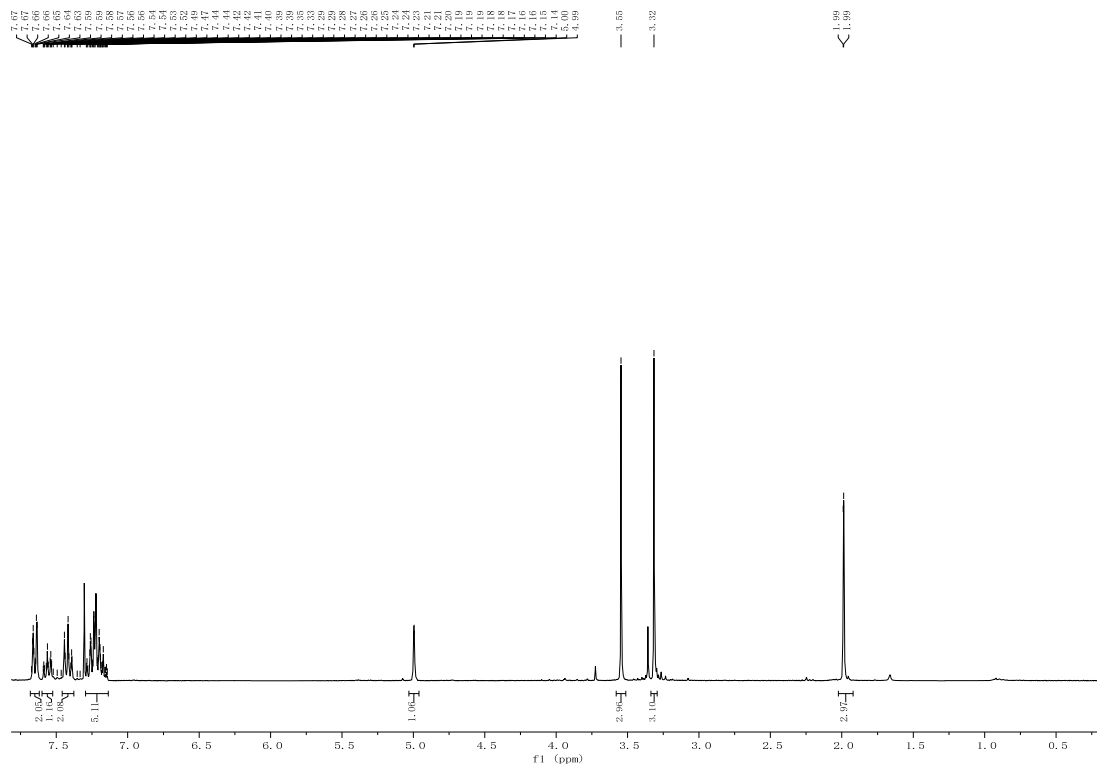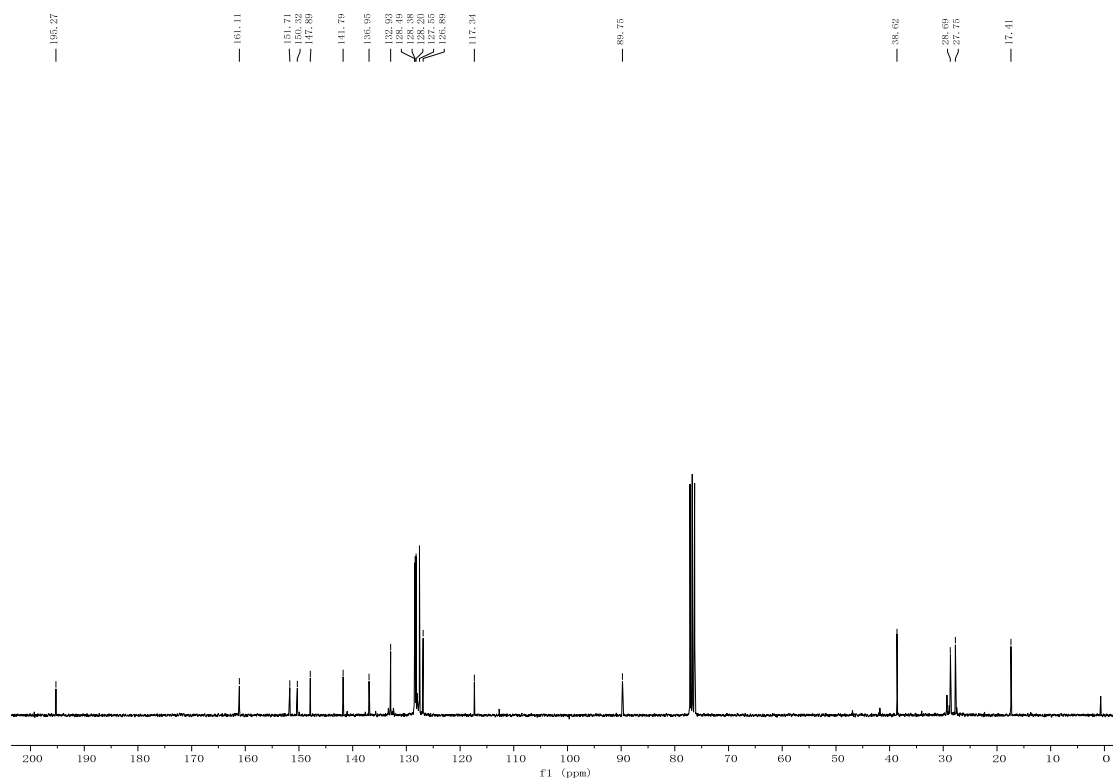

### Chiral HPLC analysis of chiral catalyst entry

#### HPLC chromatogram of racemic product 3aa

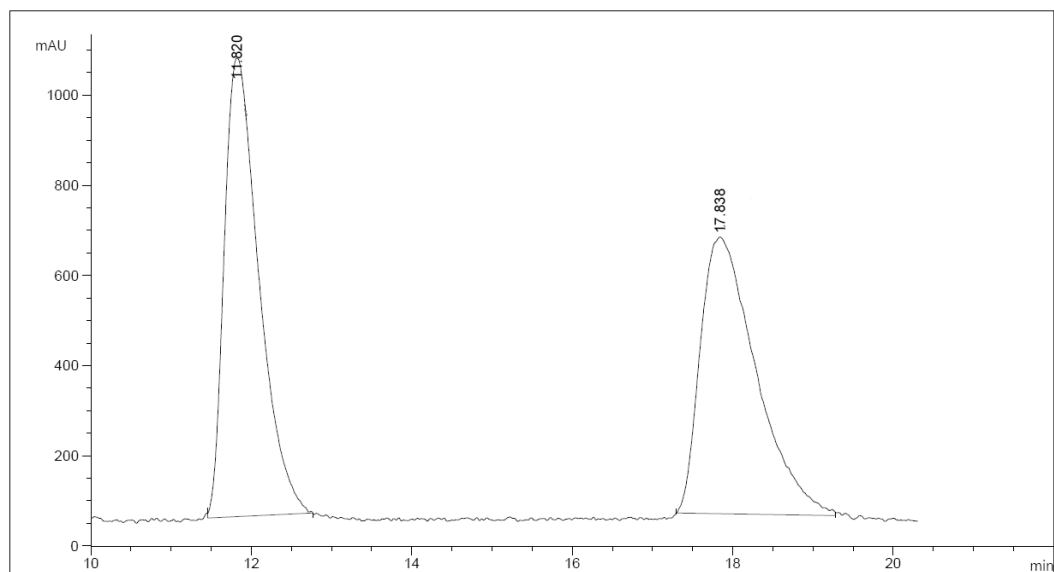

| Peak # | Ret Time [min] | Type | Width [min] | Area mAU*s | Height [mAU] | Area %  |
|--------|----------------|------|-------------|------------|--------------|---------|
| 1      | 11.820         | MM   | 0.4996      | 3.05099e4  | 1017.89349   | 50.7918 |
| 2      | 17.838         | MM   | 0.8026      | 2.95587e4  | 613.79730    | 49.2082 |

#### HPLC chromatogram of chiral product 3aa

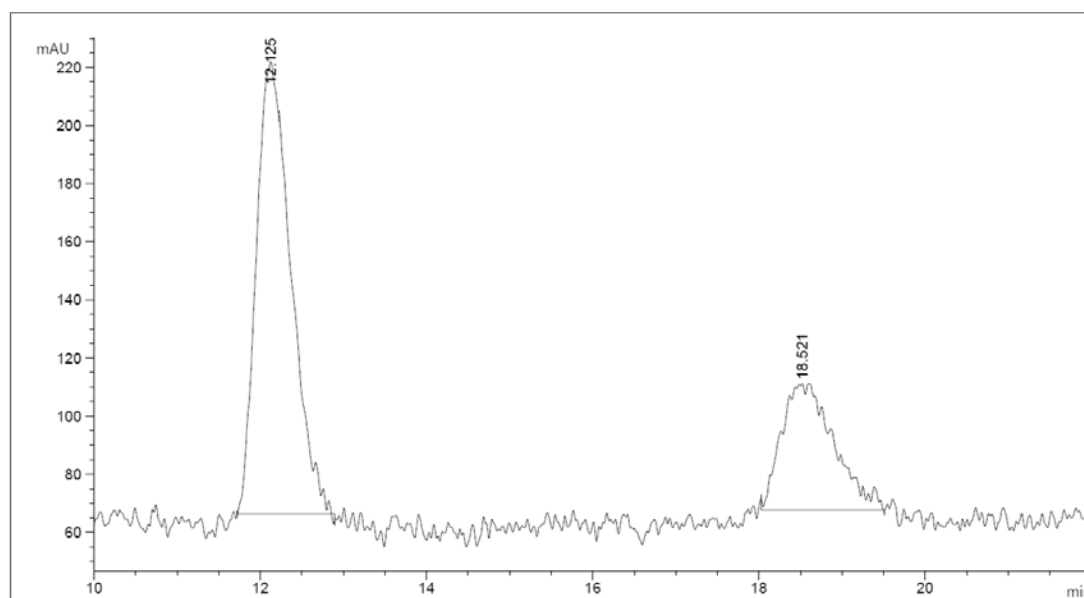

| Peak # | Ret Time [min] | Type | Width [min] | Area mAU*s | Height [mAU] | Area %  |
|--------|----------------|------|-------------|------------|--------------|---------|
| 1      | 12.125         | MM   | 0.4823      | 4496.48340 | 155.39626    | 70.2471 |
| 2      | 18.521         | MM   | 0.7304      | 1904.46936 | 43.45869     | 29.7529 |

## X-Ray Crystallographic Data

Crystallographic data for **3aa**, **3ma** and **4ma** has been deposited with the Cambridge Crystallographic Data Centre as deposition number CCDC 1474966, 1525361 and 1525356, respectively. These data can be obtained free of charge via [www.ccdc.cam.ac.uk/data\\_request/cif](http://www.ccdc.cam.ac.uk/data_request/cif), or by emailing [data\\_request@ccdc.cam.ac.uk](mailto:data_request@ccdc.cam.ac.uk), or by contacting The Cambridge Crystallographic Data Centre, 12, Union Road, Cambridge CB2 1EZ, UK; fax: +44 1223 336033.

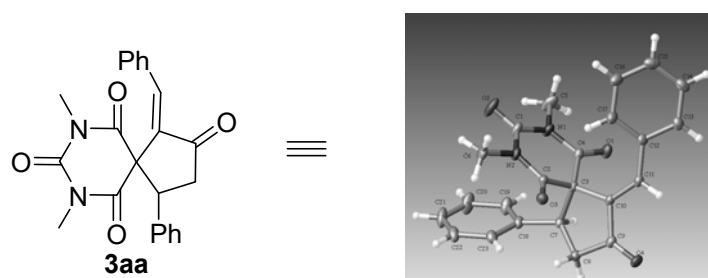

Table 1. Crystal data and structure refinement for **3aa**

|                        |                                                               |                 |
|------------------------|---------------------------------------------------------------|-----------------|
| Identification code    | <b>3aa</b>                                                    |                 |
| Empirical formula      | C <sub>23</sub> H <sub>20</sub> N <sub>2</sub> O <sub>4</sub> |                 |
| Formula weight         | 388.41                                                        |                 |
| Temperature            | 173.1500 K                                                    |                 |
| Wavelength             | 0.71073 Å                                                     |                 |
| Crystal system         | Triclinic                                                     |                 |
| Space group            | P -1                                                          |                 |
| Unit cell dimensions   | a = 8.5462(17) Å                                              | a = 90.29(3)°.  |
|                        | b = 9.7412(19) Å                                              | b = 104.04(3)°. |
|                        | c = 12.085(2) Å                                               | g = 94.61(3)°.  |
| Volume                 | 972.6(4) Å <sup>3</sup>                                       |                 |
| Z                      | 2                                                             |                 |
| Density (calculated)   | 1.326 Mg/m <sup>3</sup>                                       |                 |
| Absorption coefficient | 0.092 mm <sup>-1</sup>                                        |                 |

|                                   |                                             |
|-----------------------------------|---------------------------------------------|
| F(000)                            | 408                                         |
| Crystal size                      | 0.33 x 0.21 x 0.16 mm <sup>3</sup>          |
| Theta range for data collection   | 2.465 to 27.490°.                           |
| Index ranges                      | -11<=h<=11, -12<=k<=12, -15<=l<=14          |
| Reflections collected             | 10072                                       |
| Independent reflections           | 4384 [R(int) = 0.0319]                      |
| Completeness to theta = 26.000°   | 98.7 %                                      |
| Absorption correction             | Semi-empirical from equivalents             |
| Max. and min. transmission        | 1.0000 and 0.7894                           |
| Refinement method                 | Full-matrix least-squares on F <sup>2</sup> |
| Data / restraints / parameters    | 4384 / 0 / 264                              |
| Goodness-of-fit on F <sup>2</sup> | 1.152                                       |
| Final R indices [I>2sigma(I)]     | R1 = 0.0644, wR2 = 0.1352                   |
| R indices (all data)              | R1 = 0.0734, wR2 = 0.1425                   |
| Extinction coefficient            | n/a                                         |
| Largest diff. peak and hole       | 0.270 and -0.253 e.Å <sup>-3</sup>          |

Table 2. Atomic coordinates (x 10<sup>4</sup>) and equivalent isotropic displacement parameters (Å<sup>2</sup> x 10<sup>3</sup>) for **3aa**. U(eq) is defined as one third of the trace of the orthogonalized U<sup>ij</sup> tensor.

|    | x       | y        | z       | U(eq) |
|----|---------|----------|---------|-------|
| O1 | 5089(2) | 747(2)   | 3620(1) | 37(1) |
| O2 | 5770(2) | -1442(2) | 486(1)  | 60(1) |
| O3 | 1544(2) | -3006(1) | 1913(1) | 32(1) |
| O4 | 1019(2) | -1828(2) | 5124(1) | 39(1) |
| N1 | 5489(2) | -376(2)  | 2087(1) | 33(1) |
| N2 | 3679(2) | -2262(2) | 1210(1) | 30(1) |
| C1 | 5035(2) | -1373(2) | 1218(2) | 36(1) |
| C2 | 2787(2) | -2263(2) | 2020(2) | 25(1) |

|     |         |          |         |       |
|-----|---------|----------|---------|-------|
| C3  | 3495(2) | -1387(2) | 3086(2) | 24(1) |
| C4  | 4716(2) | -222(2)  | 2951(2) | 28(1) |
| C5  | 6884(3) | 598(3)   | 2062(2) | 54(1) |
| C6  | 3210(3) | -3322(2) | 289(2)  | 41(1) |
| C7  | 4452(2) | -2384(2) | 4036(2) | 28(1) |
| C8  | 3137(2) | -3001(2) | 4592(2) | 32(1) |
| C9  | 1986(2) | -1902(2) | 4541(2) | 30(1) |
| C10 | 2194(2) | -925(2)  | 3631(2) | 26(1) |
| C11 | 1325(2) | 165(2)   | 3425(2) | 29(1) |
| C12 | 1266(2) | 1197(2)  | 2536(2) | 30(1) |
| C13 | 952(2)  | 2537(2)  | 2765(2) | 36(1) |
| C14 | 879(3)  | 3529(2)  | 1939(2) | 43(1) |
| C15 | 1074(3) | 3189(3)  | 871(2)  | 47(1) |
| C16 | 1338(3) | 1860(3)  | 617(2)  | 48(1) |
| C17 | 1439(3) | 868(2)   | 1448(2) | 42(1) |
| C18 | 5435(2) | -3374(2) | 3580(2) | 31(1) |
| C19 | 7048(3) | -2994(3) | 3606(2) | 46(1) |
| C20 | 7935(3) | -3849(3) | 3115(2) | 64(1) |
| C21 | 7223(3) | -5088(3) | 2607(2) | 59(1) |
| C22 | 5646(3) | -5486(2) | 2590(2) | 45(1) |
| C23 | 4756(3) | -4637(2) | 3079(2) | 36(1) |

---

Table 3. Bond lengths [Å] and angles [°] for **3aa**.

---

|       |          |
|-------|----------|
| O1-C4 | 1.209(2) |
| O2-C1 | 1.208(2) |
| O3-C2 | 1.215(2) |
| O4-C9 | 1.215(2) |
| N1-C1 | 1.388(3) |



|         |          |
|---------|----------|
| N1-C4   | 1.378(2) |
| N1-C5   | 1.469(3) |
| N2-C1   | 1.388(3) |
| N2-C2   | 1.379(2) |
| N2-C6   | 1.473(2) |
| C2-C3   | 1.510(2) |
| C3-C4   | 1.516(3) |
| C3-C7   | 1.617(3) |
| C3-C10  | 1.519(2) |
| C5-H5A  | 0.9600   |
| C5-H5B  | 0.9600   |
| C5-H5C  | 0.9600   |
| C6-H6A  | 0.9600   |
| C6-H6B  | 0.9600   |
| C6-H6C  | 0.9600   |
| C7-H7   | 0.9800   |
| C7-C8   | 1.529(3) |
| C7-C18  | 1.513(3) |
| C8-H8A  | 0.9700   |
| C8-H8B  | 0.9700   |
| C8-C9   | 1.503(3) |
| C9-C10  | 1.491(3) |
| C10-C11 | 1.334(3) |
| C11-H11 | 0.9300   |
| C11-C12 | 1.469(3) |
| C12-C13 | 1.393(3) |
| C12-C17 | 1.397(3) |
| C13-H13 | 0.9300   |
| C13-C14 | 1.387(3) |
| C14-H14 | 0.9300   |

|          |            |
|----------|------------|
| C14-C15  | 1.383(4)   |
| C15-H15  | 0.9300     |
| C15-C16  | 1.377(4)   |
| C16-H16  | 0.9300     |
| C16-C17  | 1.390(3)   |
| C17-H17  | 0.9300     |
| C18-C19  | 1.390(3)   |
| C18-C23  | 1.388(3)   |
| C19-H19  | 0.9300     |
| C19-C20  | 1.392(3)   |
| C20-H20  | 0.9300     |
| C20-C21  | 1.377(4)   |
| C21-H21  | 0.9300     |
| C21-C22  | 1.368(4)   |
| C22-H22  | 0.9300     |
| C22-C23  | 1.387(3)   |
| C23-H23  | 0.9300     |
|          |            |
| C1-N1-C5 | 116.95(17) |
| C4-N1-C1 | 125.01(16) |
| C4-N1-C5 | 118.04(17) |
| C1-N2-C6 | 116.95(16) |
| C2-N2-C1 | 125.03(16) |
| C2-N2-C6 | 117.95(16) |
| O2-C1-N1 | 121.25(19) |
| O2-C1-N2 | 121.44(19) |
| N2-C1-N1 | 117.29(16) |
| O3-C2-N2 | 121.31(16) |
| O3-C2-C3 | 121.63(16) |
| N2-C2-C3 | 116.89(15) |

|            |            |
|------------|------------|
| C2-C3-C4   | 114.68(15) |
| C2-C3-C7   | 106.99(14) |
| C2-C3-C10  | 112.01(14) |
| C4-C3-C7   | 106.46(14) |
| C4-C3-C10  | 113.19(15) |
| C10-C3-C7  | 102.38(14) |
| O1-C4-N1   | 121.25(17) |
| O1-C4-C3   | 121.89(17) |
| N1-C4-C3   | 116.63(16) |
| N1-C5-H5A  | 109.5      |
| N1-C5-H5B  | 109.5      |
| N1-C5-H5C  | 109.5      |
| H5A-C5-H5B | 109.5      |
| H5A-C5-H5C | 109.5      |
| H5B-C5-H5C | 109.5      |
| N2-C6-H6A  | 109.5      |
| N2-C6-H6B  | 109.5      |
| N2-C6-H6C  | 109.5      |
| H6A-C6-H6B | 109.5      |
| H6A-C6-H6C | 109.5      |
| H6B-C6-H6C | 109.5      |
| C3-C7-H7   | 107.1      |
| C8-C7-C3   | 103.46(14) |
| C8-C7-H7   | 107.1      |
| C18-C7-C3  | 114.05(15) |
| C18-C7-H7  | 107.1      |
| C18-C7-C8  | 117.47(16) |
| C7-C8-H8A  | 110.7      |
| C7-C8-H8B  | 110.7      |
| H8A-C8-H8B | 108.8      |

|             |            |
|-------------|------------|
| C9-C8-C7    | 105.35(15) |
| C9-C8-H8A   | 110.7      |
| C9-C8-H8B   | 110.7      |
| O4-C9-C8    | 126.04(18) |
| O4-C9-C10   | 125.21(18) |
| C10-C9-C8   | 108.73(15) |
| C9-C10-C3   | 109.08(15) |
| C11-C10-C3  | 130.27(17) |
| C11-C10-C9  | 120.64(17) |
| C10-C11-H11 | 115.3      |
| C10-C11-C12 | 129.50(17) |
| C12-C11-H11 | 115.3      |
| C13-C12-C11 | 119.06(18) |
| C13-C12-C17 | 118.56(19) |
| C17-C12-C11 | 122.32(18) |
| C12-C13-H13 | 119.9      |
| C14-C13-C12 | 120.3(2)   |
| C14-C13-H13 | 119.9      |
| C13-C14-H14 | 119.9      |
| C15-C14-C13 | 120.3(2)   |
| C15-C14-H14 | 119.9      |
| C14-C15-H15 | 119.9      |
| C16-C15-C14 | 120.3(2)   |
| C16-C15-H15 | 119.9      |
| C15-C16-H16 | 120.2      |
| C15-C16-C17 | 119.6(2)   |
| C17-C16-H16 | 120.2      |
| C12-C17-H17 | 119.5      |
| C16-C17-C12 | 120.9(2)   |
| C16-C17-H17 | 119.5      |

|             |            |
|-------------|------------|
| C19-C18-C7  | 119.77(19) |
| C23-C18-C7  | 121.90(18) |
| C23-C18-C19 | 118.25(19) |
| C18-C19-H19 | 119.8      |
| C18-C19-C20 | 120.5(2)   |
| C20-C19-H19 | 119.8      |
| C19-C20-H20 | 120.0      |
| C21-C20-C19 | 120.1(2)   |
| C21-C20-H20 | 120.0      |
| C20-C21-H21 | 119.9      |
| C22-C21-C20 | 120.1(2)   |
| C22-C21-H21 | 119.9      |
| C21-C22-H22 | 120.0      |
| C21-C22-C23 | 120.0(2)   |
| C23-C22-H22 | 120.0      |
| C18-C23-H23 | 119.5      |
| C22-C23-C18 | 121.0(2)   |
| C22-C23-H23 | 119.5      |

---

Symmetry transformations used to generate equivalent atoms:

Table 4. Anisotropic displacement parameters ( $\text{\AA}^2 \times 10^3$ ) for **3aa**. The anisotropic displacement factor exponent takes the form:  $-2 \pi^2 [h^2 a^{*2} U^{11} + \dots + 2 h k a^* b^* U^{12}]$

|    | U <sup>11</sup> | U <sup>22</sup> | U <sup>33</sup> | U <sup>23</sup> | U <sup>13</sup> | U <sup>12</sup> |
|----|-----------------|-----------------|-----------------|-----------------|-----------------|-----------------|
| O1 | 40(1)           | 37(1)           | 35(1)           | -13(1)          | 14(1)           | -6(1)           |
| O2 | 50(1)           | 92(1)           | 44(1)           | -26(1)          | 30(1)           | -15(1)          |
| O3 | 29(1)           | 31(1)           | 35(1)           | -2(1)           | 7(1)            | -1(1)           |
| O4 | 38(1)           | 48(1)           | 39(1)           | 4(1)            | 24(1)           | 7(1)            |
| N1 | 29(1)           | 44(1)           | 29(1)           | -6(1)           | 14(1)           | -7(1)           |
| N2 | 30(1)           | 36(1)           | 24(1)           | -7(1)           | 8(1)            | 2(1)            |
| C1 | 31(1)           | 51(1)           | 29(1)           | -9(1)           | 14(1)           | 0(1)            |
| C2 | 25(1)           | 26(1)           | 24(1)           | 0(1)            | 6(1)            | 6(1)            |

|     |       |       |       |        |       |        |
|-----|-------|-------|-------|--------|-------|--------|
| C3  | 24(1) | 28(1) | 22(1) | -2(1)  | 8(1)  | 4(1)   |
| C4  | 27(1) | 32(1) | 26(1) | -3(1)  | 8(1)  | 2(1)   |
| C5  | 43(1) | 73(2) | 46(1) | -11(1) | 21(1) | -27(1) |
| C6  | 43(1) | 48(1) | 32(1) | -16(1) | 12(1) | -1(1)  |
| C7  | 26(1) | 33(1) | 24(1) | -1(1)  | 5(1)  | 7(1)   |
| C8  | 37(1) | 34(1) | 29(1) | 4(1)   | 13(1) | 8(1)   |
| C9  | 28(1) | 35(1) | 26(1) | -3(1)  | 9(1)  | 2(1)   |
| C10 | 25(1) | 31(1) | 26(1) | -3(1)  | 10(1) | 2(1)   |
| C11 | 27(1) | 33(1) | 31(1) | -4(1)  | 12(1) | 4(1)   |
| C12 | 24(1) | 32(1) | 38(1) | 2(1)   | 11(1) | 6(1)   |
| C13 | 29(1) | 33(1) | 47(1) | -2(1)  | 11(1) | 4(1)   |
| C14 | 34(1) | 29(1) | 65(2) | 7(1)   | 10(1) | 3(1)   |
| C15 | 32(1) | 53(1) | 59(2) | 22(1)  | 13(1) | 6(1)   |
| C16 | 44(1) | 63(2) | 43(1) | 14(1)  | 18(1) | 22(1)  |
| C17 | 46(1) | 44(1) | 41(1) | 5(1)   | 17(1) | 20(1)  |
| C18 | 29(1) | 39(1) | 25(1) | -2(1)  | 4(1)  | 12(1)  |
| C19 | 29(1) | 62(2) | 45(1) | -19(1) | 4(1)  | 9(1)   |
| C20 | 30(1) | 97(2) | 65(2) | -30(2) | 10(1) | 16(1)  |
| C21 | 47(1) | 78(2) | 51(2) | -25(1) | 6(1)  | 30(1)  |
| C22 | 50(1) | 45(1) | 39(1) | -9(1)  | 1(1)  | 21(1)  |
| C23 | 36(1) | 37(1) | 34(1) | 0(1)   | 4(1)  | 12(1)  |

Table 5. Hydrogen coordinates ( $\times 10^4$ ) and isotropic displacement parameters ( $\text{\AA}^2 \times 10^3$ ) for **3aa**.

|     | x    | y     | z    | U(eq) |
|-----|------|-------|------|-------|
| H5A | 7708 | 113   | 1853 | 81    |
| H5B | 7306 | 1025  | 2803 | 81    |
| H5C | 6550 | 1292  | 1513 | 81    |
| H6A | 2306 | -3048 | -284 | 62    |
| H6B | 2913 | -4183 | 596  | 62    |

|     |      |       |      |    |
|-----|------|-------|------|----|
| H6C | 4106 | -3424 | -46  | 62 |
| H7  | 5213 | -1790 | 4614 | 33 |
| H8A | 2586 | -3828 | 4178 | 39 |
| H8B | 3601 | -3232 | 5377 | 39 |
| H11 | 660  | 290   | 3916 | 35 |
| H13 | 791  | 2767  | 3474 | 43 |
| H14 | 697  | 4428  | 2104 | 52 |
| H15 | 1028 | 3860  | 322  | 57 |
| H16 | 1448 | 1628  | -106 | 57 |
| H17 | 1625 | -28   | 1278 | 50 |
| H19 | 7537 | -2163 | 3955 | 55 |
| H20 | 9010 | -3584 | 3130 | 76 |
| H21 | 7815 | -5655 | 2274 | 70 |
| H22 | 5169 | -6325 | 2251 | 55 |
| H23 | 3688 | -4920 | 3072 | 43 |

Table 6. Torsion angles [°] for **3aa**.

|               |             |
|---------------|-------------|
| O3-C2-C3-C4   | -162.13(16) |
| O3-C2-C3-C7   | 80.1(2)     |
| O3-C2-C3-C10  | -31.4(2)    |
| O4-C9-C10-C3  | -178.79(18) |
| O4-C9-C10-C11 | 2.5(3)      |
| N2-C2-C3-C4   | 22.6(2)     |
| N2-C2-C3-C7   | -95.20(18)  |
| N2-C2-C3-C10  | 153.38(16)  |
| C1-N1-C4-O1   | -173.2(2)   |
| C1-N1-C4-C3   | 12.2(3)     |
| C1-N2-C2-O3   | 174.58(19)  |
| C1-N2-C2-C3   | -10.1(3)    |
| C2-N2-C1-O2   | 179.1(2)    |
| C2-N2-C1-N1   | -2.6(3)     |

|                |             |
|----------------|-------------|
| C2-C3-C4-O1    | 161.92(17)  |
| C2-C3-C4-N1    | -23.6(2)    |
| C2-C3-C7-C8    | -86.66(16)  |
| C2-C3-C7-C18   | 42.1(2)     |
| C2-C3-C10-C9   | 95.05(18)   |
| C2-C3-C10-C11  | -86.4(2)    |
| C3-C7-C8-C9    | -31.98(18)  |
| C3-C7-C18-C19  | 91.3(2)     |
| C3-C7-C18-C23  | -85.5(2)    |
| C3-C10-C11-C12 | 5.7(3)      |
| C4-N1-C1-O2    | 179.7(2)    |
| C4-N1-C1-N2    | 1.4(3)      |
| C4-C3-C7-C8    | 150.28(15)  |
| C4-C3-C7-C18   | -80.94(19)  |
| C4-C3-C10-C9   | -133.41(16) |
| C4-C3-C10-C11  | 45.1(3)     |
| C5-N1-C1-O2    | 0.9(3)      |
| C5-N1-C1-N2    | -177.5(2)   |
| C5-N1-C4-O1    | 5.7(3)      |
| C5-N1-C4-C3    | -168.88(19) |
| C6-N2-C1-O2    | 2.0(3)      |
| C6-N2-C1-N1    | -179.68(19) |
| C6-N2-C2-O3    | -8.4(3)     |
| C6-N2-C2-C3    | 166.91(17)  |
| C7-C3-C4-O1    | -80.0(2)    |
| C7-C3-C4-N1    | 94.53(18)   |
| C7-C3-C10-C9   | -19.24(18)  |
| C7-C3-C10-C11  | 159.32(19)  |
| C7-C8-C9-O4    | -160.46(19) |
| C7-C8-C9-C10   | 20.9(2)     |
| C7-C18-C19-C20 | -175.3(2)   |
| C7-C18-C23-C22 | 175.16(19)  |
| C8-C7-C18-C19  | -147.4(2)   |



|                 |             |
|-----------------|-------------|
| C8-C7-C18-C23   | 35.8(3)     |
| C8-C9-C10-C3    | -0.1(2)     |
| C8-C9-C10-C11   | -178.87(17) |
| C9-C10-C11-C12  | -175.86(18) |
| C10-C3-C4-O1    | 31.7(2)     |
| C10-C3-C4-N1    | -153.78(16) |
| C10-C3-C7-C8    | 31.26(17)   |
| C10-C3-C7-C18   | 160.03(15)  |
| C10-C11-C12-C13 | -149.1(2)   |
| C10-C11-C12-C17 | 33.8(3)     |
| C11-C12-C13-C14 | -179.60(17) |
| C11-C12-C17-C16 | 178.44(19)  |
| C12-C13-C14-C15 | 1.7(3)      |
| C13-C12-C17-C16 | 1.4(3)      |
| C13-C14-C15-C16 | 0.2(3)      |
| C14-C15-C16-C17 | -1.3(3)     |
| C15-C16-C17-C12 | 0.5(3)      |
| C17-C12-C13-C14 | -2.5(3)     |
| C18-C7-C8-C9    | -158.62(16) |
| C18-C19-C20-C21 | -0.6(4)     |
| C19-C18-C23-C22 | -1.7(3)     |
| C19-C20-C21-C22 | -0.5(5)     |
| C20-C21-C22-C23 | 0.4(4)      |
| C21-C22-C23-C18 | 0.7(3)      |
| C23-C18-C19-C20 | 1.6(4)      |

---

Symmetry transformations used to generate equivalent atoms:

Table 7. Hydrogen bonds for **3aa** [Å and °].

---

| D-H...A | d(D-H) | d(H...A) | d(D...A) | <(DHA) |
|---------|--------|----------|----------|--------|
|---------|--------|----------|----------|--------|

---

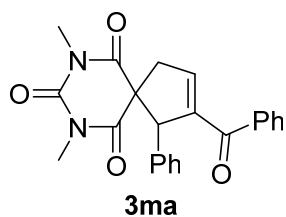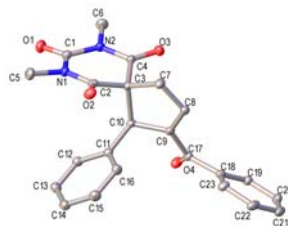

Table 1. Crystal data and structure refinement for **3ma**.

|                                 |                                                               |                 |
|---------------------------------|---------------------------------------------------------------|-----------------|
| Identification code             | <b>3ma</b>                                                    |                 |
| Empirical formula               | C <sub>23</sub> H <sub>20</sub> N <sub>2</sub> O <sub>4</sub> |                 |
| Formula weight                  | 388.41                                                        |                 |
| Temperature                     | 173 K                                                         |                 |
| Wavelength                      | 0.71073 Å                                                     |                 |
| Crystal system                  | Monoclinic                                                    |                 |
| Space group                     | P 1 21/c 1                                                    |                 |
| Unit cell dimensions            | a = 8.989(4) Å                                                | α = 90°.        |
|                                 | b = 5.730(3) Å                                                | β = 96.682(6)°. |
|                                 | c = 36.156(16) Å                                              | γ = 90°.        |
| Volume                          | 1849.6(15) Å <sup>3</sup>                                     |                 |
| Z                               | 4                                                             |                 |
| Density (calculated)            | 1.395 Mg/m <sup>3</sup>                                       |                 |
| Absorption coefficient          | 0.096 mm <sup>-1</sup>                                        |                 |
| F(000)                          | 816                                                           |                 |
| Crystal size                    | 0.24 x 0.07 x 0.07 mm <sup>3</sup>                            |                 |
| Theta range for data collection | 1.134 to 27.500°.                                             |                 |
| Index ranges                    | -11 ≤ h ≤ 11, -6 ≤ k ≤ 7, -46 ≤ l ≤ 46                        |                 |
| Reflections collected           | 15481                                                         |                 |
| Independent reflections         | 4233 [R(int) = 0.1260]                                        |                 |
| Completeness to theta = 26.000° | 99.8 %                                                        |                 |
| Absorption correction           | Semi-empirical from equivalents                               |                 |
| Max. and min. transmission      | 1.000 and 0.815                                               |                 |
| Refinement method               | Full-matrix least-squares on F <sup>2</sup>                   |                 |

|                                   |                                    |
|-----------------------------------|------------------------------------|
| Data / restraints / parameters    | 4233 / 0 / 264                     |
| Goodness-of-fit on F <sup>2</sup> | 1.181                              |
| Final R indices [I>2sigma(I)]     | R1 = 0.0714, wR2 = 0.1666          |
| R indices (all data)              | R1 = 0.0774, wR2 = 0.1711          |
| Extinction coefficient            | n/a                                |
| Largest diff. peak and hole       | 0.314 and -0.274 e.Å <sup>-3</sup> |

Table 2. Atomic coordinates ( $\times 10^4$ ) and equivalent isotropic displacement parameters ( $\text{\AA}^2 \times 10^3$ ) for **3ma**. U(eq) is defined as one third of the trace of the orthogonalized  $U^{ij}$  tensor.

|     | x       | y        | z       | U(eq) |
|-----|---------|----------|---------|-------|
| O1  | -358(2) | 4771(3)  | 6960(1) | 38(1) |
| O2  | 2317(2) | 11131(3) | 6687(1) | 35(1) |
| O3  | 686(2)  | 5679(3)  | 5774(1) | 36(1) |
| O4  | 5415(2) | 3402(3)  | 5897(1) | 33(1) |
| N1  | 1040(2) | 7919(3)  | 6835(1) | 28(1) |
| N2  | 103(2)  | 5265(3)  | 6362(1) | 28(1) |
| C1  | 247(2)  | 5885(4)  | 6736(1) | 27(1) |
| C2  | 1819(2) | 9215(4)  | 6598(1) | 26(1) |
| C3  | 2084(2) | 8045(4)  | 6236(1) | 24(1) |
| C4  | 894(2)  | 6283(4)  | 6097(1) | 25(1) |
| C5  | 949(3)  | 8837(5)  | 7212(1) | 38(1) |
| C6  | -944(3) | 3357(5)  | 6247(1) | 39(1) |
| C7  | 2307(3) | 9815(4)  | 5924(1) | 30(1) |
| C8  | 3554(2) | 8796(4)  | 5735(1) | 26(1) |
| C9  | 4222(2) | 7016(4)  | 5922(1) | 24(1) |
| C10 | 3616(2) | 6566(4)  | 6290(1) | 23(1) |
| C11 | 4718(2) | 7267(4)  | 6622(1) | 24(1) |
| C12 | 4825(3) | 5919(4)  | 6944(1) | 30(1) |

|     |         |         |         |       |
|-----|---------|---------|---------|-------|
| C13 | 5808(3) | 6537(5) | 7253(1) | 36(1) |
| C14 | 6713(3) | 8486(5) | 7242(1) | 36(1) |
| C15 | 6603(3) | 9851(4) | 6923(1) | 36(1) |
| C16 | 5619(3) | 9248(4) | 6614(1) | 31(1) |
| C17 | 5343(2) | 5437(4) | 5791(1) | 24(1) |
| C18 | 6363(2) | 6294(4) | 5523(1) | 25(1) |
| C19 | 6740(2) | 4799(4) | 5246(1) | 30(1) |
| C20 | 7754(3) | 5483(5) | 5008(1) | 37(1) |
| C21 | 8423(3) | 7646(5) | 5050(1) | 38(1) |
| C22 | 8062(3) | 9152(4) | 5323(1) | 37(1) |
| C23 | 7007(2) | 8505(4) | 5559(1) | 32(1) |

---

Table 3. Bond lengths [Å] and angles [°] for **3ma**.

|        |          |
|--------|----------|
| O1-C1  | 1.209(3) |
| O2-C2  | 1.214(3) |
| O3-C4  | 1.212(3) |
| O4-C17 | 1.227(3) |
| N1-C1  | 1.391(3) |
| N1-C2  | 1.385(3) |
| N1-C5  | 1.471(3) |
| N2-C1  | 1.391(3) |
| N2-C4  | 1.386(3) |
| N2-C6  | 1.470(3) |
| C2-C3  | 1.515(3) |
| C3-C4  | 1.513(3) |
| C3-C7  | 1.546(3) |
| C3-C10 | 1.609(3) |
| C5-H5A | 0.9600   |

|         |          |
|---------|----------|
| C5-H5B  | 0.9600   |
| C5-H5C  | 0.9600   |
| C6-H6A  | 0.9600   |
| C6-H6B  | 0.9600   |
| C6-H6C  | 0.9600   |
| C7-H7A  | 0.9700   |
| C7-H7B  | 0.9700   |
| C7-C8   | 1.498(3) |
| C8-H8   | 0.9300   |
| C8-C9   | 1.329(3) |
| C9-C10  | 1.516(3) |
| C9-C17  | 1.473(3) |
| C10-H10 | 0.9800   |
| C10-C11 | 1.517(3) |
| C11-C12 | 1.391(3) |
| C11-C16 | 1.397(3) |
| C12-H12 | 0.9300   |
| C12-C13 | 1.389(3) |
| C13-H13 | 0.9300   |
| C13-C14 | 1.385(4) |
| C14-H14 | 0.9300   |
| C14-C15 | 1.386(4) |
| C15-H15 | 0.9300   |
| C15-C16 | 1.386(3) |
| C16-H16 | 0.9300   |
| C17-C18 | 1.493(3) |
| C18-C19 | 1.389(3) |
| C18-C23 | 1.393(3) |
| C19-H19 | 0.9300   |
| C19-C20 | 1.382(3) |

|           |            |
|-----------|------------|
| C20-H20   | 0.9300     |
| C20-C21   | 1.378(4)   |
| C21-H21   | 0.9300     |
| C21-C22   | 1.378(4)   |
| C22-H22   | 0.9300     |
| C22-C23   | 1.396(3)   |
| C23-H23   | 0.9300     |
|           |            |
| C1-N1-C5  | 117.15(18) |
| C2-N1-C1  | 124.75(18) |
| C2-N1-C5  | 117.96(19) |
| C1-N2-C6  | 116.66(19) |
| C4-N2-C1  | 124.54(19) |
| C4-N2-C6  | 118.79(19) |
| O1-C1-N1  | 121.7(2)   |
| O1-C1-N2  | 121.3(2)   |
| N2-C1-N1  | 116.89(19) |
| O2-C2-N1  | 121.2(2)   |
| O2-C2-C3  | 122.5(2)   |
| N1-C2-C3  | 116.16(19) |
| C2-C3-C7  | 112.76(18) |
| C2-C3-C10 | 110.22(17) |
| C4-C3-C2  | 113.86(17) |
| C4-C3-C7  | 110.08(18) |
| C4-C3-C10 | 104.52(17) |
| C7-C3-C10 | 104.68(16) |
| O3-C4-N2  | 120.7(2)   |
| O3-C4-C3  | 122.23(19) |
| N2-C4-C3  | 116.92(18) |
| N1-C5-H5A | 109.5      |

|             |            |
|-------------|------------|
| N1-C5-H5B   | 109.5      |
| N1-C5-H5C   | 109.5      |
| H5A-C5-H5B  | 109.5      |
| H5A-C5-H5C  | 109.5      |
| H5B-C5-H5C  | 109.5      |
| N2-C6-H6A   | 109.5      |
| N2-C6-H6B   | 109.5      |
| N2-C6-H6C   | 109.5      |
| H6A-C6-H6B  | 109.5      |
| H6A-C6-H6C  | 109.5      |
| H6B-C6-H6C  | 109.5      |
| C3-C7-H7A   | 110.9      |
| C3-C7-H7B   | 110.9      |
| H7A-C7-H7B  | 109.0      |
| C8-C7-C3    | 104.12(17) |
| C8-C7-H7A   | 110.9      |
| C8-C7-H7B   | 110.9      |
| C7-C8-H8    | 123.7      |
| C9-C8-C7    | 112.61(19) |
| C9-C8-H8    | 123.7      |
| C8-C9-C10   | 112.98(18) |
| C8-C9-C17   | 126.34(19) |
| C17-C9-C10  | 120.48(18) |
| C3-C10-H10  | 109.3      |
| C9-C10-C3   | 101.10(16) |
| C9-C10-H10  | 109.3      |
| C9-C10-C11  | 112.32(17) |
| C11-C10-C3  | 115.31(17) |
| C11-C10-H10 | 109.3      |
| C12-C11-C10 | 119.31(19) |

|             |            |
|-------------|------------|
| C12-C11-C16 | 118.9(2)   |
| C16-C11-C10 | 121.79(19) |
| C11-C12-H12 | 119.7      |
| C13-C12-C11 | 120.5(2)   |
| C13-C12-H12 | 119.7      |
| C12-C13-H13 | 119.9      |
| C14-C13-C12 | 120.2(2)   |
| C14-C13-H13 | 119.9      |
| C13-C14-H14 | 120.2      |
| C13-C14-C15 | 119.6(2)   |
| C15-C14-H14 | 120.2      |
| C14-C15-H15 | 119.8      |
| C16-C15-C14 | 120.4(2)   |
| C16-C15-H15 | 119.8      |
| C11-C16-H16 | 119.8      |
| C15-C16-C11 | 120.3(2)   |
| C15-C16-H16 | 119.8      |
| O4-C17-C9   | 119.76(19) |
| O4-C17-C18  | 120.06(19) |
| C9-C17-C18  | 120.17(18) |
| C19-C18-C17 | 119.0(2)   |
| C19-C18-C23 | 119.6(2)   |
| C23-C18-C17 | 121.26(19) |
| C18-C19-H19 | 119.7      |
| C20-C19-C18 | 120.6(2)   |
| C20-C19-H19 | 119.7      |
| C19-C20-H20 | 120.1      |
| C21-C20-C19 | 119.8(2)   |
| C21-C20-H20 | 120.1      |
| C20-C21-H21 | 119.8      |



|             |          |
|-------------|----------|
| C20-C21-C22 | 120.4(2) |
| C22-C21-H21 | 119.8    |
| C21-C22-H22 | 119.9    |
| C21-C22-C23 | 120.3(2) |
| C23-C22-H22 | 119.9    |
| C18-C23-C22 | 119.3(2) |
| C18-C23-H23 | 120.4    |
| C22-C23-H23 | 120.4    |

---

Symmetry transformations used to generate equivalent atoms:

Table 4. Anisotropic displacement parameters ( $\text{\AA}^2 \times 10^3$ ) for **3ma**. The anisotropic displacement factor exponent takes the form:  $-2\pi^2 [h^2 a^{*2} U^{11} + \dots + 2 h k a^* b^* U^{12}]$

---

|    | $U^{11}$ | $U^{22}$ | $U^{33}$ | $U^{23}$ | $U^{13}$ | $U^{12}$ |
|----|----------|----------|----------|----------|----------|----------|
| O1 | 41(1)    | 41(1)    | 35(1)    | 6(1)     | 13(1)    | -6(1)    |
| O2 | 33(1)    | 29(1)    | 45(1)    | -7(1)    | 10(1)    | -2(1)    |
| O3 | 29(1)    | 53(1)    | 26(1)    | -4(1)    | 1(1)     | -5(1)    |
| O4 | 32(1)    | 27(1)    | 43(1)    | 5(1)     | 13(1)    | 3(1)     |
| N1 | 26(1)    | 33(1)    | 24(1)    | -3(1)    | 6(1)     | -1(1)    |
| N2 | 22(1)    | 34(1)    | 28(1)    | -1(1)    | 2(1)     | -5(1)    |
| C1 | 23(1)    | 32(1)    | 28(1)    | -1(1)    | 5(1)     | 1(1)     |
| C2 | 21(1)    | 27(1)    | 31(1)    | 0(1)     | 4(1)     | 3(1)     |
| C3 | 21(1)    | 26(1)    | 26(1)    | 1(1)     | 4(1)     | 2(1)     |
| C4 | 20(1)    | 33(1)    | 24(1)    | 2(1)     | 4(1)     | 1(1)     |
| C5 | 40(1)    | 46(1)    | 29(1)    | -8(1)    | 9(1)     | -2(1)    |
| C6 | 31(1)    | 44(1)    | 40(1)    | -4(1)    | 2(1)     | -12(1)   |
| C7 | 28(1)    | 29(1)    | 33(1)    | 6(1)     | 9(1)     | 6(1)     |
| C8 | 23(1)    | 28(1)    | 27(1)    | 3(1)     | 5(1)     | -2(1)    |

|     |       |       |       |       |       |       |
|-----|-------|-------|-------|-------|-------|-------|
| C9  | 19(1) | 25(1) | 27(1) | 0(1)  | 5(1)  | -3(1) |
| C10 | 18(1) | 22(1) | 28(1) | 1(1)  | 4(1)  | 2(1)  |
| C11 | 21(1) | 25(1) | 27(1) | 0(1)  | 5(1)  | 3(1)  |
| C12 | 26(1) | 31(1) | 33(1) | 4(1)  | 4(1)  | -1(1) |
| C13 | 32(1) | 43(1) | 31(1) | 6(1)  | 1(1)  | 1(1)  |
| C14 | 28(1) | 46(1) | 31(1) | -2(1) | 0(1)  | 0(1)  |
| C15 | 31(1) | 38(1) | 38(1) | -2(1) | 2(1)  | -8(1) |
| C16 | 31(1) | 32(1) | 30(1) | 4(1)  | 4(1)  | -3(1) |
| C17 | 21(1) | 25(1) | 26(1) | -2(1) | 2(1)  | 0(1)  |
| C18 | 20(1) | 28(1) | 28(1) | 2(1)  | 3(1)  | 4(1)  |
| C19 | 24(1) | 35(1) | 31(1) | -2(1) | 2(1)  | 2(1)  |
| C20 | 30(1) | 53(2) | 29(1) | -2(1) | 8(1)  | 7(1)  |
| C21 | 26(1) | 53(2) | 37(1) | 14(1) | 11(1) | 6(1)  |
| C22 | 24(1) | 37(1) | 51(1) | 13(1) | 11(1) | 0(1)  |
| C23 | 25(1) | 29(1) | 42(1) | 1(1)  | 9(1)  | 2(1)  |

Table 5. Hydrogen coordinates ( $\times 10^4$ ) and isotropic displacement parameters ( $\text{\AA}^2 \times 10^3$ ) for **3ma**.

|     | x     | y     | z    | U(eq) |
|-----|-------|-------|------|-------|
| H5A | 89    | 8187  | 7309 | 57    |
| H5B | 860   | 10506 | 7202 | 57    |
| H5C | 1838  | 8415  | 7371 | 57    |
| H6A | -563  | 1922  | 6358 | 58    |
| H6B | -1051 | 3211  | 5981 | 58    |
| H6C | -1902 | 3691  | 6328 | 58    |
| H7A | 1402  | 9966  | 5751 | 35    |
| H7B | 2581  | 11338 | 6028 | 35    |

|     |      |       |      |    |
|-----|------|-------|------|----|
| H8  | 3830 | 9348  | 5511 | 31 |
| H10 | 3378 | 4904  | 6309 | 27 |
| H12 | 4233 | 4593  | 6952 | 36 |
| H13 | 5859 | 5640  | 7469 | 43 |
| H14 | 7391 | 8876  | 7447 | 43 |
| H15 | 7194 | 11180 | 6917 | 43 |
| H16 | 5557 | 10168 | 6401 | 37 |
| H19 | 6306 | 3326  | 5221 | 36 |
| H20 | 7985 | 4486  | 4820 | 44 |
| H21 | 9122 | 8092  | 4893 | 46 |
| H22 | 8523 | 10604 | 5351 | 44 |
| H23 | 6737 | 9540  | 5737 | 38 |

---

Table 6. Torsion angles [°] for **3ma**.

|                |            |
|----------------|------------|
| O2-C2-C3-C4    | -154.8(2)  |
| O2-C2-C3-C7    | -28.4(3)   |
| O2-C2-C3-C10   | 88.2(2)    |
| O4-C17-C18-C19 | 35.9(3)    |
| O4-C17-C18-C23 | -140.4(2)  |
| N1-C2-C3-C4    | 28.6(3)    |
| N1-C2-C3-C7    | 155.00(19) |
| N1-C2-C3-C10   | -88.4(2)   |
| C1-N1-C2-O2    | 170.0(2)   |
| C1-N1-C2-C3    | -13.4(3)   |
| C1-N2-C4-O3    | -178.5(2)  |
| C1-N2-C4-C3    | 5.3(3)     |
| C2-N1-C1-O1    | 176.7(2)   |
| C2-N1-C1-N2    | -7.2(3)    |
| C2-C3-C4-O3    | 158.9(2)   |
| C2-C3-C4-N2    | -25.0(3)   |

|                |             |
|----------------|-------------|
| C2-C3-C7-C8    | 138.95(18)  |
| C2-C3-C10-C9   | -141.98(18) |
| C2-C3-C10-C11  | -20.6(2)    |
| C3-C7-C8-C9    | -10.7(3)    |
| C3-C10-C11-C12 | 101.8(2)    |
| C3-C10-C11-C16 | -77.5(2)    |
| C4-N2-C1-O1    | -172.3(2)   |
| C4-N2-C1-N1    | 11.6(3)     |
| C4-C3-C7-C8    | -92.7(2)    |
| C4-C3-C10-C9   | 95.29(18)   |
| C4-C3-C10-C11  | -143.32(18) |
| C5-N1-C1-O1    | -7.8(3)     |
| C5-N1-C1-N2    | 168.3(2)    |
| C5-N1-C2-O2    | -5.5(3)     |
| C5-N1-C2-C3    | 171.2(2)    |
| C6-N2-C1-O1    | 6.3(3)      |
| C6-N2-C1-N1    | -169.8(2)   |
| C6-N2-C4-O3    | 2.9(3)      |
| C6-N2-C4-C3    | -173.25(19) |
| C7-C3-C4-O3    | 31.2(3)     |
| C7-C3-C4-N2    | -152.70(18) |
| C7-C3-C10-C9   | -20.5(2)    |
| C7-C3-C10-C11  | 100.9(2)    |
| C7-C8-C9-C10   | -3.5(3)     |
| C7-C8-C9-C17   | 171.3(2)    |
| C8-C9-C10-C3   | 15.3(2)     |
| C8-C9-C10-C11  | -108.2(2)   |
| C8-C9-C17-O4   | -148.9(2)   |
| C8-C9-C17-C18  | 29.5(3)     |
| C9-C10-C11-C12 | -143.13(19) |
| C9-C10-C11-C16 | 37.6(3)     |
| C9-C17-C18-C19 | -142.6(2)   |

|                 |             |
|-----------------|-------------|
| C9-C17-C18-C23  | 41.2(3)     |
| C10-C3-C4-O3    | -80.7(2)    |
| C10-C3-C4-N2    | 95.4(2)     |
| C10-C3-C7-C8    | 19.1(2)     |
| C10-C9-C17-O4   | 25.5(3)     |
| C10-C9-C17-C18  | -156.04(19) |
| C10-C11-C12-C13 | -179.1(2)   |
| C10-C11-C16-C15 | 179.4(2)    |
| C11-C12-C13-C14 | -1.1(4)     |
| C12-C11-C16-C15 | 0.1(3)      |
| C12-C13-C14-C15 | 1.7(4)      |
| C13-C14-C15-C16 | -1.4(4)     |
| C14-C15-C16-C11 | 0.5(4)      |
| C16-C11-C12-C13 | 0.2(3)      |
| C17-C9-C10-C3   | -159.85(18) |
| C17-C9-C10-C11  | 76.7(2)     |
| C17-C18-C19-C20 | -175.9(2)   |
| C17-C18-C23-C22 | 174.0(2)    |
| C18-C19-C20-C21 | 1.4(4)      |
| C19-C18-C23-C22 | -2.2(3)     |
| C19-C20-C21-C22 | -1.4(4)     |
| C20-C21-C22-C23 | -0.4(4)     |
| C21-C22-C23-C18 | 2.2(4)      |
| C23-C18-C19-C20 | 0.4(3)      |

---

Symmetry transformations used to generate equivalent atoms:

Table 7. Hydrogen bonds for **3ma** [Å and °].

---

| D-H...A | d(D-H) | d(H...A) | d(D...A) | <(DHA) |
|---------|--------|----------|----------|--------|
|---------|--------|----------|----------|--------|

---

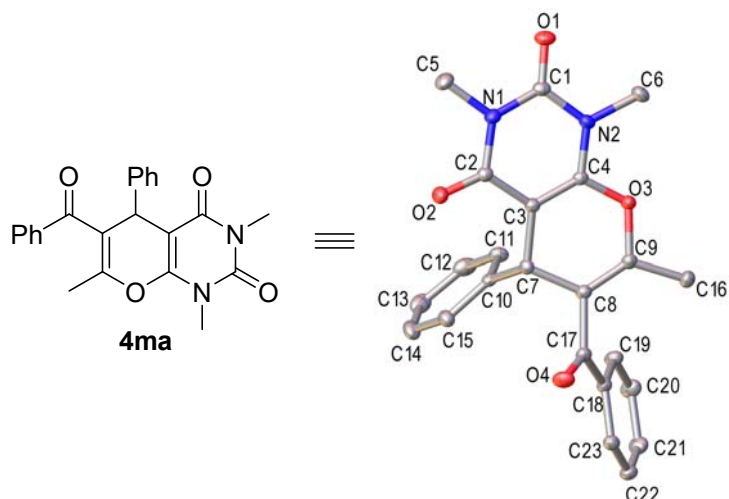

Table 1. Crystal data and structure refinement for **4ma**.

|                                 |                                                               |                 |
|---------------------------------|---------------------------------------------------------------|-----------------|
| Identification code             | <b>4ma</b>                                                    |                 |
| Empirical formula               | C <sub>23</sub> H <sub>20</sub> N <sub>2</sub> O <sub>4</sub> |                 |
| Formula weight                  | 388.41                                                        |                 |
| Temperature                     | 173 K                                                         |                 |
| Wavelength                      | 0.71073 Å                                                     |                 |
| Crystal system                  | Monoclinic                                                    |                 |
| Space group                     | P 1 21/c 1                                                    |                 |
| Unit cell dimensions            | a = 8.989(4) Å                                                | α = 90°.        |
|                                 | b = 5.730(3) Å                                                | β = 96.682(6)°. |
|                                 | c = 36.156(16) Å                                              | γ = 90°.        |
| Volume                          | 1849.6(15) Å <sup>3</sup>                                     |                 |
| Z                               | 4                                                             |                 |
| Density (calculated)            | 1.395 Mg/m <sup>3</sup>                                       |                 |
| Absorption coefficient          | 0.096 mm <sup>-1</sup>                                        |                 |
| F(000)                          | 816                                                           |                 |
| Crystal size                    | 0.24 x 0.07 x 0.07 mm <sup>3</sup>                            |                 |
| Theta range for data collection | 1.134 to 27.500°.                                             |                 |
| Index ranges                    | -11 ≤ h ≤ 11, -6 ≤ k ≤ 7, -46 ≤ l ≤ 46                        |                 |
| Reflections collected           | 15481                                                         |                 |
| Independent reflections         | 4233 [R(int) = 0.1260]                                        |                 |
| Completeness to theta = 26.000° | 99.8 %                                                        |                 |
| Absorption correction           | Semi-empirical from equivalents                               |                 |
| Max. and min. transmission      | 1.000 and 0.815                                               |                 |

|                                   |                                             |
|-----------------------------------|---------------------------------------------|
| Refinement method                 | Full-matrix least-squares on F <sup>2</sup> |
| Data / restraints / parameters    | 4233 / 0 / 264                              |
| Goodness-of-fit on F <sup>2</sup> | 1.181                                       |
| Final R indices [I>2sigma(I)]     | R1 = 0.0714, wR2 = 0.1666                   |
| R indices (all data)              | R1 = 0.0774, wR2 = 0.1711                   |
| Extinction coefficient            | n/a                                         |
| Largest diff. peak and hole       | 0.314 and -0.274 e.Å <sup>-3</sup>          |

Table 2. Atomic coordinates ( $\times 10^4$ ) and equivalent isotropic displacement parameters ( $\text{\AA}^2 \times 10^3$ ) for **4ma**.  $U(\text{eq})$  is defined as one third of the trace of the orthogonalized  $U^{ij}$  tensor.

|     | x       | y        | z       | U(eq) |
|-----|---------|----------|---------|-------|
| O1  | -358(2) | 4771(3)  | 6960(1) | 38(1) |
| O2  | 2317(2) | 11131(3) | 6687(1) | 35(1) |
| O3  | 686(2)  | 5679(3)  | 5774(1) | 36(1) |
| O4  | 5415(2) | 3402(3)  | 5897(1) | 33(1) |
| N1  | 1040(2) | 7919(3)  | 6835(1) | 28(1) |
| N2  | 103(2)  | 5265(3)  | 6362(1) | 28(1) |
| C1  | 247(2)  | 5885(4)  | 6736(1) | 27(1) |
| C2  | 1819(2) | 9215(4)  | 6598(1) | 26(1) |
| C3  | 2084(2) | 8045(4)  | 6236(1) | 24(1) |
| C4  | 894(2)  | 6283(4)  | 6097(1) | 25(1) |
| C5  | 949(3)  | 8837(5)  | 7212(1) | 38(1) |
| C6  | -944(3) | 3357(5)  | 6247(1) | 39(1) |
| C7  | 2307(3) | 9815(4)  | 5924(1) | 30(1) |
| C8  | 3554(2) | 8796(4)  | 5735(1) | 26(1) |
| C9  | 4222(2) | 7016(4)  | 5922(1) | 24(1) |
| C10 | 3616(2) | 6566(4)  | 6290(1) | 23(1) |
| C11 | 4718(2) | 7267(4)  | 6622(1) | 24(1) |
| C12 | 4825(3) | 5919(4)  | 6944(1) | 30(1) |

|     |         |         |         |       |
|-----|---------|---------|---------|-------|
| C13 | 5808(3) | 6537(5) | 7253(1) | 36(1) |
| C14 | 6713(3) | 8486(5) | 7242(1) | 36(1) |
| C15 | 6603(3) | 9851(4) | 6923(1) | 36(1) |
| C16 | 5619(3) | 9248(4) | 6614(1) | 31(1) |
| C17 | 5343(2) | 5437(4) | 5791(1) | 24(1) |
| C18 | 6363(2) | 6294(4) | 5523(1) | 25(1) |
| C19 | 6740(2) | 4799(4) | 5246(1) | 30(1) |
| C20 | 7754(3) | 5483(5) | 5008(1) | 37(1) |
| C21 | 8423(3) | 7646(5) | 5050(1) | 38(1) |
| C22 | 8062(3) | 9152(4) | 5323(1) | 37(1) |
| C23 | 7007(2) | 8505(4) | 5559(1) | 32(1) |

---

Table 3. Bond lengths [Å] and angles [°] for **4ma**.

|        |          |
|--------|----------|
| O1-C1  | 1.209(3) |
| O2-C2  | 1.214(3) |
| O3-C4  | 1.212(3) |
| O4-C17 | 1.227(3) |
| N1-C1  | 1.391(3) |
| N1-C2  | 1.385(3) |
| N1-C5  | 1.471(3) |
| N2-C1  | 1.391(3) |
| N2-C4  | 1.386(3) |
| N2-C6  | 1.470(3) |
| C2-C3  | 1.515(3) |
| C3-C4  | 1.513(3) |
| C3-C7  | 1.546(3) |
| C3-C10 | 1.609(3) |
| C5-H5A | 0.9600   |



|         |          |
|---------|----------|
| C5-H5B  | 0.9600   |
| C5-H5C  | 0.9600   |
| C6-H6A  | 0.9600   |
| C6-H6B  | 0.9600   |
| C6-H6C  | 0.9600   |
| C7-H7A  | 0.9700   |
| C7-H7B  | 0.9700   |
| C7-C8   | 1.498(3) |
| C8-H8   | 0.9300   |
| C8-C9   | 1.329(3) |
| C9-C10  | 1.516(3) |
| C9-C17  | 1.473(3) |
| C10-H10 | 0.9800   |
| C10-C11 | 1.517(3) |
| C11-C12 | 1.391(3) |
| C11-C16 | 1.397(3) |
| C12-H12 | 0.9300   |
| C12-C13 | 1.389(3) |
| C13-H13 | 0.9300   |
| C13-C14 | 1.385(4) |
| C14-H14 | 0.9300   |
| C14-C15 | 1.386(4) |
| C15-H15 | 0.9300   |
| C15-C16 | 1.386(3) |
| C16-H16 | 0.9300   |
| C17-C18 | 1.493(3) |
| C18-C19 | 1.389(3) |
| C18-C23 | 1.393(3) |
| C19-H19 | 0.9300   |
| C19-C20 | 1.382(3) |

|           |            |
|-----------|------------|
| C20-H20   | 0.9300     |
| C20-C21   | 1.378(4)   |
| C21-H21   | 0.9300     |
| C21-C22   | 1.378(4)   |
| C22-H22   | 0.9300     |
| C22-C23   | 1.396(3)   |
| C23-H23   | 0.9300     |
| C1-N1-C5  | 117.15(18) |
| C2-N1-C1  | 124.75(18) |
| C2-N1-C5  | 117.96(19) |
| C1-N2-C6  | 116.66(19) |
| C4-N2-C1  | 124.54(19) |
| C4-N2-C6  | 118.79(19) |
| O1-C1-N1  | 121.7(2)   |
| O1-C1-N2  | 121.3(2)   |
| N2-C1-N1  | 116.89(19) |
| O2-C2-N1  | 121.2(2)   |
| O2-C2-C3  | 122.5(2)   |
| N1-C2-C3  | 116.16(19) |
| C2-C3-C7  | 112.76(18) |
| C2-C3-C10 | 110.22(17) |
| C4-C3-C2  | 113.86(17) |
| C4-C3-C7  | 110.08(18) |
| C4-C3-C10 | 104.52(17) |
| C7-C3-C10 | 104.68(16) |
| O3-C4-N2  | 120.7(2)   |
| O3-C4-C3  | 122.23(19) |
| N2-C4-C3  | 116.92(18) |
| N1-C5-H5A | 109.5      |

|             |            |
|-------------|------------|
| N1-C5-H5B   | 109.5      |
| N1-C5-H5C   | 109.5      |
| H5A-C5-H5B  | 109.5      |
| H5A-C5-H5C  | 109.5      |
| H5B-C5-H5C  | 109.5      |
| N2-C6-H6A   | 109.5      |
| N2-C6-H6B   | 109.5      |
| N2-C6-H6C   | 109.5      |
| H6A-C6-H6B  | 109.5      |
| H6A-C6-H6C  | 109.5      |
| H6B-C6-H6C  | 109.5      |
| C3-C7-H7A   | 110.9      |
| C3-C7-H7B   | 110.9      |
| H7A-C7-H7B  | 109.0      |
| C8-C7-C3    | 104.12(17) |
| C8-C7-H7A   | 110.9      |
| C8-C7-H7B   | 110.9      |
| C7-C8-H8    | 123.7      |
| C9-C8-C7    | 112.61(19) |
| C9-C8-H8    | 123.7      |
| C8-C9-C10   | 112.98(18) |
| C8-C9-C17   | 126.34(19) |
| C17-C9-C10  | 120.48(18) |
| C3-C10-H10  | 109.3      |
| C9-C10-C3   | 101.10(16) |
| C9-C10-H10  | 109.3      |
| C9-C10-C11  | 112.32(17) |
| C11-C10-C3  | 115.31(17) |
| C11-C10-H10 | 109.3      |
| C12-C11-C10 | 119.31(19) |

|             |            |
|-------------|------------|
| C12-C11-C16 | 118.9(2)   |
| C16-C11-C10 | 121.79(19) |
| C11-C12-H12 | 119.7      |
| C13-C12-C11 | 120.5(2)   |
| C13-C12-H12 | 119.7      |
| C12-C13-H13 | 119.9      |
| C14-C13-C12 | 120.2(2)   |
| C14-C13-H13 | 119.9      |
| C13-C14-H14 | 120.2      |
| C13-C14-C15 | 119.6(2)   |
| C15-C14-H14 | 120.2      |
| C14-C15-H15 | 119.8      |
| C16-C15-C14 | 120.4(2)   |
| C16-C15-H15 | 119.8      |
| C11-C16-H16 | 119.8      |
| C15-C16-C11 | 120.3(2)   |
| C15-C16-H16 | 119.8      |
| O4-C17-C9   | 119.76(19) |
| O4-C17-C18  | 120.06(19) |
| C9-C17-C18  | 120.17(18) |
| C19-C18-C17 | 119.0(2)   |
| C19-C18-C23 | 119.6(2)   |
| C23-C18-C17 | 121.26(19) |
| C18-C19-H19 | 119.7      |
| C20-C19-C18 | 120.6(2)   |
| C20-C19-H19 | 119.7      |
| C19-C20-H20 | 120.1      |
| C21-C20-C19 | 119.8(2)   |
| C21-C20-H20 | 120.1      |
| C20-C21-H21 | 119.8      |

|             |          |
|-------------|----------|
| C20-C21-C22 | 120.4(2) |
| C22-C21-H21 | 119.8    |
| C21-C22-H22 | 119.9    |
| C21-C22-C23 | 120.3(2) |
| C23-C22-H22 | 119.9    |
| C18-C23-C22 | 119.3(2) |
| C18-C23-H23 | 120.4    |
| C22-C23-H23 | 120.4    |

---

Symmetry transformations used to generate equivalent atoms:

Table 4. Anisotropic displacement parameters ( $\text{\AA}^2 \times 10^3$ ) for **4ma**. The anisotropic displacement factor exponent takes the form:  $-2\pi^2 [h^2 a^{*2} U^{11} + \dots + 2 h k a^* b^* U^{12}]$

---

|    | $U^{11}$ | $U^{22}$ | $U^{33}$ | $U^{23}$ | $U^{13}$ | $U^{12}$ |
|----|----------|----------|----------|----------|----------|----------|
| O1 | 41(1)    | 41(1)    | 35(1)    | 6(1)     | 13(1)    | -6(1)    |
| O2 | 33(1)    | 29(1)    | 45(1)    | -7(1)    | 10(1)    | -2(1)    |
| O3 | 29(1)    | 53(1)    | 26(1)    | -4(1)    | 1(1)     | -5(1)    |
| O4 | 32(1)    | 27(1)    | 43(1)    | 5(1)     | 13(1)    | 3(1)     |
| N1 | 26(1)    | 33(1)    | 24(1)    | -3(1)    | 6(1)     | -1(1)    |
| N2 | 22(1)    | 34(1)    | 28(1)    | -1(1)    | 2(1)     | -5(1)    |
| C1 | 23(1)    | 32(1)    | 28(1)    | -1(1)    | 5(1)     | 1(1)     |
| C2 | 21(1)    | 27(1)    | 31(1)    | 0(1)     | 4(1)     | 3(1)     |
| C3 | 21(1)    | 26(1)    | 26(1)    | 1(1)     | 4(1)     | 2(1)     |
| C4 | 20(1)    | 33(1)    | 24(1)    | 2(1)     | 4(1)     | 1(1)     |
| C5 | 40(1)    | 46(1)    | 29(1)    | -8(1)    | 9(1)     | -2(1)    |
| C6 | 31(1)    | 44(1)    | 40(1)    | -4(1)    | 2(1)     | -12(1)   |
| C7 | 28(1)    | 29(1)    | 33(1)    | 6(1)     | 9(1)     | 6(1)     |
| C8 | 23(1)    | 28(1)    | 27(1)    | 3(1)     | 5(1)     | -2(1)    |

|     |       |       |       |       |       |       |
|-----|-------|-------|-------|-------|-------|-------|
| C9  | 19(1) | 25(1) | 27(1) | 0(1)  | 5(1)  | -3(1) |
| C10 | 18(1) | 22(1) | 28(1) | 1(1)  | 4(1)  | 2(1)  |
| C11 | 21(1) | 25(1) | 27(1) | 0(1)  | 5(1)  | 3(1)  |
| C12 | 26(1) | 31(1) | 33(1) | 4(1)  | 4(1)  | -1(1) |
| C13 | 32(1) | 43(1) | 31(1) | 6(1)  | 1(1)  | 1(1)  |
| C14 | 28(1) | 46(1) | 31(1) | -2(1) | 0(1)  | 0(1)  |
| C15 | 31(1) | 38(1) | 38(1) | -2(1) | 2(1)  | -8(1) |
| C16 | 31(1) | 32(1) | 30(1) | 4(1)  | 4(1)  | -3(1) |
| C17 | 21(1) | 25(1) | 26(1) | -2(1) | 2(1)  | 0(1)  |
| C18 | 20(1) | 28(1) | 28(1) | 2(1)  | 3(1)  | 4(1)  |
| C19 | 24(1) | 35(1) | 31(1) | -2(1) | 2(1)  | 2(1)  |
| C20 | 30(1) | 53(2) | 29(1) | -2(1) | 8(1)  | 7(1)  |
| C21 | 26(1) | 53(2) | 37(1) | 14(1) | 11(1) | 6(1)  |
| C22 | 24(1) | 37(1) | 51(1) | 13(1) | 11(1) | 0(1)  |
| C23 | 25(1) | 29(1) | 42(1) | 1(1)  | 9(1)  | 2(1)  |

Table 5. Hydrogen coordinates ( $\times 10^4$ ) and isotropic displacement parameters ( $\text{\AA}^2 \times 10^3$ ) for **4ma**.

|     | x     | y     | z    | U(eq) |
|-----|-------|-------|------|-------|
| H5A | 89    | 8187  | 7309 | 57    |
| H5B | 860   | 10506 | 7202 | 57    |
| H5C | 1838  | 8415  | 7371 | 57    |
| H6A | -563  | 1922  | 6358 | 58    |
| H6B | -1051 | 3211  | 5981 | 58    |
| H6C | -1902 | 3691  | 6328 | 58    |
| H7A | 1402  | 9966  | 5751 | 35    |
| H7B | 2581  | 11338 | 6028 | 35    |

|     |      |       |      |    |
|-----|------|-------|------|----|
| H8  | 3830 | 9348  | 5511 | 31 |
| H10 | 3378 | 4904  | 6309 | 27 |
| H12 | 4233 | 4593  | 6952 | 36 |
| H13 | 5859 | 5640  | 7469 | 43 |
| H14 | 7391 | 8876  | 7447 | 43 |
| H15 | 7194 | 11180 | 6917 | 43 |
| H16 | 5557 | 10168 | 6401 | 37 |
| H19 | 6306 | 3326  | 5221 | 36 |
| H20 | 7985 | 4486  | 4820 | 44 |
| H21 | 9122 | 8092  | 4893 | 46 |
| H22 | 8523 | 10604 | 5351 | 44 |
| H23 | 6737 | 9540  | 5737 | 38 |

---

Table 6. Torsion angles [°] for **4ma**.

|                |            |
|----------------|------------|
| O2-C2-C3-C4    | -154.8(2)  |
| O2-C2-C3-C7    | -28.4(3)   |
| O2-C2-C3-C10   | 88.2(2)    |
| O4-C17-C18-C19 | 35.9(3)    |
| O4-C17-C18-C23 | -140.4(2)  |
| N1-C2-C3-C4    | 28.6(3)    |
| N1-C2-C3-C7    | 155.00(19) |
| N1-C2-C3-C10   | -88.4(2)   |
| C1-N1-C2-O2    | 170.0(2)   |
| C1-N1-C2-C3    | -13.4(3)   |
| C1-N2-C4-O3    | -178.5(2)  |
| C1-N2-C4-C3    | 5.3(3)     |
| C2-N1-C1-O1    | 176.7(2)   |
| C2-N1-C1-N2    | -7.2(3)    |

|                |             |
|----------------|-------------|
| C2-C3-C4-O3    | 158.9(2)    |
| C2-C3-C4-N2    | -25.0(3)    |
| C2-C3-C7-C8    | 138.95(18)  |
| C2-C3-C10-C9   | -141.98(18) |
| C2-C3-C10-C11  | -20.6(2)    |
| C3-C7-C8-C9    | -10.7(3)    |
| C3-C10-C11-C12 | 101.8(2)    |
| C3-C10-C11-C16 | -77.5(2)    |
| C4-N2-C1-O1    | -172.3(2)   |
| C4-N2-C1-N1    | 11.6(3)     |
| C4-C3-C7-C8    | -92.7(2)    |
| C4-C3-C10-C9   | 95.29(18)   |
| C4-C3-C10-C11  | -143.32(18) |
| C5-N1-C1-O1    | -7.8(3)     |
| C5-N1-C1-N2    | 168.3(2)    |
| C5-N1-C2-O2    | -5.5(3)     |
| C5-N1-C2-C3    | 171.2(2)    |
| C6-N2-C1-O1    | 6.3(3)      |
| C6-N2-C1-N1    | -169.8(2)   |
| C6-N2-C4-O3    | 2.9(3)      |
| C6-N2-C4-C3    | -173.25(19) |
| C7-C3-C4-O3    | 31.2(3)     |
| C7-C3-C4-N2    | -152.70(18) |
| C7-C3-C10-C9   | -20.5(2)    |
| C7-C3-C10-C11  | 100.9(2)    |
| C7-C8-C9-C10   | -3.5(3)     |
| C7-C8-C9-C17   | 171.3(2)    |
| C8-C9-C10-C3   | 15.3(2)     |
| C8-C9-C10-C11  | -108.2(2)   |
| C8-C9-C17-O4   | -148.9(2)   |
| C8-C9-C17-C18  | 29.5(3)     |
| C9-C10-C11-C12 | -143.13(19) |



|                 |             |
|-----------------|-------------|
| C9-C10-C11-C16  | 37.6(3)     |
| C9-C17-C18-C19  | -142.6(2)   |
| C9-C17-C18-C23  | 41.2(3)     |
| C10-C3-C4-O3    | -80.7(2)    |
| C10-C3-C4-N2    | 95.4(2)     |
| C10-C3-C7-C8    | 19.1(2)     |
| C10-C9-C17-O4   | 25.5(3)     |
| C10-C9-C17-C18  | -156.04(19) |
| C10-C11-C12-C13 | -179.1(2)   |
| C10-C11-C16-C15 | 179.4(2)    |
| C11-C12-C13-C14 | -1.1(4)     |
| C12-C11-C16-C15 | 0.1(3)      |
| C12-C13-C14-C15 | 1.7(4)      |
| C13-C14-C15-C16 | -1.4(4)     |
| C14-C15-C16-C11 | 0.5(4)      |
| C16-C11-C12-C13 | 0.2(3)      |
| C17-C9-C10-C3   | -159.85(18) |
| C17-C9-C10-C11  | 76.7(2)     |
| C17-C18-C19-C20 | -175.9(2)   |
| C17-C18-C23-C22 | 174.0(2)    |
| C18-C19-C20-C21 | 1.4(4)      |
| C19-C18-C23-C22 | -2.2(3)     |
| C19-C20-C21-C22 | -1.4(4)     |
| C20-C21-C22-C23 | -0.4(4)     |
| C21-C22-C23-C18 | 2.2(4)      |
| C23-C18-C19-C20 | 0.4(3)      |

---

Symmetry transformations used to generate equivalent atoms:

Table 7. Hydrogen bonds for **4ma** [Å and °].

---

| D-H...A | d(D-H) | d(H...A) | d(D...A) | <(DHA) |
|---------|--------|----------|----------|--------|
|---------|--------|----------|----------|--------|

---
